# Supplementary material
Source: PubMed Central journal article supplement (PMC4189969)
Supplement: NIHMS589087-supplement-11136_2014_691_MOESM1_ESM.pdf [file NIHMS589087-supplement-11136_2014_691_MOESM1_ESM.pdf]

| Primary ICF Category | Secondary ICF Categories |  |  |  |  | PROMIS ItemID | PROMIS Bank                     | ItemStem                                                                       | Response                                                                                                                           | Context            |
|----------------------|--------------------------|--|--|--|--|---------------|---------------------------------|--------------------------------------------------------------------------------|------------------------------------------------------------------------------------------------------------------------------------|--------------------|
| b130                 | b160                     |  |  |  |  | FATIMP6       | PROMIS Bank v1.0 - Fatigue      | How often did your fatigue make you feel slowed down in your thinking?         | Never<br>Rarely<br>Sometimes<br>Often<br>Always                                                                                    | In the past 7 days |
| b130                 | b164                     |  |  |  |  | FATIMP9       | PROMIS Bank v1.0 - Fatigue      | How often did your fatigue make it difficult to plan activities ahead of time? | Never<br>Rarely<br>Sometimes<br>Often<br>Always                                                                                    | In the past 7 days |
| b1                   |                          |  |  |  |  | PC35          | PROMIS Applied Cog Gen Concerns | It has seemed like my brain was not working as well as usual                   | 1=Never<br>2=Rarely (Once)<br>3=Sometimes (Two or three times)<br>4=Often (About once a day)<br>5=Very often (Several times a day) | In the past 7 days |
| b126                 |                          |  |  |  |  | Iso-CaPS1     | PROMIS Isolation                | I feel isolated even when I am not alone                                       | 1=Never<br>2=Rarely<br>3=Sometimes<br>4=Usually<br>5=Always                                                                        |                    |
| b126                 |                          |  |  |  |  | UCLA11x2      | PROMIS Isolation                | I feel left out                                                                | 1=Never<br>2=Rarely<br>3=Sometimes<br>4=Usually<br>5=Always                                                                        |                    |
| b126                 |                          |  |  |  |  | UCLA14x2      | PROMIS Isolation                | I feel isolated from others                                                    | 1=Never<br>2=Rarely<br>3=Sometimes<br>4=Usually<br>5=Always                                                                        |                    |
| b126                 |                          |  |  |  |  | UCLA18x2      | PROMIS Isolation                | I feel that people are around me but not with me                               | 1=Never<br>2=Rarely<br>3=Sometimes<br>4=Usually<br>5=Always                                                                        |                    |
| b126                 |                          |  |  |  |  | UCLA8x3       | PROMIS Isolation                | I feel that I am alone in my interests and ideas                               | 1=Never<br>2=Rarely<br>3=Sometimes<br>4=Usually<br>5=Always                                                                        |                    |

|             |      |      |  |  |  |      |                             |                                                                                                                     |                                                                              |                                                                                                                                                                               |
|-------------|------|------|--|--|--|------|-----------------------------|---------------------------------------------------------------------------------------------------------------------|------------------------------------------------------------------------------|-------------------------------------------------------------------------------------------------------------------------------------------------------------------------------|
| <b>b126</b> | d710 | d910 |  |  |  | II20 | PROMIS Illness Impact (Neg) | I am willing to help others How true was this before your illness? How true is this now, since your illness?        | 1=Not at all<br>2=A little bit<br>3=Somewhat<br>4=Quite a bit<br>5=Very much | <u>Thinking about how your illness has affected you</u>, please rate how true this statement was of you <u>before your illness</u>, and again now, <u>since your illness</u>. |
| <b>b126</b> | d710 |      |  |  |  | II13 | PROMIS Illness Impact (Neg) | I have compassion for others How true was this before your illness? How true is this now, since your illness?       | 1=Not at all<br>2=A little bit<br>3=Somewhat<br>4=Quite a bit<br>5=Very much | <u>Thinking about how your illness has affected you</u>, please rate how true this statement was of you <u>before your illness</u>, and again now, <u>since your illness</u>. |
| <b>b126</b> | d710 |      |  |  |  | II19 | PROMIS Illness Impact (Neg) | I can appreciate people in my life How true was this before your illness? How true is this now, since your illness? | 1=Not at all<br>2=A little bit<br>3=Somewhat<br>4=Quite a bit<br>5=Very much | <u>Thinking about how your illness has affected you</u>, please rate how true this statement was of you <u>before your illness</u>, and again now, <u>since your illness</u>. |
| <b>b126</b> |      |      |  |  |  | II2  | PROMIS Illness Impact (Neg) | I am comfortable with who I am How true was this before your illness? How true is this now, since your illness?     | 1=Not at all<br>2=A little bit<br>3=Somewhat<br>4=Quite a bit<br>5=Very much | <u>Thinking about how your illness has affected you</u>, please rate how true this statement was of you <u>before your illness</u>, and again now, <u>since your illness</u>. |
| <b>b126</b> |      |      |  |  |  | II4  | PROMIS Illness Impact (Neg) | I believe I am a confident person How true was this before your illness? How true is this now, since your illness?  | 1=Not at all<br>2=A little bit<br>3=Somewhat<br>4=Quite a bit<br>5=Very much | <u>Thinking about how your illness has affected you</u>, please rate how true this statement was of you <u>before your illness</u>, and again now, <u>since your illness</u>. |
| <b>b126</b> |      |      |  |  |  | II5  | PROMIS Illness Impact (Neg) | I believe I am a good person How true was this before your illness? How true is this now, since your illness?       | 1=Not at all<br>2=A little bit<br>3=Somewhat<br>4=Quite a bit<br>5=Very much | <u>Thinking about how your illness has affected you</u>, please rate how true this statement was of you <u>before your illness</u>, and again now, <u>since your illness</u>. |

|             |  |  |  |  |  |      |                             |                                                                                                                              |                                                                              |                                                                                                                                                                               |
|-------------|--|--|--|--|--|------|-----------------------------|------------------------------------------------------------------------------------------------------------------------------|------------------------------------------------------------------------------|-------------------------------------------------------------------------------------------------------------------------------------------------------------------------------|
| <b>b126</b> |  |  |  |  |  | II6  | PROMIS Illness Impact (Neg) | I appreciate the health of my body<br>How true was this before your illness?<br>How true is this now, since your illness?    | 1=Not at all<br>2=A little bit<br>3=Somewhat<br>4=Quite a bit<br>5=Very much | <u>Thinking about how your illness has affected you</u>, please rate how true this statement was of you <u>before your illness</u>, and again now, <u>since your illness</u>. |
| <b>b126</b> |  |  |  |  |  | II7  | PROMIS Illness Impact (Neg) | I am an optimistic person How true was this before your illness? How true is this now, since your illness?                   | 1=Not at all<br>2=A little bit<br>3=Somewhat<br>4=Quite a bit<br>5=Very much | <u>Thinking about how your illness has affected you</u>, please rate how true this statement was of you <u>before your illness</u>, and again now, <u>since your illness</u>. |
| <b>b126</b> |  |  |  |  |  | II10 | PROMIS Illness Impact (Neg) | I believe I am a patient person<br>How true was this before your illness?<br>How true is this now, since your illness?       | 1=Not at all<br>2=A little bit<br>3=Somewhat<br>4=Quite a bit<br>5=Very much | <u>Thinking about how your illness has affected you</u>, please rate how true this statement was of you <u>before your illness</u>, and again now, <u>since your illness</u>. |
| <b>b126</b> |  |  |  |  |  | II11 | PROMIS Illness Impact (Neg) | I believe I am an honest person<br>How true was this before your illness?<br>How true is this now, since your illness?       | 1=Not at all<br>2=A little bit<br>3=Somewhat<br>4=Quite a bit<br>5=Very much | <u>Thinking about how your illness has affected you</u>, please rate how true this statement was of you <u>before your illness</u>, and again now, <u>since your illness</u>. |
| <b>b126</b> |  |  |  |  |  | II18 | PROMIS Illness Impact (Neg) | I am comfortable receiving help from others How true was this before your illness? How true is this now, since your illness? | 1=Not at all<br>2=A little bit<br>3=Somewhat<br>4=Quite a bit<br>5=Very much | <u>Thinking about how your illness has affected you</u>, please rate how true this statement was of you <u>before your illness</u>, and again now, <u>since your illness</u>. |
| <b>b126</b> |  |  |  |  |  | II25 | PROMIS Illness Impact (Neg) | I am able to accept the way things work out How true was this before your illness? How true is this now, since your illness? | 1=Not at all<br>2=A little bit<br>3=Somewhat<br>4=Quite a bit<br>5=Very much | <u>Thinking about how your illness has affected you</u>, please rate how true this statement was of you <u>before your illness</u>, and again now, <u>since your illness</u>. |

|             |  |  |  |  |  |      |                             |                                                                                                                               |                                                                              |                                                                                                                                                                               |
|-------------|--|--|--|--|--|------|-----------------------------|-------------------------------------------------------------------------------------------------------------------------------|------------------------------------------------------------------------------|-------------------------------------------------------------------------------------------------------------------------------------------------------------------------------|
| <b>b126</b> |  |  |  |  |  | II27 | PROMIS Illness Impact (Neg) | I can adjust to things I cannot change<br>How true was this before your illness?<br>How true is this now, since your illness? | 1=Not at all<br>2=A little bit<br>3=Somewhat<br>4=Quite a bit<br>5=Very much | <u>Thinking about how your illness has affected you</u>, please rate how true this statement was of you <u>before your illness</u>, and again now, <u>since your illness</u>. |
| <b>b126</b> |  |  |  |  |  | II28 | PROMIS Illness Impact (Neg) | I am able to take things as they come<br>How true was this before your illness?<br>How true is this now, since your illness?  | 1=Not at all<br>2=A little bit<br>3=Somewhat<br>4=Quite a bit<br>5=Very much | <u>Thinking about how your illness has affected you</u>, please rate how true this statement was of you <u>before your illness</u>, and again now, <u>since your illness</u>. |
| <b>b126</b> |  |  |  |  |  | II30 | PROMIS Illness Impact (Neg) | I tend to be accepting of things<br>How true was this before your illness?<br>How true is this now, since your illness?       | 1=Not at all<br>2=A little bit<br>3=Somewhat<br>4=Quite a bit<br>5=Very much | <u>Thinking about how your illness has affected you</u>, please rate how true this statement was of you <u>before your illness</u>, and again now, <u>since your illness</u>. |
| <b>b126</b> |  |  |  |  |  | II32 | PROMIS Illness Impact (Neg) | I look at things in a positive way<br>How true was this before your illness?<br>How true is this now, since your illness?     | 1=Not at all<br>2=A little bit<br>3=Somewhat<br>4=Quite a bit<br>5=Very much | <u>Thinking about how your illness has affected you</u>, please rate how true this statement was of you <u>before your illness</u>, and again now, <u>since your illness</u>. |
| <b>b126</b> |  |  |  |  |  | II33 | PROMIS Illness Impact (Neg) | I am able to feel joy<br>How true was this before your illness?<br>How true is this now, since your illness?                  | 1=Not at all<br>2=A little bit<br>3=Somewhat<br>4=Quite a bit<br>5=Very much | <u>Thinking about how your illness has affected you</u>, please rate how true this statement was of you <u>before your illness</u>, and again now, <u>since your illness</u>. |
| <b>b126</b> |  |  |  |  |  | II34 | PROMIS Illness Impact (Neg) | I am able to enjoy life<br>How true was this before your illness?<br>How true is this now, since your illness?                | 1=Not at all<br>2=A little bit<br>3=Somewhat<br>4=Quite a bit<br>5=Very much | <u>Thinking about how your illness has affected you</u>, please rate how true this statement was of you <u>before your illness</u>, and again now, <u>since your illness</u>. |

|             |  |  |  |  |  |      |                             |                                                                                                                    |                                                                              |                                                                                                                                                                               |
|-------------|--|--|--|--|--|------|-----------------------------|--------------------------------------------------------------------------------------------------------------------|------------------------------------------------------------------------------|-------------------------------------------------------------------------------------------------------------------------------------------------------------------------------|
| <b>b126</b> |  |  |  |  |  | II35 | PROMIS Illness Impact (Neg) | I can appreciate each day fully How true was this before your illness? How true is this now, since your illness?   | 1=Not at all<br>2=A little bit<br>3=Somewhat<br>4=Quite a bit<br>5=Very much | <u>Thinking about how your illness has affected you</u>, please rate how true this statement was of you <u>before your illness</u>, and again now, <u>since your illness</u>. |
| <b>b126</b> |  |  |  |  |  | II36 | PROMIS Illness Impact (Neg) | My life is meaningful How true was this before your illness? How true is this now, since your illness?             | 1=Not at all<br>2=A little bit<br>3=Somewhat<br>4=Quite a bit<br>5=Very much | <u>Thinking about how your illness has affected you</u>, please rate how true this statement was of you <u>before your illness</u>, and again now, <u>since your illness</u>. |
| <b>b126</b> |  |  |  |  |  | II37 | PROMIS Illness Impact (Neg) | I appreciate life How true was this before your illness? How true is this now, since your illness?                 | 1=Not at all<br>2=A little bit<br>3=Somewhat<br>4=Quite a bit<br>5=Very much | <u>Thinking about how your illness has affected you</u>, please rate how true this statement was of you <u>before your illness</u>, and again now, <u>since your illness</u>. |
| <b>b126</b> |  |  |  |  |  | II39 | PROMIS Illness Impact (Neg) | I have a sense of purpose in life How true was this before your illness? How true is this now, since your illness? | 1=Not at all<br>2=A little bit<br>3=Somewhat<br>4=Quite a bit<br>5=Very much | <u>Thinking about how your illness has affected you</u>, please rate how true this statement was of you <u>before your illness</u>, and again now, <u>since your illness</u>. |
| <b>b126</b> |  |  |  |  |  | II40 | PROMIS Illness Impact (Neg) | I feel peaceful How true was this before your illness? How true is this now, since your illness?                   | 1=Not at all<br>2=A little bit<br>3=Somewhat<br>4=Quite a bit<br>5=Very much | <u>Thinking about how your illness has affected you</u>, please rate how true this statement was of you <u>before your illness</u>, and again now, <u>since your illness</u>. |
| <b>b126</b> |  |  |  |  |  | II43 | PROMIS Illness Impact (Neg) | I have a sense of peace How true was this before your illness? How true is this now, since your illness?           | 1=Not at all<br>2=A little bit<br>3=Somewhat<br>4=Quite a bit<br>5=Very much | <u>Thinking about how your illness has affected you</u>, please rate how true this statement was of you <u>before your illness</u>, and again now, <u>since your illness</u>. |

|             |      |      |  |  |  |         |                               |                                                                                                                             |                                                                              |                                                                                                                                                                               |
|-------------|------|------|--|--|--|---------|-------------------------------|-----------------------------------------------------------------------------------------------------------------------------|------------------------------------------------------------------------------|-------------------------------------------------------------------------------------------------------------------------------------------------------------------------------|
| <b>b126</b> |      |      |  |  |  | II46    | PROMIS Illness Impact (Neg)   | I see what is really important in my life. How true was this before your illness? How true is this now, since your illness? | 1=Not at all<br>2=A little bit<br>3=Somewhat<br>4=Quite a bit<br>5=Very much | <u>Thinking about how your illness has affected you</u>, please rate how true this statement was of you <u>before your illness</u>, and again now, <u>since your illness</u>. |
| <b>b126</b> | d250 | d720 |  |  |  | EDANG10 | PROMIS Bank v1.0 - Anger      | When I was mad at someone, I gave them the silent treatment                                                                 | Never<br>Rarely<br>Sometimes<br>Often<br>Always                              | In the past 7 days                                                                                                                                                            |
| <b>b126</b> | d710 |      |  |  |  | EDANG05 | PROMIS Bank v1.0 - Anger      | I disagreed with people                                                                                                     | Never<br>Rarely<br>Sometimes<br>Often<br>Always                              | In the past 7 days                                                                                                                                                            |
| <b>b126</b> | d720 |      |  |  |  | EDANG07 | PROMIS Bank v1.0 - Anger      | I tried to get even when I was angry with someone                                                                           | Never<br>Rarely<br>Sometimes<br>Often<br>Always                              | In the past 7 days                                                                                                                                                            |
| <b>b126</b> | d901 |      |  |  |  | EDANX24 | PROMIS Bank v1.0 - Anxiety    | I avoided public places or activities                                                                                       | Never<br>Rarely<br>Sometimes<br>Often<br>Always                              | In the past 7 days                                                                                                                                                            |
| <b>b126</b> |      |      |  |  |  | EDDEP07 | PROMIS Bank v1.0 - Depression | I withdrew from other people                                                                                                | Never<br>Rarely<br>Sometimes<br>Often<br>Always                              | In the past 7 days                                                                                                                                                            |
| <b>b126</b> |      |      |  |  |  | EDDEP09 | PROMIS Bank v1.0 - Depression | I felt that nothing could cheer me up                                                                                       | Never<br>Rarely<br>Sometimes<br>Often<br>Always                              | In the past 7 days                                                                                                                                                            |
| <b>b126</b> |      |      |  |  |  | EDDEP21 | PROMIS Bank v1.0 - Depression | I felt that I was to blame for things                                                                                       | Never<br>Rarely<br>Sometimes<br>Often<br>Always                              | In the past 7 days                                                                                                                                                            |
| <b>b126</b> |      |      |  |  |  | EDDEP22 | PROMIS Bank v1.0 - Depression | I felt like a failure                                                                                                       | Never<br>Rarely<br>Sometimes<br>Often<br>Always                              | In the past 7 days                                                                                                                                                            |

|             |      |      |  |  |  |          |                                  |                                                                                                                          |                                                 |                    |
|-------------|------|------|--|--|--|----------|----------------------------------|--------------------------------------------------------------------------------------------------------------------------|-------------------------------------------------|--------------------|
| <b>b126</b> |      |      |  |  |  | EDDEP23  | PROMIS Bank<br>v1.0 - Depression | I had trouble feeling close to people                                                                                    | Never<br>Rarely<br>Sometimes<br>Often<br>Always | In the past 7 days |
| <b>b126</b> |      |      |  |  |  | EDDEP26  | PROMIS Bank<br>v1.0 - Depression | I felt disappointed in myself                                                                                            | Never<br>Rarely<br>Sometimes<br>Often<br>Always | In the past 7 days |
| <b>b126</b> |      |      |  |  |  | EDDEP27  | PROMIS Bank<br>v1.0 - Depression | I felt that I was not needed                                                                                             | Never<br>Rarely<br>Sometimes<br>Often<br>Always | In the past 7 days |
| <b>b126</b> |      |      |  |  |  | EDDEP46  | PROMIS Bank<br>v1.0 - Depression | I felt pessimistic                                                                                                       | Never<br>Rarely<br>Sometimes<br>Often<br>Always | In the past 7 days |
| <b>b130</b> | d640 | d850 |  |  |  | FATIMP5  | PROMIS Bank<br>v1.0 - Fatigue    | How often were you less effective at work due to your fatigue (include work at home)?                                    | Never<br>Rarely<br>Sometimes<br>Often<br>Always | In the past 7 days |
| <b>b130</b> | d920 |      |  |  |  | FATIMP8  | PROMIS Bank<br>v1.0 - Fatigue    | How often were you too tired to watch television?                                                                        | Never<br>Rarely<br>Sometimes<br>Often<br>Always | In the past 7 days |
| <b>b130</b> | b126 |      |  |  |  | FATEXP28 | PROMIS Bank<br>v1.0 - Fatigue    | How often were you too tired to feel happy?                                                                              | Never<br>Rarely<br>Sometimes<br>Often<br>Always | In the past 7 days |
| <b>b130</b> | b140 | d6   |  |  |  | FATIMP14 | PROMIS Bank<br>v1.0 - Fatigue    | How often did your fatigue make it difficult to organize your thoughts when doing things at work (include work at home)? | Never<br>Rarely<br>Sometimes<br>Often<br>Always | In the past 7 days |
| <b>b130</b> | b140 | d6   |  |  |  | FATIMP22 | PROMIS Bank<br>v1.0 - Fatigue    | How often did your fatigue make it difficult to organize your thoughts when doing things at home?                        | Never<br>Rarely<br>Sometimes<br>Often<br>Always | In the past 7 days |

|             |      |      |      |  |  |          |                            |                                                                                |                                                 |                    |
|-------------|------|------|------|--|--|----------|----------------------------|--------------------------------------------------------------------------------|-------------------------------------------------|--------------------|
| <b>b130</b> | b144 |      |      |  |  | FATIMP11 | PROMIS Bank v1.0 - Fatigue | How often did your fatigue make you more forgetful?                            | Never<br>Rarely<br>Sometimes<br>Often<br>Always | In the past 7 days |
| <b>b130</b> | b160 |      |      |  |  | FATIMP30 | PROMIS Bank v1.0 - Fatigue | How often were you too tired to think clearly?                                 | Never<br>Rarely<br>Sometimes<br>Often<br>Always | In the past 7 days |
| <b>b130</b> | b164 |      |      |  |  | FATIMP17 | PROMIS Bank v1.0 - Fatigue | How often did your fatigue make it difficult to make decisions?                | Never<br>Rarely<br>Sometimes<br>Often<br>Always | In the past 7 days |
| <b>b130</b> | b455 | d920 | d570 |  |  | FATIMP40 | PROMIS Bank v1.0 - Fatigue | How often did you have enough energy to exercise strenuously?                  | Never<br>Rarely<br>Sometimes<br>Often<br>Always | In the past 7 days |
| <b>b130</b> | d210 |      |      |  |  | FATIMP16 | PROMIS Bank v1.0 - Fatigue | How often did you have trouble finishing things because of your fatigue?       | Never<br>Rarely<br>Sometimes<br>Often<br>Always | In the past 7 days |
| <b>b130</b> | d210 |      |      |  |  | FATIMP24 | PROMIS Bank v1.0 - Fatigue | How often did you have trouble starting things because of your fatigue?        | Never<br>Rarely<br>Sometimes<br>Often<br>Always | In the past 7 days |
| <b>b130</b> | d350 |      |      |  |  | FATIMP25 | PROMIS Bank v1.0 - Fatigue | How often was it an effort to carry on a conversation because of your fatigue? | Never<br>Rarely<br>Sometimes<br>Often<br>Always | In the past 7 days |
| <b>b130</b> | d450 |      |      |  |  | FATIMP53 | PROMIS Bank v1.0 - Fatigue | How often were you too tired to take a short walk?                             | Never<br>Rarely<br>Sometimes<br>Often<br>Always | In the past 7 days |
| <b>b130</b> | d460 |      |      |  |  | FATIMP29 | PROMIS Bank v1.0 - Fatigue | How often were you too tired to leave the house?                               | Never<br>Rarely<br>Sometimes<br>Often<br>Always | In the past 7 days |



|             |               |      |  |  |  |          |                            |                                                                                              |                                                 |                    |
|-------------|---------------|------|--|--|--|----------|----------------------------|----------------------------------------------------------------------------------------------|-------------------------------------------------|--------------------|
| <b>b130</b> | d510          |      |  |  |  | FATIMP21 | PROMIS Bank v1.0 - Fatigue | How often were you too tired to take a bath or shower?                                       | Never<br>Rarely<br>Sometimes<br>Often<br>Always | In the past 7 days |
| <b>b130</b> | d620          |      |  |  |  | FATIMP13 | PROMIS Bank v1.0 - Fatigue | How often were you too tired to do errands?                                                  | Never<br>Rarely<br>Sometimes<br>Often<br>Always | In the past 7 days |
| <b>b130</b> | d640          |      |  |  |  | FATIMP19 | PROMIS Bank v1.0 - Fatigue | How often were you too tired to do your household chores?                                    | Never<br>Rarely<br>Sometimes<br>Often<br>Always | In the past 7 days |
| <b>b130</b> | d770          | d760 |  |  |  | FATIMP26 | PROMIS Bank v1.0 - Fatigue | How often were you too tired to socialize with your family?                                  | Never<br>Rarely<br>Sometimes<br>Often<br>Always | In the past 7 days |
| <b>b130</b> | d840-<br>d859 |      |  |  |  | FATIMP33 | PROMIS Bank v1.0 - Fatigue | How often did your fatigue limit you at work (include work at home)?                         | Never<br>Rarely<br>Sometimes<br>Often<br>Always | In the past 7 days |
| <b>b130</b> | d845          | d6   |  |  |  | FATIMP42 | PROMIS Bank v1.0 - Fatigue | How often were you less effective at home due to your fatigue?                               | Never<br>Rarely<br>Sometimes<br>Often<br>Always | In the past 7 days |
| <b>b130</b> | d910          |      |  |  |  | FATIMP4  | PROMIS Bank v1.0 - Fatigue | How often did your fatigue interfere with your social activities?                            | Never<br>Rarely<br>Sometimes<br>Often<br>Always | In the past 7 days |
| <b>b130</b> | d920          | d750 |  |  |  | FATIMP56 | PROMIS Bank v1.0 - Fatigue | How often were you too tired to socialize with your friends?                                 | Never<br>Rarely<br>Sometimes<br>Often<br>Always | In the past 7 days |
| <b>b130</b> | d920          |      |  |  |  | FATIMP15 | PROMIS Bank v1.0 - Fatigue | How often did your fatigue interfere with your ability to engage in recreational activities? | Never<br>Rarely<br>Sometimes<br>Often<br>Always | In the past 7 days |

|             |      |  |  |  |  |          |                               |                                                                                           |                                                 |                    |
|-------------|------|--|--|--|--|----------|-------------------------------|-------------------------------------------------------------------------------------------|-------------------------------------------------|--------------------|
| <b>b130</b> | d920 |  |  |  |  | FATIMP18 | PROMIS Bank<br>v1.0 - Fatigue | How often did you have to limit your social activities because of your fatigue?           | Never<br>Rarely<br>Sometimes<br>Often<br>Always | In the past 7 days |
| <b>b130</b> | d920 |  |  |  |  | FATEXP24 | PROMIS Bank<br>v1.0 - Fatigue | How often did you have enough energy to enjoy the things you do for fun?                  | Never<br>Rarely<br>Sometimes<br>Often<br>Always | In the past 7 days |
| <b>b130</b> |      |  |  |  |  | FATIMP3  | PROMIS Bank<br>v1.0 - Fatigue | How often did you have to push yourself to get things done because of your fatigue?       | Never<br>Rarely<br>Sometimes<br>Often<br>Always | In the past 7 days |
| <b>b130</b> |      |  |  |  |  | FATIMP10 | PROMIS Bank<br>v1.0 - Fatigue | How often did your fatigue make it difficult to start anything new?                       | Never<br>Rarely<br>Sometimes<br>Often<br>Always | In the past 7 days |
| <b>b130</b> |      |  |  |  |  | FATIMP20 | PROMIS Bank<br>v1.0 - Fatigue | How often did your fatigue make you feel less alert?                                      | Never<br>Rarely<br>Sometimes<br>Often<br>Always | In the past 7 days |
| <b>b130</b> |      |  |  |  |  | FATIMP55 | PROMIS Bank<br>v1.0 - Fatigue | How often did you have to force yourself to get up and do things because of your fatigue? | Never<br>Rarely<br>Sometimes<br>Often<br>Always | In the past 7 days |
| <b>b130</b> |      |  |  |  |  | FATEXP2  | PROMIS Bank<br>v1.0 - Fatigue | How often did you feel run-down?                                                          | Never<br>Rarely<br>Sometimes<br>Often<br>Always | In the past 7 days |
| <b>b130</b> |      |  |  |  |  | FATEXP5  | PROMIS Bank<br>v1.0 - Fatigue | How often did you experience extreme exhaustion?                                          | Never<br>Rarely<br>Sometimes<br>Often<br>Always | In the past 7 days |
| <b>b130</b> |      |  |  |  |  | FATEXP6  | PROMIS Bank<br>v1.0 - Fatigue | How often did you feel tired even when you hadn't done anything?                          | Never<br>Rarely<br>Sometimes<br>Often<br>Always | In the past 7 days |

|             |  |  |  |  |  |          |                               |                                                              |                                                 |                    |
|-------------|--|--|--|--|--|----------|-------------------------------|--------------------------------------------------------------|-------------------------------------------------|--------------------|
| <b>b130</b> |  |  |  |  |  | FATEXP7  | PROMIS Bank<br>v1.0 - Fatigue | How often did you feel your fatigue was beyond your control? | Never<br>Rarely<br>Sometimes<br>Often<br>Always | In the past 7 days |
| <b>b130</b> |  |  |  |  |  | FATEXP16 | PROMIS Bank<br>v1.0 - Fatigue | How often were you sluggish?                                 | Never<br>Rarely<br>Sometimes<br>Often<br>Always | In the past 7 days |
| <b>b130</b> |  |  |  |  |  | FATEXP18 | PROMIS Bank<br>v1.0 - Fatigue | How often did you run out of energy?                         | Never<br>Rarely<br>Sometimes<br>Often<br>Always | In the past 7 days |
| <b>b130</b> |  |  |  |  |  | FATEXP19 | PROMIS Bank<br>v1.0 - Fatigue | How often were you physically drained?                       | Never<br>Rarely<br>Sometimes<br>Often<br>Always | In the past 7 days |
| <b>b130</b> |  |  |  |  |  | FATEXP20 | PROMIS Bank<br>v1.0 - Fatigue | How often did you feel tired?                                | Never<br>Rarely<br>Sometimes<br>Often<br>Always | In the past 7 days |
| <b>b130</b> |  |  |  |  |  | FATEXP22 | PROMIS Bank<br>v1.0 - Fatigue | How often were you bothered by your fatigue?                 | Never<br>Rarely<br>Sometimes<br>Often<br>Always | In the past 7 days |
| <b>b130</b> |  |  |  |  |  | FATEXP26 | PROMIS Bank<br>v1.0 - Fatigue | How often were you too tired to enjoy life?                  | Never<br>Rarely<br>Sometimes<br>Often<br>Always | In the past 7 days |
| <b>b130</b> |  |  |  |  |  | FATEXP29 | PROMIS Bank<br>v1.0 - Fatigue | How often did you feel totally drained?                      | Never<br>Rarely<br>Sometimes<br>Often<br>Always | In the past 7 days |
| <b>b130</b> |  |  |  |  |  | FATEXP31 | PROMIS Bank<br>v1.0 - Fatigue | How often were you energetic?                                | Never<br>Rarely<br>Sometimes<br>Often<br>Always | In the past 7 days |

|             |       |  |  |  |  |          |                                                       |                                                                                                |                                                                    |                         |
|-------------|-------|--|--|--|--|----------|-------------------------------------------------------|------------------------------------------------------------------------------------------------|--------------------------------------------------------------------|-------------------------|
| <b>b130</b> |       |  |  |  |  | FATEXP48 | PROMIS Bank<br>v1.0 - Fatigue                         | How often did you find yourself getting tired easily?                                          | Never<br>Rarely<br>Sometimes<br>Often<br>Always                    | In the past 7 days      |
| <b>b130</b> |       |  |  |  |  | FATEXP49 | PROMIS Bank<br>v1.0 - Fatigue                         | How often did you think about your fatigue?                                                    | Never<br>Rarely<br>Sometimes<br>Often<br>Always                    | In the past 7 days      |
| <b>b130</b> |       |  |  |  |  | FATEXP54 | PROMIS Bank<br>v1.0 - Fatigue                         | How often did you have physical energy?                                                        | Never<br>Rarely<br>Sometimes<br>Often<br>Always                    | In the past 7 days      |
| <b>b130</b> |       |  |  |  |  | Sleep19  | PROMIS Bank<br>v1.0 - Sleep-<br>Related<br>Impairment | I tried to sleep whenever I could.                                                             | Never<br>Rarely<br>Sometimes<br>Often<br>Always                    | In the past 7 days      |
| <b>b130</b> |       |  |  |  |  | Sleep29  | PROMIS Bank<br>v1.0 - Sleep-<br>Related<br>Impairment | My daytime activities were disturbed by poor sleep.                                            | Never<br>Rarely<br>Sometimes<br>Often<br>Always                    | In the past 7 days      |
| <b>b130</b> |       |  |  |  |  | FATEXP46 | PROMIS Bank<br>v1.0 - Fatigue                         | On how many days was your fatigue worse in the morning?                                        | None<br>1 day<br>2-3 days<br>4-5 days<br>6-7 days                  | In the past 7 days      |
| <b>b130</b> |       |  |  |  |  | FATEXP56 | PROMIS Bank<br>v1.0 - Fatigue                         | What was the level of your fatigue on most days?                                               | None<br>Mild<br>Moderate<br>Severe<br>Very severe                  | In the past 7 days      |
| <b>b130</b> | b126  |  |  |  |  | AN1      | PROMIS Bank<br>v1.0 - Fatigue                         | I feel listless (washed out)"                                                                  | Not at all<br>A little bit<br>Somewhat<br>Quite a bit<br>Very much | During the past 7 days: |
| <b>b130</b> | b1300 |  |  |  |  | FATIMP47 | PROMIS Bank<br>v1.0 - Fatigue                         | To what degree did you have to force yourself to get up and do things because of your fatigue? | Not at all<br>A little bit<br>Somewhat<br>Quite a bit<br>Very much | In the past 7 days      |

|             |      |    |  |  |  |          |                            |                                                                                                        |                                                                    |                    |
|-------------|------|----|--|--|--|----------|----------------------------|--------------------------------------------------------------------------------------------------------|--------------------------------------------------------------------|--------------------|
| <b>b130</b> | b140 | d6 |  |  |  | FATIMP35 | PROMIS Bank v1.0 - Fatigue | To what degree did your fatigue make it difficult to organize your thoughts when doing things at home? | Not at all<br>A little bit<br>Somewhat<br>Quite a bit<br>Very much | In the past 7 days |
| <b>b130</b> | b144 |    |  |  |  | FATIMP44 | PROMIS Bank v1.0 - Fatigue | To what degree did your fatigue make you more forgetful?                                               | Not at all<br>A little bit<br>Somewhat<br>Quite a bit<br>Very much | In the past 7 days |
| <b>b130</b> | b160 |    |  |  |  | FATIMP2  | PROMIS Bank v1.0 - Fatigue | To what degree did your fatigue make you feel slowed down in your thinking?                            | Not at all<br>A little bit<br>Somewhat<br>Quite a bit<br>Very much | In the past 7 days |
| <b>b130</b> | b164 |    |  |  |  | FATIMP38 | PROMIS Bank v1.0 - Fatigue | To what degree did your fatigue make it difficult to make decisions?                                   | Not at all<br>A little bit<br>Somewhat<br>Quite a bit<br>Very much | In the past 7 days |
| <b>b130</b> | b455 |    |  |  |  | FATEXP43 | PROMIS Bank v1.0 - Fatigue | How physically drained were you on average?                                                            | Not at all<br>A little bit<br>Somewhat<br>Quite a bit<br>Very much | In the past 7 days |
| <b>b130</b> | b760 | d4 |  |  |  | FATIMP49 | PROMIS Bank v1.0 - Fatigue | To what degree did your fatigue interfere with your physical functioning?                              | Not at all<br>A little bit<br>Somewhat<br>Quite a bit<br>Very much | In the past 7 days |
| <b>b130</b> | b920 |    |  |  |  | FATIMP34 | PROMIS Bank v1.0 - Fatigue | To what degree did you have to limit your social activities because of your fatigue?                   | Not at all<br>A little bit<br>Somewhat<br>Quite a bit<br>Very much | In the past 7 days |
| <b>b130</b> | d210 |    |  |  |  | FATIMP27 | PROMIS Bank v1.0 - Fatigue | To what degree did you have trouble starting things because of your fatigue?                           | Not at all<br>A little bit<br>Somewhat<br>Quite a bit<br>Very much | In the past 7 days |
| <b>b130</b> | d210 |    |  |  |  | FATIMP36 | PROMIS Bank v1.0 - Fatigue | To what degree did your fatigue make it difficult to start anything new?                               | Not at all<br>A little bit<br>Somewhat<br>Quite a bit<br>Very much | In the past 7 days |

|             |               |    |  |  |  |          |                            |                                                                                                                               |                                                                    |                         |
|-------------|---------------|----|--|--|--|----------|----------------------------|-------------------------------------------------------------------------------------------------------------------------------|--------------------------------------------------------------------|-------------------------|
| <b>b130</b> | d210          |    |  |  |  | FATIMP51 | PROMIS Bank v1.0 - Fatigue | To what degree did you have trouble finishing things because of your fatigue?                                                 | Not at all<br>A little bit<br>Somewhat<br>Quite a bit<br>Very much | In the past 7 days      |
| <b>b130</b> | d210          |    |  |  |  | An3      | PROMIS Bank v1.0 - Fatigue | I have trouble <U>starting</U> things because I am tired                                                                      | Not at all<br>A little bit<br>Somewhat<br>Quite a bit<br>Very much | During the past 7 days: |
| <b>b130</b> | d210          |    |  |  |  | An4      | PROMIS Bank v1.0 - Fatigue | I have trouble <U>finishing</U> things because I am tired                                                                     | Not at all<br>A little bit<br>Somewhat<br>Quite a bit<br>Very much | During the past 7 days: |
| <b>b130</b> | d230          |    |  |  |  | FATIMP1  | PROMIS Bank v1.0 - Fatigue | To what degree did you have to push yourself to get things done because of your fatigue?                                      | Not at all<br>A little bit<br>Somewhat<br>Quite a bit<br>Very much | In the past 7 days      |
| <b>b130</b> | d350          |    |  |  |  | FATIMP28 | PROMIS Bank v1.0 - Fatigue | How hard was it for you to carry on a conversation because of your fatigue?                                                   | Not at all<br>A little bit<br>Somewhat<br>Quite a bit<br>Very much | In the past 7 days      |
| <b>b130</b> | d550          |    |  |  |  | An12     | PROMIS Bank v1.0 - Fatigue | I am too tired to eat                                                                                                         | Not at all<br>A little bit<br>Somewhat<br>Quite a bit<br>Very much | During the past 7 days: |
| <b>b130</b> | d640          |    |  |  |  | FATIMP50 | PROMIS Bank v1.0 - Fatigue | Did fatigue make you less effective at home?                                                                                  | Not at all<br>A little bit<br>Somewhat<br>Quite a bit<br>Very much | In the past 7 days      |
| <b>b130</b> | d840-<br>d859 |    |  |  |  | FATIMP37 | PROMIS Bank v1.0 - Fatigue | Due to your fatigue were you less effective at work (include work at home)?                                                   | Not at all<br>A little bit<br>Somewhat<br>Quite a bit<br>Very much | In the past 7 days      |
| <b>b130</b> | d845          | d6 |  |  |  | FATIMP43 | PROMIS Bank v1.0 - Fatigue | To what degree did your fatigue make it difficult to organize your thoughts when doing things at work (include work at home)? | Not at all<br>A little bit<br>Somewhat<br>Quite a bit<br>Very much | In the past 7 days      |

|             |      |      |  |  |  |          |                            |                                                                                                   |                                                                    |                         |
|-------------|------|------|--|--|--|----------|----------------------------|---------------------------------------------------------------------------------------------------|--------------------------------------------------------------------|-------------------------|
| <b>b130</b> | d910 |      |  |  |  | FATIMP48 | PROMIS Bank v1.0 - Fatigue | To what degree did your fatigue interfere with your social activities?                            | Not at all<br>A little bit<br>Somewhat<br>Quite a bit<br>Very much | In the past 7 days      |
| <b>b130</b> | d920 | d230 |  |  |  | An15     | PROMIS Bank v1.0 - Fatigue | I am frustrated by being too tired to do the things I want to do                                  | Not at all<br>A little bit<br>Somewhat<br>Quite a bit<br>Very much | During the past 7 days: |
| <b>b130</b> | d920 |      |  |  |  | FATIMP45 | PROMIS Bank v1.0 - Fatigue | To what degree did your fatigue interfere with your ability to engage in recreational activities? | Not at all<br>A little bit<br>Somewhat<br>Quite a bit<br>Very much | In the past 7 days      |
| <b>b130</b> | d920 |      |  |  |  | An16     | PROMIS Bank v1.0 - Fatigue | I have to limit my social activity because I am tired                                             | Not at all<br>A little bit<br>Somewhat<br>Quite a bit<br>Very much | During the past 7 days: |
| <b>b130</b> |      |      |  |  |  | FATIMP52 | PROMIS Bank v1.0 - Fatigue | To what degree did your fatigue make you feel less alert?                                         | Not at all<br>A little bit<br>Somewhat<br>Quite a bit<br>Very much | In the past 7 days      |
| <b>b130</b> |      |      |  |  |  | FATEXP12 | PROMIS Bank v1.0 - Fatigue | To what degree did you feel tired even when you hadn't done anything?                             | Not at all<br>A little bit<br>Somewhat<br>Quite a bit<br>Very much | In the past 7 days      |
| <b>b130</b> |      |      |  |  |  | FATEXP13 | PROMIS Bank v1.0 - Fatigue | How bushed were you on average?                                                                   | Not at all<br>A little bit<br>Somewhat<br>Quite a bit<br>Very much | In the past 7 days      |
| <b>b130</b> |      |      |  |  |  | FATEXP21 | PROMIS Bank v1.0 - Fatigue | How fatigued were you when your fatigue was at its worst?                                         | Not at all<br>A little bit<br>Somewhat<br>Quite a bit<br>Very much | In the past 7 days      |
| <b>b130</b> |      |      |  |  |  | FATEXP34 | PROMIS Bank v1.0 - Fatigue | How tired did you feel on average?                                                                | Not at all<br>A little bit<br>Somewhat<br>Quite a bit<br>Very much | In the past 7 days      |

|             |  |  |  |  |  |          |                               |                                                              |                                                                    |                    |
|-------------|--|--|--|--|--|----------|-------------------------------|--------------------------------------------------------------|--------------------------------------------------------------------|--------------------|
| <b>b130</b> |  |  |  |  |  | FATEXP35 | PROMIS Bank<br>v1.0 - Fatigue | How much were you bothered by your<br>fatigue on average?    | Not at all<br>A little bit<br>Somewhat<br>Quite a bit<br>Very much | In the past 7 days |
| <b>b130</b> |  |  |  |  |  | FATEXP36 | PROMIS Bank<br>v1.0 - Fatigue | How exhausted were you on<br>average?                        | Not at all<br>A little bit<br>Somewhat<br>Quite a bit<br>Very much | In the past 7 days |
| <b>b130</b> |  |  |  |  |  | FATEXP38 | PROMIS Bank<br>v1.0 - Fatigue | How fatigued were you on the day you<br>felt most fatigued?  | Not at all<br>A little bit<br>Somewhat<br>Quite a bit<br>Very much | In the past 7 days |
| <b>b130</b> |  |  |  |  |  | FATEXP40 | PROMIS Bank<br>v1.0 - Fatigue | How fatigued were you on average?                            | Not at all<br>A little bit<br>Somewhat<br>Quite a bit<br>Very much | In the past 7 days |
| <b>b130</b> |  |  |  |  |  | FATEXP41 | PROMIS Bank<br>v1.0 - Fatigue | How run-down did you feel on<br>average?                     | Not at all<br>A little bit<br>Somewhat<br>Quite a bit<br>Very much | In the past 7 days |
| <b>b130</b> |  |  |  |  |  | FATEXP42 | PROMIS Bank<br>v1.0 - Fatigue | How much mental energy did you<br>have on average?           | Not at all<br>A little bit<br>Somewhat<br>Quite a bit<br>Very much | In the past 7 days |
| <b>b130</b> |  |  |  |  |  | FATEXP44 | PROMIS Bank<br>v1.0 - Fatigue | How energetic were you on average?                           | Not at all<br>A little bit<br>Somewhat<br>Quite a bit<br>Very much | In the past 7 days |
| <b>b130</b> |  |  |  |  |  | FATEXP45 | PROMIS Bank<br>v1.0 - Fatigue | How sluggish were you on average?                            | Not at all<br>A little bit<br>Somewhat<br>Quite a bit<br>Very much | In the past 7 days |
| <b>b130</b> |  |  |  |  |  | FATEXP50 | PROMIS Bank<br>v1.0 - Fatigue | How fatigued were you on the day you<br>felt least fatigued? | Not at all<br>A little bit<br>Somewhat<br>Quite a bit<br>Very much | In the past 7 days |



|             |      |  |  |  |  |          |                                             |                                                            |                                                                    |                         |
|-------------|------|--|--|--|--|----------|---------------------------------------------|------------------------------------------------------------|--------------------------------------------------------------------|-------------------------|
| <b>b130</b> |      |  |  |  |  | FATEXP51 | PROMIS Bank v1.0 - Fatigue                  | How easily did you find yourself getting tired on average? | Not at all<br>A little bit<br>Somewhat<br>Quite a bit<br>Very much | In the past 7 days      |
| <b>b130</b> |      |  |  |  |  | FATEXP52 | PROMIS Bank v1.0 - Fatigue                  | How wiped out were you on average?                         | Not at all<br>A little bit<br>Somewhat<br>Quite a bit<br>Very much | In the past 7 days      |
| <b>b130</b> |      |  |  |  |  | HI7      | PROMIS Bank v1.0 - Fatigue                  | I feel fatigued                                            | Not at all<br>A little bit<br>Somewhat<br>Quite a bit<br>Very much | During the past 7 days: |
| <b>b130</b> |      |  |  |  |  | HI12     | PROMIS Bank v1.0 - Fatigue                  | I feel weak all over                                       | Not at all<br>A little bit<br>Somewhat<br>Quite a bit<br>Very much | During the past 7 days: |
| <b>b130</b> |      |  |  |  |  | An2      | PROMIS Bank v1.0 - Fatigue                  | I feel tired                                               | Not at all<br>A little bit<br>Somewhat<br>Quite a bit<br>Very much | During the past 7 days: |
| <b>b130</b> |      |  |  |  |  | An8      | PROMIS Bank v1.0 - Fatigue                  | I need to sleep during the day                             | Not at all<br>A little bit<br>Somewhat<br>Quite a bit<br>Very much | During the past 7 days: |
| <b>b130</b> |      |  |  |  |  | An5      | PROMIS Bank v1.0 - Fatigue                  | I have energy                                              | Not at all<br>A little bit<br>Somewhat<br>Quite a bit<br>Very much | During the past 7 days: |
| <b>b130</b> | b110 |  |  |  |  | Sleep11  | PROMIS Bank v1.0 - Sleep-Related Impairment | I had a hard time concentrating because I was sleepy.      | Not at all<br>A little bit<br>Somewhat<br>Quite a bit<br>Very much | In the past 7 days      |
| <b>b130</b> | b110 |  |  |  |  | Sleep27  | PROMIS Bank v1.0 - Sleep-Related Impairment | I had a hard time concentrating because of poor sleep.     | Not at all<br>A little bit<br>Somewhat<br>Quite a bit<br>Very much | In the past 7 days      |

|             |      |  |  |  |  |          |                                             |                                                                  |                                                                    |                    |
|-------------|------|--|--|--|--|----------|---------------------------------------------|------------------------------------------------------------------|--------------------------------------------------------------------|--------------------|
| <b>b130</b> | b110 |  |  |  |  | Sleep124 | PROMIS Bank v1.0 - Sleep-Related Impairment | I still felt sleepy when I woke up.                              | Not at all<br>A little bit<br>Somewhat<br>Quite a bit<br>Very much | In the past 7 days |
| <b>b130</b> | b110 |  |  |  |  | Sleep119 | PROMIS Bank v1.0 - Sleep-Related Impairment | I felt alert when I woke up.                                     | Not at all<br>A little bit<br>Somewhat<br>Quite a bit<br>Very much | In the past 7 days |
| <b>b130</b> | b126 |  |  |  |  | Sleep30  | PROMIS Bank v1.0 - Sleep-Related Impairment | I felt irritable because of poor sleep.                          | Not at all<br>A little bit<br>Somewhat<br>Quite a bit<br>Very much | In the past 7 days |
| <b>b130</b> | b230 |  |  |  |  | Sleep10  | PROMIS Bank v1.0 - Sleep-Related Impairment | I had a hard time getting things done because I was sleepy.      | Not at all<br>A little bit<br>Somewhat<br>Quite a bit<br>Very much | In the past 7 days |
| <b>b130</b> |      |  |  |  |  | Sleep6   | PROMIS Bank v1.0 - Sleep-Related Impairment | I was sleepy during the daytime.                                 | Not at all<br>A little bit<br>Somewhat<br>Quite a bit<br>Very much | In the past 7 days |
| <b>b130</b> |      |  |  |  |  | Sleep7   | PROMIS Bank v1.0 - Sleep-Related Impairment | I had trouble staying awake during the day.                      | Not at all<br>A little bit<br>Somewhat<br>Quite a bit<br>Very much | In the past 7 days |
| <b>b130</b> |      |  |  |  |  | Sleep18  | PROMIS Bank v1.0 - Sleep-Related Impairment | I felt tired.                                                    | Not at all<br>A little bit<br>Somewhat<br>Quite a bit<br>Very much | In the past 7 days |
| <b>b130</b> |      |  |  |  |  | Sleep25  | PROMIS Bank v1.0 - Sleep-Related Impairment | I had problems during the day because of poor sleep.             | Not at all<br>A little bit<br>Somewhat<br>Quite a bit<br>Very much | In the past 7 days |
| <b>b130</b> |      |  |  |  |  | Sleep33  | PROMIS Bank v1.0 - Sleep-Related Impairment | I had a hard time controlling my emotions because of poor sleep. | Not at all<br>A little bit<br>Somewhat<br>Quite a bit<br>Very much | In the past 7 days |

|              |  |  |  |  |  |          |                                             |                                                  |                                                                    |                      |
|--------------|--|--|--|--|--|----------|---------------------------------------------|--------------------------------------------------|--------------------------------------------------------------------|----------------------|
| <b>b130</b>  |  |  |  |  |  | Sleep4   | PROMIS Bank v1.0 - Sleep-Related Impairment | I had enough energy.                             | Not at all<br>A little bit<br>Somewhat<br>Quite a bit<br>Very much | In the past 7 days   |
| <b>b130</b>  |  |  |  |  |  | Sleep120 | PROMIS Bank v1.0 - Sleep-Related Impairment | When I woke up I felt ready to start the day.    | Not at all<br>A little bit<br>Somewhat<br>Quite a bit<br>Very much | In the past 7 days   |
| <b>b1303</b> |  |  |  |  |  | POCO01   | Alcohol - Positive Consequences             | My future seemed better when I drank             |                                                                    | In the past 30 days, |
| <b>b1303</b> |  |  |  |  |  | POCO02   | Alcohol - Positive Consequences             | I was able to express myself better when I drank |                                                                    | In the past 30 days, |
| <b>b1303</b> |  |  |  |  |  | POCO03   | Alcohol - Positive Consequences             | I felt comfortable around others when I drank    |                                                                    | In the past 30 days, |
| <b>b1303</b> |  |  |  |  |  | POCO04   | Alcohol - Positive Consequences             | I felt relaxed when I drank                      |                                                                    | In the past 30 days, |
| <b>b1303</b> |  |  |  |  |  | POCO05   | Alcohol - Positive Consequences             | I felt at ease when I drank                      |                                                                    | In the past 30 days, |
| <b>b1303</b> |  |  |  |  |  | POCO06   | Alcohol - Positive Consequences             | I felt good about myself when I drank            |                                                                    | In the past 30 days, |
| <b>b1303</b> |  |  |  |  |  | POCO07   | Alcohol - Positive Consequences             | I felt happy when I drank                        |                                                                    | In the past 30 days, |
| <b>b1303</b> |  |  |  |  |  | POCO08   | Alcohol - Positive Consequences             | I felt a sense of control when I drank           |                                                                    | In the past 30 days, |
| <b>b1303</b> |  |  |  |  |  | POCO09   | Alcohol - Positive Consequences             | I felt like I could do anything when I drank     |                                                                    | In the past 30 days, |
| <b>b1303</b> |  |  |  |  |  | POCO10   | Alcohol - Positive Consequences             | I calmed down when I drank                       |                                                                    | In the past 30 days, |
| <b>b1303</b> |  |  |  |  |  | POCO12   | Alcohol - Positive Consequences             | I felt creative when I drank                     |                                                                    | In the past 30 days, |
| <b>b1303</b> |  |  |  |  |  | POCO13   | Alcohol - Positive Consequences             | I felt outgoing when I drank                     |                                                                    | In the past 30 days, |

|              |  |  |  |  |  |             |                                                       |                                                                     |  |                      |
|--------------|--|--|--|--|--|-------------|-------------------------------------------------------|---------------------------------------------------------------------|--|----------------------|
| <b>b1303</b> |  |  |  |  |  | POCO14      | Alcohol - Positive Consequences                       | I enjoyed life when I drank                                         |  | In the past 30 days, |
| <b>b1303</b> |  |  |  |  |  | POCO15      | Alcohol - Positive Consequences                       | I felt confident when I drank                                       |  | In the past 30 days, |
| <b>b1303</b> |  |  |  |  |  | POCO16      | Alcohol - Positive Consequences                       | I slept better after I drank                                        |  | In the past 30 days, |
| <b>b1303</b> |  |  |  |  |  | POCO17      | Alcohol - Positive Consequences                       | I could relax when I drank                                          |  | In the past 30 days, |
| <b>b1303</b> |  |  |  |  |  | POCO18      | Alcohol - Positive Consequences                       | I fit in better when I drank                                        |  | In the past 30 days, |
| <b>b1303</b> |  |  |  |  |  | POCO19      | Alcohol - Positive Consequences                       | I had more fun when I drank                                         |  | In the past 30 days, |
| <b>b1303</b> |  |  |  |  |  | POCO20      | Alcohol - Positive Consequences                       | I had more desire for sex when I drank                              |  | In the past 30 days, |
| <b>b1303</b> |  |  |  |  |  | POCO21      | Alcohol - Positive Consequences                       | It was easier to talk to people when I drank                        |  | In the past 30 days, |
| <b>b1303</b> |  |  |  |  |  | ALCOHOL SCR | PROMIS Bank v1.0 – Substance Use/Alcohol: Alcohol Use | For the past 30 days, did you drink any type of alcoholic beverage? |  | In the past 30 days, |
| <b>b1303</b> |  |  |  |  |  | CONS01      | PROMIS Bank v1.0 – Substance Use/Alcohol: Alcohol Use | I spent too much time drinking                                      |  | In the past 30 days, |
| <b>b1303</b> |  |  |  |  |  | CONS02      | PROMIS Bank v1.0 – Substance Use/Alcohol: Alcohol Use | I finished several drinks fast to get a quick effect                |  | In the past 30 days, |
| <b>b1303</b> |  |  |  |  |  | CONS07      | PROMIS Bank v1.0 – Substance Use/Alcohol: Alcohol Use | I drank heavily at a single sitting                                 |  | In the past 30 days, |

|              |  |  |  |  |  |        |                                                                |                                                                     |  |                      |
|--------------|--|--|--|--|--|--------|----------------------------------------------------------------|---------------------------------------------------------------------|--|----------------------|
| <b>b1303</b> |  |  |  |  |  | CONS08 | PROMIS Bank<br>v1.0 – Substance<br>Use/Alcohol:<br>Alcohol Use | I drank too much                                                    |  | In the past 30 days, |
| <b>b1303</b> |  |  |  |  |  | CONS09 | PROMIS Bank<br>v1.0 – Substance<br>Use/Alcohol:<br>Alcohol Use | I drank throughout the day                                          |  | In the past 30 days, |
| <b>b1303</b> |  |  |  |  |  | CONS12 | PROMIS Bank<br>v1.0 – Substance<br>Use/Alcohol:<br>Alcohol Use | I used alcohol and other drugs<br>together, to get high             |  | In the past 30 days, |
| <b>b1303</b> |  |  |  |  |  | CRAC02 | PROMIS Bank<br>v1.0 – Substance<br>Use/Alcohol:<br>Alcohol Use | I drank more than planned                                           |  | In the past 30 days, |
| <b>b1303</b> |  |  |  |  |  | CRAC05 | PROMIS Bank<br>v1.0 – Substance<br>Use/Alcohol:<br>Alcohol Use | I had an urge to continue drinking<br>once I started                |  | In the past 30 days, |
| <b>b1303</b> |  |  |  |  |  | CRAC06 | PROMIS Bank<br>v1.0 – Substance<br>Use/Alcohol:<br>Alcohol Use | I felt that I should cut down on my<br>drinking                     |  | In the past 30 days, |
| <b>b1303</b> |  |  |  |  |  | CRAC07 | PROMIS Bank<br>v1.0 – Substance<br>Use/Alcohol:<br>Alcohol Use | I had trouble controlling my drinking                               |  | In the past 30 days, |
| <b>b1303</b> |  |  |  |  |  | CRAC08 | PROMIS Bank<br>v1.0 – Substance<br>Use/Alcohol:<br>Alcohol Use | It was difficult for me to stop drinking<br>after one or two drinks |  | In the past 30 days, |
| <b>b1303</b> |  |  |  |  |  | CRAC09 | PROMIS Bank<br>v1.0 – Substance<br>Use/Alcohol:<br>Alcohol Use | I had urges to drink                                                |  | In the past 30 days, |

|              |  |  |  |  |  |        |                                                                |                                                                   |  |                      |
|--------------|--|--|--|--|--|--------|----------------------------------------------------------------|-------------------------------------------------------------------|--|----------------------|
| <b>b1303</b> |  |  |  |  |  | CRAC10 | PROMIS Bank<br>v1.0 – Substance<br>Use/Alcohol:<br>Alcohol Use | I had cravings for alcohol                                        |  | In the past 30 days, |
| <b>b1303</b> |  |  |  |  |  | CRAC11 | PROMIS Bank<br>v1.0 – Substance<br>Use/Alcohol:<br>Alcohol Use | I felt I needed help for my drinking                              |  | In the past 30 days, |
| <b>b1303</b> |  |  |  |  |  | CRAC12 | PROMIS Bank<br>v1.0 – Substance<br>Use/Alcohol:<br>Alcohol Use | I had trouble stopping drinking when I<br>wanted to               |  | In the past 30 days, |
| <b>b1303</b> |  |  |  |  |  | CRAC13 | PROMIS Bank<br>v1.0 – Substance<br>Use/Alcohol:<br>Alcohol Use | It was difficult to get the thought of<br>drinking out of my mind |  | In the past 30 days, |
| <b>b1303</b> |  |  |  |  |  | TRIG02 | PROMIS Bank<br>v1.0 – Substance<br>Use/Alcohol:<br>Alcohol Use | I drank when I was alone                                          |  | In the past 30 days, |
| <b>b1303</b> |  |  |  |  |  | TRIG03 | PROMIS Bank<br>v1.0 – Substance<br>Use/Alcohol:<br>Alcohol Use | I drank because I had nothing to do                               |  | In the past 30 days, |
| <b>b1303</b> |  |  |  |  |  | TRIG06 | PROMIS Bank<br>v1.0 – Substance<br>Use/Alcohol:<br>Alcohol Use | I drank when I arrived at home                                    |  | In the past 30 days, |
| <b>b1303</b> |  |  |  |  |  | TRIG09 | PROMIS Bank<br>v1.0 – Substance<br>Use/Alcohol:<br>Alcohol Use | I drank because I was angry with<br>myself                        |  | In the past 30 days, |
| <b>b1303</b> |  |  |  |  |  | TRIG10 | PROMIS Bank<br>v1.0 – Substance<br>Use/Alcohol:<br>Alcohol Use | I drank because someone made me<br>angry                          |  | In the past 30 days, |

|              |  |  |  |  |  |        |                                                                |                                  |  |                      |
|--------------|--|--|--|--|--|--------|----------------------------------------------------------------|----------------------------------|--|----------------------|
| <b>b1303</b> |  |  |  |  |  | TRIG11 | PROMIS Bank<br>v1.0 – Substance<br>Use/Alcohol:<br>Alcohol Use | I drank because I was irritable  |  | In the past 30 days, |
| <b>b1303</b> |  |  |  |  |  | TRIG14 | PROMIS Bank<br>v1.0 – Substance<br>Use/Alcohol:<br>Alcohol Use | I drank because I deserved it    |  | In the past 30 days, |
| <b>b1303</b> |  |  |  |  |  | TRIG15 | PROMIS Bank<br>v1.0 – Substance<br>Use/Alcohol:<br>Alcohol Use | I drank because I was annoyed    |  | In the past 30 days, |
| <b>b1303</b> |  |  |  |  |  | TRIG16 | PROMIS Bank<br>v1.0 – Substance<br>Use/Alcohol:<br>Alcohol Use | I drank because I felt tense     |  | In the past 30 days, |
| <b>b1303</b> |  |  |  |  |  | TRIG17 | PROMIS Bank<br>v1.0 – Substance<br>Use/Alcohol:<br>Alcohol Use | I drank at the end of a busy day |  | In the past 30 days, |
| <b>b1303</b> |  |  |  |  |  | TRIG19 | PROMIS Bank<br>v1.0 – Substance<br>Use/Alcohol:<br>Alcohol Use | I drank because I was nervous    |  | In the past 30 days, |
| <b>b1303</b> |  |  |  |  |  | TRIG20 | PROMIS Bank<br>v1.0 – Substance<br>Use/Alcohol:<br>Alcohol Use | I drank because I was sad        |  | In the past 30 days, |
| <b>b1303</b> |  |  |  |  |  | TRIG21 | PROMIS Bank<br>v1.0 – Substance<br>Use/Alcohol:<br>Alcohol Use | I drank because I was lonely     |  | In the past 30 days, |
| <b>b1303</b> |  |  |  |  |  | CONS13 | PROMIS Bank<br>v1.0 – Substance<br>Use/Alcohol:<br>Alcohol Use | In a typical week I drank        |  | In the past 30 days, |

|              |  |  |  |  |  |        |                                                                |                                                                |  |                      |
|--------------|--|--|--|--|--|--------|----------------------------------------------------------------|----------------------------------------------------------------|--|----------------------|
| <b>b1303</b> |  |  |  |  |  | TRIG22 | PROMIS Bank<br>v1.0 – Substance<br>Use/Alcohol:<br>Alcohol Use | I drank because I was depressed                                |  | In the past 30 days, |
| <b>b1303</b> |  |  |  |  |  | TRIG23 | PROMIS Bank<br>v1.0 – Substance<br>Use/Alcohol:<br>Alcohol Use | I drank because I had physical pain                            |  | In the past 30 days, |
| <b>b1303</b> |  |  |  |  |  | TRIG24 | PROMIS Bank<br>v1.0 – Substance<br>Use/Alcohol:<br>Alcohol Use | I drank because I was bored                                    |  | In the past 30 days, |
| <b>b1303</b> |  |  |  |  |  | CONS05 | PROMIS Bank<br>v1.0 – Substance<br>Use/Alcohol:<br>Alcohol Use | On a typical day when I drank alcohol,<br>I had                |  | In the past 30 days, |
| <b>b1303</b> |  |  |  |  |  | CONS11 | PROMIS Bank<br>v1.0 – Substance<br>Use/Alcohol:<br>Alcohol Use | The largest number of drinks that I<br>had in a single day was |  | In the past 30 days, |
| <b>b1303</b> |  |  |  |  |  | CONS03 | PROMIS Bank<br>v1.0 – Substance<br>Use/Alcohol:<br>Alcohol Use | I became drunk or intoxicated                                  |  | In the past 30 days, |
| <b>b1303</b> |  |  |  |  |  | CONS06 | PROMIS Bank<br>v1.0 – Substance<br>Use/Alcohol:<br>Alcohol Use | I spent a whole weekend drinking                               |  | In the past 30 days, |
| <b>b1303</b> |  |  |  |  |  | NECO01 | Alcohol Use -<br>Negative<br>Consequences                      | I worried when I drank                                         |  | In the past 30 days, |
| <b>b1303</b> |  |  |  |  |  | NECO02 | Alcohol Use -<br>Negative<br>Consequences                      | I felt angry when I drank                                      |  | In the past 30 days, |
| <b>b1303</b> |  |  |  |  |  | NECO03 | Alcohol Use -<br>Negative<br>Consequences                      | I felt nervous when I drank                                    |  | In the past 30 days, |



|              |  |  |  |  |  |        |                                     |                                                  |  |                      |
|--------------|--|--|--|--|--|--------|-------------------------------------|--------------------------------------------------|--|----------------------|
| <b>b1303</b> |  |  |  |  |  | NECO04 | Alcohol Use - Negative Consequences | My problems seemed worse when I drank            |  | In the past 30 days, |
| <b>b1303</b> |  |  |  |  |  | NECO05 | Alcohol Use - Negative Consequences | I had trouble keeping appointments after I drank |  | In the past 30 days, |
| <b>b1303</b> |  |  |  |  |  | NECO06 | Alcohol Use - Negative Consequences | I got confused when I drank                      |  | In the past 30 days, |
| <b>b1303</b> |  |  |  |  |  | NECO07 | Alcohol Use - Negative Consequences | I took risks when I drank                        |  | In the past 30 days, |
| <b>b1303</b> |  |  |  |  |  | NECO08 | Alcohol Use - Negative Consequences | I was critical of myself when I drank            |  | In the past 30 days, |
| <b>b1303</b> |  |  |  |  |  | NECO09 | Alcohol Use - Negative Consequences | I felt guilty when I drank                       |  | In the past 30 days, |
| <b>b1303</b> |  |  |  |  |  | NECO10 | Alcohol Use - Negative Consequences | I had a headache after I drank                   |  | In the past 30 days, |
| <b>b1303</b> |  |  |  |  |  | NECO11 | Alcohol Use - Negative Consequences | I got sick when I drank                          |  | In the past 30 days, |
| <b>b1303</b> |  |  |  |  |  | NECO12 | Alcohol Use - Negative Consequences | I felt anxious when I drank                      |  | In the past 30 days, |
| <b>b1303</b> |  |  |  |  |  | NECO13 | Alcohol Use - Negative Consequences | I was clumsy when I drank                        |  | In the past 30 days, |
| <b>b1303</b> |  |  |  |  |  | NECO14 | Alcohol Use - Negative Consequences | I was unreliable after I drank                   |  | In the past 30 days, |
| <b>b1303</b> |  |  |  |  |  | NECO15 | Alcohol Use - Negative Consequences | Others complained about my drinking              |  | In the past 30 days, |
| <b>b1303</b> |  |  |  |  |  | NECO16 | Alcohol Use - Negative Consequences | I was criticized about my drinking               |  | In the past 30 days, |
| <b>b1303</b> |  |  |  |  |  | NECO17 | Alcohol Use - Negative Consequences | I got in an argument when I drank                |  | In the past 30 days, |
| <b>b1303</b> |  |  |  |  |  | NECO18 | Alcohol Use - Negative Consequences | I was loud when I drank                          |  | In the past 30 days, |

|              |  |  |  |  |  |        |                                     |                                                  |  |                      |
|--------------|--|--|--|--|--|--------|-------------------------------------|--------------------------------------------------|--|----------------------|
| <b>b1303</b> |  |  |  |  |  | NECO19 | Alcohol Use - Negative Consequences | I felt sad when I drank                          |  | In the past 30 days, |
| <b>b1303</b> |  |  |  |  |  | NECO20 | Alcohol Use - Negative Consequences | Drinking created problems between me and others  |  | In the past 30 days, |
| <b>b1303</b> |  |  |  |  |  | NECO21 | Alcohol Use - Negative Consequences | I said or did embarrassing things when I drank   |  | In the past 30 days, |
| <b>b1303</b> |  |  |  |  |  | NECO22 | Alcohol Use - Negative Consequences | I lied about my drinking                         |  | In the past 30 days, |
| <b>b1303</b> |  |  |  |  |  | NECO23 | Alcohol Use - Negative Consequences | I disappointed others when I drank               |  | In the past 30 days, |
| <b>b1303</b> |  |  |  |  |  | NECO24 | Alcohol Use - Negative Consequences | Others had trouble counting on me when I drank   |  | In the past 30 days, |
| <b>b1303</b> |  |  |  |  |  | NECO25 | Alcohol Use - Negative Consequences | I looked sloppy when I drank                     |  | In the past 30 days, |
| <b>b1303</b> |  |  |  |  |  | NECO26 | Alcohol Use - Negative Consequences | I felt dizzy after I drank                       |  | In the past 30 days, |
| <b>b1303</b> |  |  |  |  |  | NECO27 | Alcohol Use - Negative Consequences | I had a hangover after I drank                   |  | In the past 30 days, |
| <b>b1303</b> |  |  |  |  |  | NECO28 | Alcohol Use - Negative Consequences | I used poor judgment when I drank                |  | In the past 30 days, |
| <b>b1303</b> |  |  |  |  |  | NECO29 | Alcohol Use - Negative Consequences | I had trouble getting things done after I drank  |  | In the past 30 days, |
| <b>b1303</b> |  |  |  |  |  | NECO30 | Alcohol Use - Negative Consequences | I was inconsiderate when I drank                 |  | In the past 30 days, |
| <b>b1303</b> |  |  |  |  |  | NECO31 | Alcohol Use - Negative Consequences | I had trouble trusting other people when I drank |  | In the past 30 days, |
| <b>b1303</b> |  |  |  |  |  | NEXP01 | Alcohol Use - Negative Expectencies | People have trouble thinking when they drink     |  | In the past 30 days, |
| <b>b1303</b> |  |  |  |  |  | NEXP02 | Alcohol Use - Negative Expectencies | People feel sick the day after drinking          |  | In the past 30 days, |

|              |  |  |  |  |  |        |                                     |                                                          |  |                      |
|--------------|--|--|--|--|--|--------|-------------------------------------|----------------------------------------------------------|--|----------------------|
| <b>b1303</b> |  |  |  |  |  | NEXP03 | Alcohol Use - Negative Expectencies | People do things they regret while drinking              |  | In the past 30 days, |
| <b>b1303</b> |  |  |  |  |  | NEXP04 | Alcohol Use - Negative Expectencies | People make bad decisions when they drink                |  | In the past 30 days, |
| <b>b1303</b> |  |  |  |  |  | NEXP05 | Alcohol Use - Negative Expectencies | Drinking is harmful to mental health                     |  | In the past 30 days, |
| <b>b1303</b> |  |  |  |  |  | NEXP06 | Alcohol Use - Negative Expectencies | People are careless when they drink                      |  | In the past 30 days, |
| <b>b1303</b> |  |  |  |  |  | NEXP07 | Alcohol Use - Negative Expectencies | People are irresponsible when they drink                 |  | In the past 30 days, |
| <b>b1303</b> |  |  |  |  |  | NEXP08 | Alcohol Use - Negative Expectencies | People are pushy when they drink                         |  | In the past 30 days, |
| <b>b1303</b> |  |  |  |  |  | NEXP09 | Alcohol Use - Negative Expectencies | People are rude when they drink                          |  | In the past 30 days, |
| <b>b1303</b> |  |  |  |  |  | NEXP10 | Alcohol Use - Negative Expectencies | Drinking can be harmful to physical health               |  | In the past 30 days, |
| <b>b1303</b> |  |  |  |  |  | NEXP14 | Alcohol Use - Negative Expectencies | People are selfish when they drink                       |  | In the past 30 days, |
| <b>b1303</b> |  |  |  |  |  | PEXP02 | Alcohol Use - Positive Expectencies | People are outgoing when they drink                      |  | In the past 30 days, |
| <b>b1303</b> |  |  |  |  |  | PEXP04 | Alcohol Use - Positive Expectencies | People have more desire for sex when they drink          |  | In the past 30 days, |
| <b>b1303</b> |  |  |  |  |  | PEXP05 | Alcohol Use - Positive Expectencies | People sleep better when they drink                      |  | In the past 30 days, |
| <b>b1303</b> |  |  |  |  |  | PEXP06 | Alcohol Use - Positive Expectencies | People have more fun at social occasions when they drink |  | In the past 30 days, |
| <b>b1303</b> |  |  |  |  |  | PEXP07 | Alcohol Use - Positive Expectencies | Alcohol makes it easier to talk to people                |  | In the past 30 days, |
| <b>b1303</b> |  |  |  |  |  | PEXP09 | Alcohol Use - Positive Expectencies | Drinking eases physical pain                             |  | In the past 30 days, |

|              |  |  |  |  |  |          |                                      |                                                     |                                                 |                      |
|--------------|--|--|--|--|--|----------|--------------------------------------|-----------------------------------------------------|-------------------------------------------------|----------------------|
| <b>b1303</b> |  |  |  |  |  | PEXP11   | Alcohol Use - Positive Expectencies  | People forget their problems when they drink        |                                                 | In the past 30 days, |
| <b>b1303</b> |  |  |  |  |  | PEXP12   | Alcohol Use - Positive Expectencies  | Drinking improves a person's mood                   |                                                 | In the past 30 days, |
| <b>b1303</b> |  |  |  |  |  | PEXP13   | Alcohol Use - Positive Expectencies  | People feel happy when they drink                   |                                                 | In the past 30 days, |
| <b>b134</b>  |  |  |  |  |  | EDANX49  | PROMIS Bank v1.0 - Anxiety           | I had difficulty sleeping                           | Never<br>Rarely<br>Sometimes<br>Often<br>Always | In the past 7 days   |
| <b>b134</b>  |  |  |  |  |  | Sleep110 | PROMIS Bank v1.0 - Sleep Disturbance | I got enough sleep.                                 | Never<br>Rarely<br>Sometimes<br>Often<br>Always | In the past 7 days   |
| <b>b134</b>  |  |  |  |  |  | Sleep42  | PROMIS Bank v1.0 - Sleep Disturbance | It was easy for me to fall asleep.                  | Never<br>Rarely<br>Sometimes<br>Often<br>Always | In the past 7 days   |
| <b>b134</b>  |  |  |  |  |  | Sleep45  | PROMIS Bank v1.0 - Sleep Disturbance | I laid in bed for hours waiting to fall asleep.     | Never<br>Rarely<br>Sometimes<br>Often<br>Always | In the past 7 days   |
| <b>b134</b>  |  |  |  |  |  | Sleep50  | PROMIS Bank v1.0 - Sleep Disturbance | I woke up too early and could not fall back asleep. | Never<br>Rarely<br>Sometimes<br>Often<br>Always | In the past 7 days   |
| <b>b134</b>  |  |  |  |  |  | Sleep87  | PROMIS Bank v1.0 - Sleep Disturbance | I had trouble staying asleep.                       | Never<br>Rarely<br>Sometimes<br>Often<br>Always | In the past 7 days   |
| <b>b134</b>  |  |  |  |  |  | Sleep90  | PROMIS Bank v1.0 - Sleep Disturbance | I had trouble sleeping.                             | Never<br>Rarely<br>Sometimes<br>Often<br>Always | In the past 7 days   |

|             |      |  |  |  |  |          |                                      |                                                             |                                                                    |                    |
|-------------|------|--|--|--|--|----------|--------------------------------------|-------------------------------------------------------------|--------------------------------------------------------------------|--------------------|
| <b>b134</b> |      |  |  |  |  | Sleep92  | PROMIS Bank v1.0 - Sleep Disturbance | I woke up and had trouble falling back to sleep.            | Never<br>Rarely<br>Sometimes<br>Often<br>Always                    | In the past 7 days |
| <b>b134</b> | b126 |  |  |  |  | Sleep125 | PROMIS Bank v1.0 - Sleep Disturbance | I felt lousy when I woke up.                                | Not at all<br>A little bit<br>Somewhat<br>Quite a bit<br>Very much | In the past 7 days |
| <b>b134</b> | b126 |  |  |  |  | Sleep65  | PROMIS Bank v1.0 - Sleep Disturbance | I felt physically tense at bedtime.                         | Not at all<br>A little bit<br>Somewhat<br>Quite a bit<br>Very much | In the past 7 days |
| <b>b134</b> | b126 |  |  |  |  | Sleep68  | PROMIS Bank v1.0 - Sleep Disturbance | I felt worried at bedtime.                                  | Not at all<br>A little bit<br>Somewhat<br>Quite a bit<br>Very much | In the past 7 days |
| <b>b134</b> | b126 |  |  |  |  | Sleep70  | PROMIS Bank v1.0 - Sleep Disturbance | I felt sad at bedtime.                                      | Not at all<br>A little bit<br>Somewhat<br>Quite a bit<br>Very much | In the past 7 days |
| <b>b134</b> | b126 |  |  |  |  | Sleep78  | PROMIS Bank v1.0 - Sleep Disturbance | Stress disturbed my sleep.                                  | Not at all<br>A little bit<br>Somewhat<br>Quite a bit<br>Very much | In the past 7 days |
| <b>b134</b> | d570 |  |  |  |  | Sleep71  | PROMIS Bank v1.0 - Sleep Disturbance | I had trouble getting into a comfortable position to sleep. | Not at all<br>A little bit<br>Somewhat<br>Quite a bit<br>Very much | In the past 7 days |
| <b>b134</b> |      |  |  |  |  | Sleep105 | PROMIS Bank v1.0 - Sleep Disturbance | My sleep was restful.                                       | Not at all<br>A little bit<br>Somewhat<br>Quite a bit<br>Very much | In the past 7 days |
| <b>b134</b> |      |  |  |  |  | Sleep107 | PROMIS Bank v1.0 - Sleep Disturbance | My sleep was deep.                                          | Not at all<br>A little bit<br>Somewhat<br>Quite a bit<br>Very much | In the past 7 days |

|             |  |  |  |  |  |          |                                      |                                                |                                                                    |                    |
|-------------|--|--|--|--|--|----------|--------------------------------------|------------------------------------------------|--------------------------------------------------------------------|--------------------|
| <b>b134</b> |  |  |  |  |  | Sleep115 | PROMIS Bank v1.0 - Sleep Disturbance | I was satisfied with my sleep.                 | Not at all<br>A little bit<br>Somewhat<br>Quite a bit<br>Very much | In the past 7 days |
| <b>b134</b> |  |  |  |  |  | Sleep116 | PROMIS Bank v1.0 - Sleep Disturbance | My sleep was refreshing.                       | Not at all<br>A little bit<br>Somewhat<br>Quite a bit<br>Very much | In the past 7 days |
| <b>b134</b> |  |  |  |  |  | Sleep106 | PROMIS Bank v1.0 - Sleep Disturbance | My sleep was light.                            | Not at all<br>A little bit<br>Somewhat<br>Quite a bit<br>Very much | In the past 7 days |
| <b>b134</b> |  |  |  |  |  | Sleep108 | PROMIS Bank v1.0 - Sleep Disturbance | My sleep was restless.                         | Not at all<br>A little bit<br>Somewhat<br>Quite a bit<br>Very much | In the past 7 days |
| <b>b134</b> |  |  |  |  |  | Sleep20  | PROMIS Bank v1.0 - Sleep Disturbance | I had a problem with my sleep.                 | Not at all<br>A little bit<br>Somewhat<br>Quite a bit<br>Very much | In the past 7 days |
| <b>b134</b> |  |  |  |  |  | Sleep44  | PROMIS Bank v1.0 - Sleep Disturbance | I had difficulty falling asleep.               | Not at all<br>A little bit<br>Somewhat<br>Quite a bit<br>Very much | In the past 7 days |
| <b>b134</b> |  |  |  |  |  | Sleep67  | PROMIS Bank v1.0 - Sleep Disturbance | I worried about not being able to fall asleep. | Not at all<br>A little bit<br>Somewhat<br>Quite a bit<br>Very much | In the past 7 days |
| <b>b134</b> |  |  |  |  |  | Sleep69  | PROMIS Bank v1.0 - Sleep Disturbance | I had trouble stopping my thoughts at bedtime. | Not at all<br>A little bit<br>Somewhat<br>Quite a bit<br>Very much | In the past 7 days |
| <b>b134</b> |  |  |  |  |  | Sleep72  | PROMIS Bank v1.0 - Sleep Disturbance | I tried hard to get to sleep.                  | Not at all<br>A little bit<br>Somewhat<br>Quite a bit<br>Very much | In the past 7 days |

|             |      |  |  |  |  |          |                                             |                                                                                               |                                                                                                                                    |                    |
|-------------|------|--|--|--|--|----------|---------------------------------------------|-----------------------------------------------------------------------------------------------|------------------------------------------------------------------------------------------------------------------------------------|--------------------|
| <b>b134</b> |      |  |  |  |  | Sleep86  | PROMIS Bank v1.0 - Sleep Disturbance        | I tossed and turned at night.                                                                 | Not at all<br>A little bit<br>Somewhat<br>Quite a bit<br>Very much                                                                 | In the past 7 days |
| <b>b134</b> |      |  |  |  |  | Sleep93  | PROMIS Bank v1.0 - Sleep Disturbance        | I was afraid I would not get back to sleep after waking up.                                   | Not at all<br>A little bit<br>Somewhat<br>Quite a bit<br>Very much                                                                 | In the past 7 days |
| <b>b134</b> |      |  |  |  |  | Sleep123 | PROMIS Bank v1.0 - Sleep-Related Impairment | I had difficulty waking up.                                                                   | Not at all<br>A little bit<br>Somewhat<br>Quite a bit<br>Very much                                                                 | In the past 7 days |
| <b>b134</b> |      |  |  |  |  | Sleep109 | PROMIS Bank v1.0 - Sleep Disturbance        | My sleep quality was...                                                                       | Very poor<br>Poor<br>Fair<br>Good<br>Very good                                                                                     | In the past 7 days |
| <b>b140</b> |      |  |  |  |  | PC8      | PROMIS Applied Cog Gen Concerns             | I have had trouble concentrating                                                              | 1=Never<br>2=Rarely (Once)<br>3=Sometimes (Two or three times)<br>4=Often (About once a day)<br>5=Very often (Several times a day) | In the past 7 days |
| <b>b140</b> |      |  |  |  |  | PC25     | PROMIS Applied Cog Gen Concerns             | I have had to work really hard to pay attention or I would make a mistake                     | 1=Never<br>2=Rarely (Once)<br>3=Sometimes (Two or three times)<br>4=Often (About once a day)<br>5=Very often (Several times a day) | In the past 7 days |
| <b>b140</b> | d220 |  |  |  |  | PC42     | PROMIS Applied Cog Gen Concerns             | I have had trouble shifting back and forth between different activities that require thinking | 1=Never<br>2=Rarely (Once)<br>3=Sometimes (Two or three times)<br>4=Often (About once a day)<br>5=Very often (Several times a day) | In the past 7 days |

|             |      |          |  |  |  |      |                                 |                                                                                                                        |                                                                                                                                    |                    |
|-------------|------|----------|--|--|--|------|---------------------------------|------------------------------------------------------------------------------------------------------------------------|------------------------------------------------------------------------------------------------------------------------------------|--------------------|
| <b>b140</b> |      |          |  |  |  | PC41 | PROMIS Applied Cog Gen Concerns | I have had trouble keeping track of what I was doing when interrupted                                                  | 1=Never<br>2=Rarely (Once)<br>3=Sometimes (Two or three times)<br>4=Often (About once a day)<br>5=Very often (Several times a day) | In the past 7 days |
| <b>b140</b> | b144 | 840-d859 |  |  |  | PC50 | PROMIS App Cog Abilities        | My problems with memory, concentration, or making mental mistakes have interfered with my ability to work              | 1=Never<br>2=Rarely (Once)<br>3=Sometimes (Two or three times)<br>4=Often (About once a day)<br>5=Very often (Several times a day) | In the past 7 days |
| <b>b140</b> | b144 | d920     |  |  |  | PC51 | PROMIS Applied Cog Gen Concerns | My problems with memory, concentration, or making mental mistakes have interfered with my ability to do things I enjoy | 1=Never<br>2=Rarely (Once)<br>3=Sometimes (Two or three times)<br>4=Often (About once a day)<br>5=Very often (Several times a day) | In the past 7 days |
| <b>b140</b> | b144 |          |  |  |  | PC48 | PROMIS Applied Cog Gen Concerns | I have hidden my problems with memory, concentration, or making mental mistakes so that others would not notice        | 1=Never<br>2=Rarely (Once)<br>3=Sometimes (Two or three times)<br>4=Often (About once a day)<br>5=Very often (Several times a day) | In the past 7 days |
| <b>b140</b> | b144 |          |  |  |  | PC49 | PROMIS Applied Cog Gen Concerns | I have been upset about my problems with memory, concentration, or making mental mistakes                              | 1=Never<br>2=Rarely (Once)<br>3=Sometimes (Two or three times)<br>4=Often (About once a day)<br>5=Very often (Several times a day) | In the past 7 days |
| <b>b140</b> | b144 |          |  |  |  | PC53 | PROMIS Applied Cog Gen Concerns | My problems with memory, concentration, or making mental mistakes have interfered with the quality of my life          | 1=Never<br>2=Rarely (Once)<br>3=Sometimes (Two or three times)<br>4=Often (About once a day)<br>5=Very often (Several times a day) | In the past 7 days |



|             |      |  |  |  |  |           |                                 |                                                                                          |                                                                              |                    |
|-------------|------|--|--|--|--|-----------|---------------------------------|------------------------------------------------------------------------------------------|------------------------------------------------------------------------------|--------------------|
| <b>b140</b> |      |  |  |  |  | PC6       | PROMIS Applied Cog Gen Concerns | I have been able to concentrate                                                          | 1=Not at all<br>2=A little bit<br>3=Somewhat<br>4=Quite a bit<br>5=Very much | In the past 7 days |
| <b>b140</b> |      |  |  |  |  | PC29_2    | PROMIS Applied Cog Gen Concerns | I have been able to pay attention and keep track of what I am doing without extra effort | 1=Not at all<br>2=A little bit<br>3=Somewhat<br>4=Quite a bit<br>5=Very much | In the past 7 days |
| <b>b140</b> | d220 |  |  |  |  | PC46_2    | PROMIS Applied Cog Gen Concerns | I have been able to shift back and forth between two activities that require thinking    | 1=Not at all<br>2=A little bit<br>3=Somewhat<br>4=Quite a bit<br>5=Very much | In the past 7 days |
| <b>b140</b> |      |  |  |  |  | PC47_2    | PROMIS App Cog Abilities        | I have been able to keep track of what I am doing, even if I am interrupted              | 1=Not at all<br>2=A little bit<br>3=Somewhat<br>4=Quite a bit<br>5=Very much | In the past 7 days |
| <b>b140</b> | d220 |  |  |  |  | PC-CaPS22 | PROMIS App Cog Abilities        | I have been able to handle many tasks at once without losing track of what I was doing   | 1=Not at all<br>2=A little bit<br>3=Somewhat<br>4=Quite a bit<br>5=Very much | In the past 7 days |
| <b>b140</b> |      |  |  |  |  | PC-CaPS4  | PROMIS App Cog Abilities        | My ability to concentrate has been good                                                  | 1=Not at all<br>2=A little bit<br>3=Somewhat<br>4=Quite a bit<br>5=Very much | In the past 7 days |
| <b>b140</b> |      |  |  |  |  | PC-CaPS5  | PROMIS App Cog Abilities        | I have been able to focus my attention                                                   | 1=Not at all<br>2=A little bit<br>3=Somewhat<br>4=Quite a bit<br>5=Very much | In the past 7 days |
| <b>b140</b> |      |  |  |  |  | PC-CaPS6  | PROMIS App Cog Abilities        | I have been able to mentally focus                                                       | 1=Not at all<br>2=A little bit<br>3=Somewhat<br>4=Quite a bit<br>5=Very much | In the past 7 days |
| <b>b140</b> |      |  |  |  |  | EDANX21   | PROMIS App Cog Abilities        | I had trouble paying attention                                                           | Never<br>Rarely<br>Sometimes<br>Often<br>Always                              | In the past 7 days |

|             |      |  |  |  |  |      |                                 |                                                                                    |                                                                                                                                    |                    |
|-------------|------|--|--|--|--|------|---------------------------------|------------------------------------------------------------------------------------|------------------------------------------------------------------------------------------------------------------------------------|--------------------|
| <b>b144</b> |      |  |  |  |  | PC36 | PROMIS App Cog Abilities        | I have had to work harder than usual to keep track of what I was doing             | 1=Never<br>2=Rarely (Once)<br>3=Sometimes (Two or three times)<br>4=Often (About once a day)<br>5=Very often (Several times a day) | In the past 7 days |
| <b>b144</b> |      |  |  |  |  | PC40 | PROMIS Applied Cog Gen Concerns | I have had to use written lists more often than usual so I would not forget things | 1=Never<br>2=Rarely (Once)<br>3=Sometimes (Two or three times)<br>4=Often (About once a day)<br>5=Very often (Several times a day) | In the past 7 days |
| <b>b144</b> | d170 |  |  |  |  | PC7  | PROMIS App Cog Abilities        | I have made mistakes when writing down phone numbers                               | 1=Never<br>2=Rarely (Once)<br>3=Sometimes (Two or three times)<br>4=Often (About once a day)<br>5=Very often (Several times a day) | In the past 7 days |
| <b>b144</b> |      |  |  |  |  | PC21 | PROMIS Applied Cog Gen Concerns | I have walked into a room and forgotten what I meant to get or do there            | 1=Never<br>2=Rarely (Once)<br>3=Sometimes (Two or three times)<br>4=Often (About once a day)<br>5=Very often (Several times a day) | In the past 7 days |
| <b>b144</b> |      |  |  |  |  | PC22 | PROMIS Applied Cog Gen Concerns | I have needed medical instructions repeated because I could not keep them straight | 1=Never<br>2=Rarely (Once)<br>3=Sometimes (Two or three times)<br>4=Often (About once a day)<br>5=Very often (Several times a day) | In the past 7 days |
| <b>b144</b> |      |  |  |  |  | PC26 | PROMIS Applied Cog Gen Concerns | I have forgotten names of people soon after being introduced                       | 1=Never<br>2=Rarely (Once)<br>3=Sometimes (Two or three times)<br>4=Often (About once a day)<br>5=Very often (Several times a day) | In the past 7 days |

|             |      |  |  |  |  |      |                                       |                                                                                                                               |                                                                                                                                    |                    |
|-------------|------|--|--|--|--|------|---------------------------------------|-------------------------------------------------------------------------------------------------------------------------------|------------------------------------------------------------------------------------------------------------------------------------|--------------------|
| <b>b144</b> |      |  |  |  |  | PC10 | PROMIS Applied<br>Cog Gen<br>Concerns | I have had trouble finding my way to a familiar place                                                                         | 1=Never<br>2=Rarely (Once)<br>3=Sometimes (Two or three times)<br>4=Often (About once a day)<br>5=Very often (Several times a day) | In the past 7 days |
| <b>b144</b> |      |  |  |  |  | PC11 | PROMIS Applied<br>Cog Gen<br>Concerns | I have had trouble remembering where I put things, like my keys or my wallet                                                  | 1=Never<br>2=Rarely (Once)<br>3=Sometimes (Two or three times)<br>4=Often (About once a day)<br>5=Very often (Several times a day) | In the past 7 days |
| <b>b144</b> |      |  |  |  |  | PC12 | PROMIS Applied<br>Cog Gen<br>Concerns | I have had trouble remembering whether I did things I was supposed to do, like taking a medicine or buying something I needed | 1=Never<br>2=Rarely (Once)<br>3=Sometimes (Two or three times)<br>4=Often (About once a day)<br>5=Very often (Several times a day) | In the past 7 days |
| <b>b144</b> |      |  |  |  |  | PC13 | PROMIS Applied<br>Cog Gen<br>Concerns | I have had trouble remembering new information, like phone numbers or simple instructions                                     | 1=Never<br>2=Rarely (Once)<br>3=Sometimes (Two or three times)<br>4=Often (About once a day)<br>5=Very often (Several times a day) | In the past 7 days |
| <b>b144</b> | e4   |  |  |  |  | PC30 | PROMIS App Cog<br>Abilities           | Other people have told me I seemed to have trouble <u>remembering information</u>                                             | 1=Never<br>2=Rarely (Once)<br>3=Sometimes (Two or three times)<br>4=Often (About once a day)<br>5=Very often (Several times a day) | In the past 7 days |
| <b>b144</b> | b167 |  |  |  |  | PC14 | PROMIS App Cog<br>Abilities           | I have had trouble recalling the name of an object while talking to someone                                                   | 1=Never<br>2=Rarely (Once)<br>3=Sometimes (Two or three times)<br>4=Often (About once a day)<br>5=Very often (Several times a day) | In the past 7 days |

|             |      |  |  |  |  |           |                                 |                                                                                         |                                                                              |                    |
|-------------|------|--|--|--|--|-----------|---------------------------------|-----------------------------------------------------------------------------------------|------------------------------------------------------------------------------|--------------------|
| <b>b144</b> |      |  |  |  |  | PC44_2    | PROMIS Applied Cog Gen Concerns | My memory has been as good as usual                                                     | 1=Not at all<br>2=A little bit<br>3=Somewhat<br>4=Quite a bit<br>5=Very much | In the past 7 days |
| <b>b144</b> |      |  |  |  |  | PC-CaPS23 | PROMIS Applied Cog Gen Concerns | My ability to remember things that I need to do has been as good as usual               | 1=Not at all<br>2=A little bit<br>3=Somewhat<br>4=Quite a bit<br>5=Very much | In the past 7 days |
| <b>b144</b> |      |  |  |  |  | PC24      | PROMIS Applied Cog Gen Concerns | I have been able to remember where I put things, like my keys or my wallet              | 1=Not at all<br>2=A little bit<br>3=Somewhat<br>4=Quite a bit<br>5=Very much | In the past 7 days |
| <b>b144</b> |      |  |  |  |  | PC27      | PROMIS Applied Cog Gen Concerns | I have been able to remember to do things, like take medicine or buy something I needed | 1=Not at all<br>2=A little bit<br>3=Somewhat<br>4=Quite a bit<br>5=Very much | In the past 7 days |
| <b>b144</b> | d475 |  |  |  |  | PC-CaPS21 | PROMIS App Cog Abilities        | My ability to follow driving directions has been as good as usual                       | 1=Not at all<br>2=A little bit<br>3=Somewhat<br>4=Quite a bit<br>5=Very much | In the past 7 days |
| <b>b144</b> |      |  |  |  |  | PC-CaPS10 | PROMIS App Cog Abilities        | I have been able to remember telephone numbers                                          | 1=Not at all<br>2=A little bit<br>3=Somewhat<br>4=Quite a bit<br>5=Very much | In the past 7 days |
| <b>b144</b> |      |  |  |  |  | PC-CaPS12 | PROMIS App Cog Abilities        | I have been able to remember the name of a familiar object                              | 1=Not at all<br>2=A little bit<br>3=Somewhat<br>4=Quite a bit<br>5=Very much | In the past 7 days |
| <b>b144</b> |      |  |  |  |  | PC-CaPS14 | PROMIS App Cog Abilities        | I have been able to remember things as easily as usual without extra effort             | 1=Not at all<br>2=A little bit<br>3=Somewhat<br>4=Quite a bit<br>5=Very much | In the past 7 days |
| <b>b144</b> |      |  |  |  |  | PC-CaPS16 | PROMIS App Cog Abilities        | My ability to remember important dates has been as good as usual                        | 1=Not at all<br>2=A little bit<br>3=Somewhat<br>4=Quite a bit<br>5=Very much | In the past 7 days |

|             |      |  |  |  |  |           |                          |                                                                                     |                                                                              |                    |
|-------------|------|--|--|--|--|-----------|--------------------------|-------------------------------------------------------------------------------------|------------------------------------------------------------------------------|--------------------|
| <b>b144</b> |      |  |  |  |  | PC-CaPS17 | PROMIS App Cog Abilities | My ability to remember names has been as good as usual                              | 1=Not at all<br>2=A little bit<br>3=Somewhat<br>4=Quite a bit<br>5=Very much | In the past 7 days |
| <b>b144</b> |      |  |  |  |  | PC-CaPS19 | PROMIS App Cog Abilities | My ability to keep track of lists has been as good as usual                         | 1=Not at all<br>2=A little bit<br>3=Somewhat<br>4=Quite a bit<br>5=Very much | In the past 7 days |
| <b>b144</b> |      |  |  |  |  | PC-CaPS8  | PROMIS App Cog Abilities | I have been able to remember the name of a familiar person                          | 1=Not at all<br>2=A little bit<br>3=Somewhat<br>4=Quite a bit<br>5=Very much | In the past 7 days |
| <b>b144</b> |      |  |  |  |  | PC-CaPS9  | PROMIS App Cog Abilities | I have been able to learn new things easily, like telephone numbers or instructions | 1=Not at all<br>2=A little bit<br>3=Somewhat<br>4=Quite a bit<br>5=Very much | In the past 7 days |
| <b>b152</b> | b130 |  |  |  |  | EDANG11   | PROMIS Bank v1.0 - Anger | I felt like breaking things                                                         | Never<br>Rarely<br>Sometimes<br>Often<br>Always                              | In the past 7 days |
| <b>b152</b> | b130 |  |  |  |  | EDANG15   | PROMIS Bank v1.0 - Anger | I felt like I was ready to explode                                                  | Never<br>Rarely<br>Sometimes<br>Often<br>Always                              | In the past 7 days |
| <b>b152</b> | b130 |  |  |  |  | EDANG42   | PROMIS Bank v1.0 - Anger | I had trouble controlling my temper                                                 | Never<br>Rarely<br>Sometimes<br>Often<br>Always                              | In the past 7 days |
| <b>b152</b> | d250 |  |  |  |  | EDANG01   | PROMIS Bank v1.0 - Anger | When I was frustrated, I let it show                                                | Never<br>Rarely<br>Sometimes<br>Often<br>Always                              | In the past 7 days |
| <b>b152</b> | d710 |  |  |  |  | EDANG26   | PROMIS Bank v1.0 - Anger | I held grudges towards others                                                       | Never<br>Rarely<br>Sometimes<br>Often<br>Always                              | In the past 7 days |

|             |      |  |  |  |  |         |                             |                                                                  |                                                 |                    |
|-------------|------|--|--|--|--|---------|-----------------------------|------------------------------------------------------------------|-------------------------------------------------|--------------------|
| <b>b152</b> | d710 |  |  |  |  | EDANG31 | PROMIS Bank<br>v1.0 - Anger | I was stubborn with others                                       | Never<br>Rarely<br>Sometimes<br>Often<br>Always | In the past 7 days |
| <b>b152</b> |      |  |  |  |  | EDANG03 | PROMIS Bank<br>v1.0 - Anger | I was irritated more than people knew                            | Never<br>Rarely<br>Sometimes<br>Often<br>Always | In the past 7 days |
| <b>b152</b> |      |  |  |  |  | EDANG04 | PROMIS Bank<br>v1.0 - Anger | I felt envious of others                                         | Never<br>Rarely<br>Sometimes<br>Often<br>Always | In the past 7 days |
| <b>b152</b> |      |  |  |  |  | EDANG06 | PROMIS Bank<br>v1.0 - Anger | I made myself angry about something<br>just by thinking about it | Never<br>Rarely<br>Sometimes<br>Often<br>Always | In the past 7 days |
| <b>b152</b> |      |  |  |  |  | EDANG09 | PROMIS Bank<br>v1.0 - Anger | I felt angry                                                     | Never<br>Rarely<br>Sometimes<br>Often<br>Always | In the past 7 days |
| <b>b152</b> |      |  |  |  |  | EDANG16 | PROMIS Bank<br>v1.0 - Anger | When I was angry, I sulked                                       | Never<br>Rarely<br>Sometimes<br>Often<br>Always | In the past 7 days |
| <b>b152</b> |      |  |  |  |  | EDANG17 | PROMIS Bank<br>v1.0 - Anger | I felt resentful when I didn't get my<br>way                     | Never<br>Rarely<br>Sometimes<br>Often<br>Always | In the past 7 days |
| <b>b152</b> |      |  |  |  |  | EDANG18 | PROMIS Bank<br>v1.0 - Anger | I felt guilty about my anger                                     | Never<br>Rarely<br>Sometimes<br>Often<br>Always | In the past 7 days |
| <b>b152</b> |      |  |  |  |  | EDANG21 | PROMIS Bank<br>v1.0 - Anger | I felt bitter about things                                       | Never<br>Rarely<br>Sometimes<br>Often<br>Always | In the past 7 days |

|             |  |  |  |  |  |         |                          |                                                                    |                                                 |                    |
|-------------|--|--|--|--|--|---------|--------------------------|--------------------------------------------------------------------|-------------------------------------------------|--------------------|
| <b>b152</b> |  |  |  |  |  | EDANG22 | PROMIS Bank v1.0 - Anger | I felt that people were trying to anger me                         | Never<br>Rarely<br>Sometimes<br>Often<br>Always | In the past 7 days |
| <b>b152</b> |  |  |  |  |  | EDANG25 | PROMIS Bank v1.0 - Anger | I stayed angry for hours                                           | Never<br>Rarely<br>Sometimes<br>Often<br>Always | In the past 7 days |
| <b>b152</b> |  |  |  |  |  | EDANG28 | PROMIS Bank v1.0 - Anger | I felt angrier than I thought I should                             | Never<br>Rarely<br>Sometimes<br>Often<br>Always | In the past 7 days |
| <b>b152</b> |  |  |  |  |  | EDANG30 | PROMIS Bank v1.0 - Anger | I was grouchy                                                      | Never<br>Rarely<br>Sometimes<br>Often<br>Always | In the past 7 days |
| <b>b152</b> |  |  |  |  |  | EDANG35 | PROMIS Bank v1.0 - Anger | I felt annoyed                                                     | Never<br>Rarely<br>Sometimes<br>Often<br>Always | In the past 7 days |
| <b>b152</b> |  |  |  |  |  | EDANG37 | PROMIS Bank v1.0 - Anger | I had a bad temper                                                 | Never<br>Rarely<br>Sometimes<br>Often<br>Always | In the past 7 days |
| <b>b152</b> |  |  |  |  |  | EDANG45 | PROMIS Bank v1.0 - Anger | I was angry when I was delayed                                     | Never<br>Rarely<br>Sometimes<br>Often<br>Always | In the past 7 days |
| <b>b152</b> |  |  |  |  |  | EDANG47 | PROMIS Bank v1.0 - Anger | Even after I expressed my anger, I had trouble forgetting about it | Never<br>Rarely<br>Sometimes<br>Often<br>Always | In the past 7 days |
| <b>b152</b> |  |  |  |  |  | EDANG48 | PROMIS Bank v1.0 - Anger | I felt like I needed help for my anger                             | Never<br>Rarely<br>Sometimes<br>Often<br>Always | In the past 7 days |

|             |      |  |  |  |  |         |                            |                                                            |                                                 |                    |
|-------------|------|--|--|--|--|---------|----------------------------|------------------------------------------------------------|-------------------------------------------------|--------------------|
| <b>b152</b> |      |  |  |  |  | EDANG54 | PROMIS Bank v1.0 - Anger   | I was angry when something blocked my plans                | Never<br>Rarely<br>Sometimes<br>Often<br>Always | In the past 7 days |
| <b>b152</b> |      |  |  |  |  | EDANG55 | PROMIS Bank v1.0 - Anger   | I felt like yelling at someone                             | Never<br>Rarely<br>Sometimes<br>Often<br>Always | In the past 7 days |
| <b>b152</b> | b140 |  |  |  |  | EDANX40 | PROMIS Bank v1.0 - Anxiety | I found it hard to focus on anything other than my anxiety | Never<br>Rarely<br>Sometimes<br>Often<br>Always | In the past 7 days |
| <b>b152</b> |      |  |  |  |  | EDANX01 | PROMIS Bank v1.0 - Anxiety | I felt fearful                                             | Never<br>Rarely<br>Sometimes<br>Often<br>Always | In the past 7 days |
| <b>b152</b> |      |  |  |  |  | EDANX02 | PROMIS Bank v1.0 - Anxiety | I felt frightened                                          | Never<br>Rarely<br>Sometimes<br>Often<br>Always | In the past 7 days |
| <b>b152</b> |      |  |  |  |  | EDANX03 | PROMIS Bank v1.0 - Anxiety | It scared me when I felt nervous                           | Never<br>Rarely<br>Sometimes<br>Often<br>Always | In the past 7 days |
| <b>b152</b> |      |  |  |  |  | EDANX05 | PROMIS Bank v1.0 - Anxiety | I felt anxious                                             | Never<br>Rarely<br>Sometimes<br>Often<br>Always | In the past 7 days |
| <b>b152</b> |      |  |  |  |  | EDANX07 | PROMIS Bank v1.0 - Anxiety | I felt like I needed help for my anxiety                   | Never<br>Rarely<br>Sometimes<br>Often<br>Always | In the past 7 days |
| <b>b152</b> |      |  |  |  |  | EDANX08 | PROMIS Bank v1.0 - Anxiety | I was concerned about my mental health                     | Never<br>Rarely<br>Sometimes<br>Often<br>Always | In the past 7 days |



|             |  |  |  |  |  |         |                               |                                                     |                                                 |                    |
|-------------|--|--|--|--|--|---------|-------------------------------|-----------------------------------------------------|-------------------------------------------------|--------------------|
| <b>b152</b> |  |  |  |  |  | EDANX12 | PROMIS Bank<br>v1.0 - Anxiety | I felt upset                                        | Never<br>Rarely<br>Sometimes<br>Often<br>Always | In the past 7 days |
| <b>b152</b> |  |  |  |  |  | EDANX13 | PROMIS Bank<br>v1.0 - Anxiety | I had a racing or pounding heart                    | Never<br>Rarely<br>Sometimes<br>Often<br>Always | In the past 7 days |
| <b>b152</b> |  |  |  |  |  | EDANX16 | PROMIS Bank<br>v1.0 - Anxiety | I was anxious if my normal routine<br>was disturbed | Never<br>Rarely<br>Sometimes<br>Often<br>Always | In the past 7 days |
| <b>b152</b> |  |  |  |  |  | EDANX18 | PROMIS Bank<br>v1.0 - Anxiety | I had sudden feelings of panic                      | Never<br>Rarely<br>Sometimes<br>Often<br>Always | In the past 7 days |
| <b>b152</b> |  |  |  |  |  | EDANX20 | PROMIS Bank<br>v1.0 - Anxiety | I was easily startled                               | Never<br>Rarely<br>Sometimes<br>Often<br>Always | In the past 7 days |
| <b>b152</b> |  |  |  |  |  | EDANX26 | PROMIS Bank<br>v1.0 - Anxiety | I felt fidgety                                      | Never<br>Rarely<br>Sometimes<br>Often<br>Always | In the past 7 days |
| <b>b152</b> |  |  |  |  |  | EDANX27 | PROMIS Bank<br>v1.0 - Anxiety | I felt something awful would happen                 | Never<br>Rarely<br>Sometimes<br>Often<br>Always | In the past 7 days |
| <b>b152</b> |  |  |  |  |  | EDANX30 | PROMIS Bank<br>v1.0 - Anxiety | I felt worried                                      | Never<br>Rarely<br>Sometimes<br>Often<br>Always | In the past 7 days |
| <b>b152</b> |  |  |  |  |  | EDANX33 | PROMIS Bank<br>v1.0 - Anxiety | I felt terrified                                    | Never<br>Rarely<br>Sometimes<br>Often<br>Always | In the past 7 days |

|             |  |  |  |  |  |         |                            |                                                |                                                 |                    |
|-------------|--|--|--|--|--|---------|----------------------------|------------------------------------------------|-------------------------------------------------|--------------------|
| <b>b152</b> |  |  |  |  |  | EDANX37 | PROMIS Bank v1.0 - Anxiety | I worried about other people's reactions to me | Never<br>Rarely<br>Sometimes<br>Often<br>Always | In the past 7 days |
| <b>b152</b> |  |  |  |  |  | EDANX41 | PROMIS Bank v1.0 - Anxiety | My worries overwhelmed me                      | Never<br>Rarely<br>Sometimes<br>Often<br>Always | In the past 7 days |
| <b>b152</b> |  |  |  |  |  | EDANX44 | PROMIS Bank v1.0 - Anxiety | I had twitching or trembling muscles           | Never<br>Rarely<br>Sometimes<br>Often<br>Always | In the past 7 days |
| <b>b152</b> |  |  |  |  |  | EDANX46 | PROMIS Bank v1.0 - Anxiety | I felt nervous                                 | Never<br>Rarely<br>Sometimes<br>Often<br>Always | In the past 7 days |
| <b>b152</b> |  |  |  |  |  | EDANX47 | PROMIS Bank v1.0 - Anxiety | I felt indecisive                              | Never<br>Rarely<br>Sometimes<br>Often<br>Always | In the past 7 days |
| <b>b152</b> |  |  |  |  |  | EDANX48 | PROMIS Bank v1.0 - Anxiety | Many situations made me worry                  | Never<br>Rarely<br>Sometimes<br>Often<br>Always | In the past 7 days |
| <b>b152</b> |  |  |  |  |  | EDANX51 | PROMIS Bank v1.0 - Anxiety | I had trouble relaxing                         | Never<br>Rarely<br>Sometimes<br>Often<br>Always | In the past 7 days |
| <b>b152</b> |  |  |  |  |  | EDANX53 | PROMIS Bank v1.0 - Anxiety | I felt uneasy                                  | Never<br>Rarely<br>Sometimes<br>Often<br>Always | In the past 7 days |
| <b>b152</b> |  |  |  |  |  | EDANX54 | PROMIS Bank v1.0 - Anxiety | I felt tense                                   | Never<br>Rarely<br>Sometimes<br>Often<br>Always | In the past 7 days |

|             |      |  |  |  |  |         |                                  |                                               |                                                 |                    |
|-------------|------|--|--|--|--|---------|----------------------------------|-----------------------------------------------|-------------------------------------------------|--------------------|
| <b>b152</b> |      |  |  |  |  | EDANX55 | PROMIS Bank<br>v1.0 - Anxiety    | I had difficulty calming down                 | Never<br>Rarely<br>Sometimes<br>Often<br>Always | In the past 7 days |
| <b>b152</b> | b130 |  |  |  |  | EDDEP54 | PROMIS Bank<br>v1.0 - Depression | I felt emotionally exhausted                  | Never<br>Rarely<br>Sometimes<br>Often<br>Always | In the past 7 days |
| <b>b152</b> |      |  |  |  |  | EDDEP04 | PROMIS Bank<br>v1.0 - Depression | I felt worthless                              | Never<br>Rarely<br>Sometimes<br>Often<br>Always | In the past 7 days |
| <b>b152</b> |      |  |  |  |  | EDDEP05 | PROMIS Bank<br>v1.0 - Depression | I felt that I had nothing to look forward to  | Never<br>Rarely<br>Sometimes<br>Often<br>Always | In the past 7 days |
| <b>b152</b> |      |  |  |  |  | EDDEP06 | PROMIS Bank<br>v1.0 - Depression | I felt helpless                               | Never<br>Rarely<br>Sometimes<br>Often<br>Always | In the past 7 days |
| <b>b152</b> |      |  |  |  |  | EDDEP14 | PROMIS Bank<br>v1.0 - Depression | I felt that I was not as good as other people | Never<br>Rarely<br>Sometimes<br>Often<br>Always | In the past 7 days |
| <b>b152</b> |      |  |  |  |  | EDDEP17 | PROMIS Bank<br>v1.0 - Depression | I felt sad                                    | Never<br>Rarely<br>Sometimes<br>Often<br>Always | In the past 7 days |
| <b>b152</b> |      |  |  |  |  | EDDEP19 | PROMIS Bank<br>v1.0 - Depression | I felt that I wanted to give up on everything | Never<br>Rarely<br>Sometimes<br>Often<br>Always | In the past 7 days |
| <b>b152</b> |      |  |  |  |  | EDDEP28 | PROMIS Bank<br>v1.0 - Depression | I felt lonely                                 | Never<br>Rarely<br>Sometimes<br>Often<br>Always | In the past 7 days |

|             |  |  |  |  |  |         |                                  |                                                     |                                                 |                    |
|-------------|--|--|--|--|--|---------|----------------------------------|-----------------------------------------------------|-------------------------------------------------|--------------------|
| <b>b152</b> |  |  |  |  |  | EDDEP29 | PROMIS Bank<br>v1.0 - Depression | I felt depressed                                    | Never<br>Rarely<br>Sometimes<br>Often<br>Always | In the past 7 days |
| <b>b152</b> |  |  |  |  |  | EDDEP31 | PROMIS Bank<br>v1.0 - Depression | I felt discouraged about the future                 | Never<br>Rarely<br>Sometimes<br>Often<br>Always | In the past 7 days |
| <b>b152</b> |  |  |  |  |  | EDDEP35 | PROMIS Bank<br>v1.0 - Depression | I found that things in my life were<br>overwhelming | Never<br>Rarely<br>Sometimes<br>Often<br>Always | In the past 7 days |
| <b>b152</b> |  |  |  |  |  | EDDEP36 | PROMIS Bank<br>v1.0 - Depression | I felt unhappy                                      | Never<br>Rarely<br>Sometimes<br>Often<br>Always | In the past 7 days |
| <b>b152</b> |  |  |  |  |  | EDDEP39 | PROMIS Bank<br>v1.0 - Depression | I felt I had no reason for living                   | Never<br>Rarely<br>Sometimes<br>Often<br>Always | In the past 7 days |
| <b>b152</b> |  |  |  |  |  | EDDEP41 | PROMIS Bank<br>v1.0 - Depression | I felt hopeless                                     | Never<br>Rarely<br>Sometimes<br>Often<br>Always | In the past 7 days |
| <b>b152</b> |  |  |  |  |  | EDDEP42 | PROMIS Bank<br>v1.0 - Depression | I felt ignored by people                            | Never<br>Rarely<br>Sometimes<br>Often<br>Always | In the past 7 days |
| <b>b152</b> |  |  |  |  |  | EDDEP44 | PROMIS Bank<br>v1.0 - Depression | I felt upset for no reason                          | Never<br>Rarely<br>Sometimes<br>Often<br>Always | In the past 7 days |
| <b>b152</b> |  |  |  |  |  | EDDEP45 | PROMIS Bank<br>v1.0 - Depression | I felt that nothing was interesting                 | Never<br>Rarely<br>Sometimes<br>Often<br>Always | In the past 7 days |

|             |      |  |  |  |  |         |                                       |                                           |                                                                                                                                             |                    |
|-------------|------|--|--|--|--|---------|---------------------------------------|-------------------------------------------|---------------------------------------------------------------------------------------------------------------------------------------------|--------------------|
| <b>b152</b> |      |  |  |  |  | EDDEP48 | PROMIS Bank<br>v1.0 - Depression      | I felt that my life was empty             | Never<br>Rarely<br>Sometimes<br>Often<br>Always                                                                                             | In the past 7 days |
| <b>b152</b> |      |  |  |  |  | EDDEP50 | PROMIS Bank<br>v1.0 - Depression      | I felt guilty                             | Never<br>Rarely<br>Sometimes<br>Often<br>Always                                                                                             | In the past 7 days |
| <b>b152</b> | d710 |  |  |  |  | EDANG56 | PROMIS Bank<br>v1.0 - Anger           | Just being around people irritated me     | Not at all<br>A little bit<br>Somewhat<br>Quite a bit<br>Very much                                                                          | In the past 7 days |
| <b>b160</b> |      |  |  |  |  | PC37    | PROMIS Applied<br>Cog Gen<br>Concerns | My thinking has been slower than<br>usual | 1=Never<br>2=Rarely (Once)<br>3=Sometimes (Two or<br>three times)<br>4=Often (About once a<br>day)<br>5=Very often (Several<br>times a day) | In the past 7 days |
| <b>b160</b> |      |  |  |  |  | PC1     | PROMIS Applied<br>Cog Gen<br>Concerns | I have had trouble forming thoughts       | 1=Never<br>2=Rarely (Once)<br>3=Sometimes (Two or<br>three times)<br>4=Often (About once a<br>day)<br>5=Very often (Several<br>times a day) | In the past 7 days |
| <b>b160</b> |      |  |  |  |  | PC2     | PROMIS Applied<br>Cog Gen<br>Concerns | My thinking has been slow                 | 1=Never<br>2=Rarely (Once)<br>3=Sometimes (Two or<br>three times)<br>4=Often (About once a<br>day)<br>5=Very often (Several<br>times a day) | In the past 7 days |
| <b>b160</b> |      |  |  |  |  | PC3     | PROMIS App Cog<br>Abilities           | My thinking has been foggy                | 1=Never<br>2=Rarely (Once)<br>3=Sometimes (Two or<br>three times)<br>4=Often (About once a<br>day)<br>5=Very often (Several<br>times a day) | In the past 7 days |

|             |  |  |  |  |  |           |                                 |                                                                    |                                                                                                                                    |                    |
|-------------|--|--|--|--|--|-----------|---------------------------------|--------------------------------------------------------------------|------------------------------------------------------------------------------------------------------------------------------------|--------------------|
| <b>b160</b> |  |  |  |  |  | PC43_2    | PROMIS Applied Cog Gen Concerns | My mind has been as sharp as usual                                 | 1=Not at all<br>2=A little bit<br>3=Somewhat<br>4=Quite a bit<br>5=Very much                                                       | In the past 7 days |
| <b>b160</b> |  |  |  |  |  | PC45_2    | PROMIS Applied Cog Gen Concerns | My thinking has been as fast as usual                              | 1=Not at all<br>2=A little bit<br>3=Somewhat<br>4=Quite a bit<br>5=Very much                                                       | In the past 7 days |
| <b>b160</b> |  |  |  |  |  | PC4       | PROMIS App Cog Abilities        | I have been able to think clearly                                  | 1=Not at all<br>2=A little bit<br>3=Somewhat<br>4=Quite a bit<br>5=Very much                                                       | In the past 7 days |
| <b>b160</b> |  |  |  |  |  | PC-CaPS1  | PROMIS App Cog Abilities        | I have been able to form thoughts clearly                          | 1=Not at all<br>2=A little bit<br>3=Somewhat<br>4=Quite a bit<br>5=Very much                                                       | In the past 7 days |
| <b>b160</b> |  |  |  |  |  | PC-CaPS13 | PROMIS App Cog Abilities        | I have been able to think as clearly as usual without extra effort | 1=Not at all<br>2=A little bit<br>3=Somewhat<br>4=Quite a bit<br>5=Very much                                                       | In the past 7 days |
| <b>b160</b> |  |  |  |  |  | PC-CaPS2  | PROMIS App Cog Abilities        | My thinking has been clear                                         | 1=Not at all<br>2=A little bit<br>3=Somewhat<br>4=Quite a bit<br>5=Very much                                                       | In the past 7 days |
| <b>b160</b> |  |  |  |  |  | PC-CaPS3  | PROMIS App Cog Abilities        | I have been able to think clearly without extra effort             | 1=Not at all<br>2=A little bit<br>3=Somewhat<br>4=Quite a bit<br>5=Very much                                                       | In the past 7 days |
| <b>b164</b> |  |  |  |  |  | PC28      | PROMIS App Cog Abilities        | My reactions in everyday situations have been slow                 | 1=Never<br>2=Rarely (Once)<br>3=Sometimes (Two or three times)<br>4=Often (About once a day)<br>5=Very often (Several times a day) | In the past 7 days |
| <b>b164</b> |  |  |  |  |  | EDDEP30   | PROMIS Bank v1.0 - Depression   | I had trouble making decisions                                     | Never<br>Rarely<br>Sometimes<br>Often<br>Always                                                                                    | In the past 7 days |

|             |  |  |  |  |  |      |                                       |                                                                                             |                                                                                                                                             |                    |
|-------------|--|--|--|--|--|------|---------------------------------------|---------------------------------------------------------------------------------------------|---------------------------------------------------------------------------------------------------------------------------------------------|--------------------|
| <b>b167</b> |  |  |  |  |  | PC38 | PROMIS Applied<br>Cog Gen<br>Concerns | I have had to work harder than usual<br>to express myself clearly                           | 1=Never<br>2=Rarely (Once)<br>3=Sometimes (Two or<br>three times)<br>4=Often (About once a<br>day)<br>5=Very often (Several<br>times a day) | In the past 7 days |
| <b>b167</b> |  |  |  |  |  | PC39 | PROMIS Applied<br>Cog Gen<br>Concerns | I have had more problems conversing<br>with others                                          | 1=Never<br>2=Rarely (Once)<br>3=Sometimes (Two or<br>three times)<br>4=Often (About once a<br>day)<br>5=Very often (Several<br>times a day) | In the past 7 days |
| <b>b167</b> |  |  |  |  |  | PC15 | PROMIS Applied<br>Cog Gen<br>Concerns | Words I wanted to use have seemed<br>to be on the "tip of my tongue"                        | 1=Never<br>2=Rarely (Once)<br>3=Sometimes (Two or<br>three times)<br>4=Often (About once a<br>day)<br>5=Very often (Several<br>times a day) | In the past 7 days |
| <b>b167</b> |  |  |  |  |  | PC16 | PROMIS Applied<br>Cog Gen<br>Concerns | I have had trouble finding the right<br>word(s) to express myself                           | 1=Never<br>2=Rarely (Once)<br>3=Sometimes (Two or<br>three times)<br>4=Often (About once a<br>day)<br>5=Very often (Several<br>times a day) | In the past 7 days |
| <b>b167</b> |  |  |  |  |  | PC18 | PROMIS Applied<br>Cog Gen<br>Concerns | I have had trouble speaking fluently                                                        | 1=Never<br>2=Rarely (Once)<br>3=Sometimes (Two or<br>three times)<br>4=Often (About once a<br>day)<br>5=Very often (Several<br>times a day) | In the past 7 days |
| <b>b167</b> |  |  |  |  |  | PC20 | PROMIS Applied<br>Cog Gen<br>Concerns | I have been able to bring to mind<br>words that I wanted to use while<br>talking to someone | 1=Not at all<br>2=A little bit<br>3=Somewhat<br>4=Quite a bit<br>5=Very much                                                                | In the past 7 days |

|             |      |  |  |  |  |           |                                  |                                                                            |                                                                                                                                    |                    |
|-------------|------|--|--|--|--|-----------|----------------------------------|----------------------------------------------------------------------------|------------------------------------------------------------------------------------------------------------------------------------|--------------------|
| <b>b167</b> |      |  |  |  |  | PC-CaPS11 | PROMIS App Cog Abilities         | I have been able to get my point across when talking with someone          | 1=Not at all<br>2=A little bit<br>3=Somewhat<br>4=Quite a bit<br>5=Very much                                                       | In the past 7 days |
| <b>b172</b> |      |  |  |  |  | PC5       | PROMIS App Cog Abilities         | I have had trouble adding or subtracting numbers in my head                | 1=Never<br>2=Rarely (Once)<br>3=Sometimes (Two or three times)<br>4=Often (About once a day)<br>5=Very often (Several times a day) | In the past 7 days |
| <b>b172</b> |      |  |  |  |  | PC-CaPS20 | PROMIS Applied Cog Gen Concerns  | My ability to count money has been as good as usual                        | 1=Not at all<br>2=A little bit<br>3=Somewhat<br>4=Quite a bit<br>5=Very much                                                       | In the past 7 days |
| <b>b172</b> |      |  |  |  |  | PC-CaPS7  | PROMIS App Cog Abilities         | I have been able to add and subtract numbers in my head without difficulty | 1=Not at all<br>2=A little bit<br>3=Somewhat<br>4=Quite a bit<br>5=Very much                                                       | In the past 7 days |
| <b>b280</b> |      |  |  |  |  | PAINQU6   | Adult Pain Intensity             | How intense was your pain at its <u>worst</u> ?                            | 1 = Had no pain<br>2 = Mild<br>3 = Moderate<br>4 = Severe<br>5 = Very Severe                                                       | In the past 7 days |
| <b>b280</b> |      |  |  |  |  | PAINQU8   | Adult Pain Intensity             | How intense was your <u>average</u> pain?                                  | 1 = Had no pain<br>2 = Mild<br>3 = Moderate<br>4 = Severe<br>5 = Very Severe                                                       | In the past 7 days |
| <b>b280</b> |      |  |  |  |  | PAINQU21  | Adult Pain Intensity             | What is your level of pain <u>right now</u> ?                              | 1 = Had no pain<br>2 = Mild<br>3 = Moderate<br>4 = Severe<br>5 = Very Severe                                                       |                    |
| <b>b280</b> | b126 |  |  |  |  | PAINBE9   | PROMIS Bank v1.0 - Pain Behavior | When I was in pain I became angry                                          | Had no pain<br>Never<br>Rarely<br>Sometimes<br>Often<br>Always                                                                     | In the past 7 days |



|             |      |  |  |  |  |          |                                  |                                                                                       |                                                                |                    |
|-------------|------|--|--|--|--|----------|----------------------------------|---------------------------------------------------------------------------------------|----------------------------------------------------------------|--------------------|
| <b>b280</b> | b126 |  |  |  |  | PAINBE27 | PROMIS Bank v1.0 - Pain Behavior | I had pain so bad it made me cry                                                      | Had no pain<br>Never<br>Rarely<br>Sometimes<br>Often<br>Always | In the past 7 days |
| <b>b280</b> | b126 |  |  |  |  | PAINBE32 | PROMIS Bank v1.0 - Pain Behavior | When I was in pain I became quiet and withdrawn                                       | Had no pain<br>Never<br>Rarely<br>Sometimes<br>Often<br>Always | In the past 7 days |
| <b>b280</b> | b126 |  |  |  |  | PAINBE37 | PROMIS Bank v1.0 - Pain Behavior | When I was in pain I isolated myself from others                                      | Had no pain<br>Never<br>Rarely<br>Sometimes<br>Often<br>Always | In the past 7 days |
| <b>b280</b> | d230 |  |  |  |  | PAINBE18 | PROMIS Bank v1.0 - Pain Behavior | When I was in pain I asked for help doing things that needed to be done               | Had no pain<br>Never<br>Rarely<br>Sometimes<br>Often<br>Always | In the past 7 days |
| <b>b280</b> | d335 |  |  |  |  | PAINBE3  | PROMIS Bank v1.0 - Pain Behavior | When I was in pain I grimaced                                                         | Had no pain<br>Never<br>Rarely<br>Sometimes<br>Often<br>Always | In the past 7 days |
| <b>b280</b> | d335 |  |  |  |  | PAINBE11 | PROMIS Bank v1.0 - Pain Behavior | When I was in pain I clenched my teeth                                                | Had no pain<br>Never<br>Rarely<br>Sometimes<br>Often<br>Always | In the past 7 days |
| <b>b280</b> | d335 |  |  |  |  | PAINBE16 | PROMIS Bank v1.0 - Pain Behavior | When I was in pain I appeared upset or sad                                            | Had no pain<br>Never<br>Rarely<br>Sometimes<br>Often<br>Always | In the past 7 days |
| <b>b280</b> | d335 |  |  |  |  | PAINBE21 | PROMIS Bank v1.0 - Pain Behavior | When I was in pain it showed on my face (squincing eyes, opening eyes wide, frowning) | Had no pain<br>Never<br>Rarely<br>Sometimes<br>Often<br>Always | In the past 7 days |

|             |      |      |  |  |  |          |                                  |                                                                |                                                                |                    |
|-------------|------|------|--|--|--|----------|----------------------------------|----------------------------------------------------------------|----------------------------------------------------------------|--------------------|
| <b>b280</b> | d335 |      |  |  |  | PAINBE28 | PROMIS Bank v1.0 - Pain Behavior | When I was in pain I squirmed                                  | Had no pain<br>Never<br>Rarely<br>Sometimes<br>Often<br>Always | In the past 7 days |
| <b>b280</b> | d335 |      |  |  |  | PAINBE33 | PROMIS Bank v1.0 - Pain Behavior | When I was in pain I frowned                                   | Had no pain<br>Never<br>Rarely<br>Sometimes<br>Often<br>Always | In the past 7 days |
| <b>b280</b> | d4   | b720 |  |  |  | PAINBE24 | PROMIS Bank v1.0 - Pain Behavior | When I was in pain I moved stiffly                             | Had no pain<br>Never<br>Rarely<br>Sometimes<br>Often<br>Always | In the past 7 days |
| <b>b280</b> | d4   |      |  |  |  | PAINBE6  | PROMIS Bank v1.0 - Pain Behavior | When I was in pain I would lie down                            | Had no pain<br>Never<br>Rarely<br>Sometimes<br>Often<br>Always | In the past 7 days |
| <b>b280</b> | d4   |      |  |  |  | PAINBE8  | PROMIS Bank v1.0 - Pain Behavior | When I was in pain I moved extremely slowly                    | Had no pain<br>Never<br>Rarely<br>Sometimes<br>Often<br>Always | In the past 7 days |
| <b>b280</b> | d4   |      |  |  |  | PAINBE13 | PROMIS Bank v1.0 - Pain Behavior | When I was in pain I tried to stay very still                  | Had no pain<br>Never<br>Rarely<br>Sometimes<br>Often<br>Always | In the past 7 days |
| <b>b280</b> | d4   |      |  |  |  | PAINBE29 | PROMIS Bank v1.0 - Pain Behavior | When I was in pain I used a cane or something else for support | Had no pain<br>Never<br>Rarely<br>Sometimes<br>Often<br>Always | In the past 7 days |
| <b>b280</b> | d4   |      |  |  |  | PAINBE31 | PROMIS Bank v1.0 - Pain Behavior | I limped because of pain                                       | Had no pain<br>Never<br>Rarely<br>Sometimes<br>Often<br>Always | In the past 7 days |

|             |      |      |  |  |  |          |                                  |                                                                        |                                                                |                    |
|-------------|------|------|--|--|--|----------|----------------------------------|------------------------------------------------------------------------|----------------------------------------------------------------|--------------------|
| <b>b280</b> | d4   |      |  |  |  | PAINBE50 | PROMIS Bank v1.0 - Pain Behavior | When I was in pain I moved my limbs protectively                       | Had no pain<br>Never<br>Rarely<br>Sometimes<br>Often<br>Always | In the past 7 days |
| <b>b280</b> | d450 | d410 |  |  |  | PAINBE34 | PROMIS Bank v1.0 - Pain Behavior | When I was in pain I asked for help when walking or changing positions | Had no pain<br>Never<br>Rarely<br>Sometimes<br>Often<br>Always | In the past 7 days |
| <b>b280</b> | d450 |      |  |  |  | PAINBE22 | PROMIS Bank v1.0 - Pain Behavior | Pain caused me to bend over while walking                              | Had no pain<br>Never<br>Rarely<br>Sometimes<br>Often<br>Always | In the past 7 days |
| <b>b280</b> | d450 |      |  |  |  | PAINBE43 | PROMIS Bank v1.0 - Pain Behavior | When I was in pain I walked carefully                                  | Had no pain<br>Never<br>Rarely<br>Sometimes<br>Often<br>Always | In the past 7 days |
| <b>b280</b> | d710 |      |  |  |  | PAINBE23 | PROMIS Bank v1.0 - Pain Behavior | When I was in pain I asked one or more people to leave me alone        | Had no pain<br>Never<br>Rarely<br>Sometimes<br>Often<br>Always | In the past 7 days |
| <b>b280</b> | d710 |      |  |  |  | PAINBE51 | PROMIS Bank v1.0 - Pain Behavior | When I was in pain I avoided physical contact with others              | Had no pain<br>Never<br>Rarely<br>Sometimes<br>Often<br>Always | In the past 7 days |
| <b>b280</b> |      |      |  |  |  | PAINBE17 | PROMIS Bank v1.0 - Pain Behavior | When I was in pain I gasped                                            | Had no pain<br>Never<br>Rarely<br>Sometimes<br>Often<br>Always | In the past 7 days |
| <b>b280</b> |      |      |  |  |  | PAINBE25 | PROMIS Bank v1.0 - Pain Behavior | When I was in pain I called out for someone to help me                 | Had no pain<br>Never<br>Rarely<br>Sometimes<br>Often<br>Always | In the past 7 days |

|             |  |  |  |  |  |          |                                  |                                                    |                                                                |                    |
|-------------|--|--|--|--|--|----------|----------------------------------|----------------------------------------------------|----------------------------------------------------------------|--------------------|
| <b>b280</b> |  |  |  |  |  | PAINBE26 | PROMIS Bank v1.0 - Pain Behavior | Pain caused me to curl up in a ball                | Had no pain<br>Never<br>Rarely<br>Sometimes<br>Often<br>Always | In the past 7 days |
| <b>b280</b> |  |  |  |  |  | PAINBE35 | PROMIS Bank v1.0 - Pain Behavior | When I was in pain I groaned                       | Had no pain<br>Never<br>Rarely<br>Sometimes<br>Often<br>Always | In the past 7 days |
| <b>b280</b> |  |  |  |  |  | PAINBE38 | PROMIS Bank v1.0 - Pain Behavior | When I was in pain I drew my knees up              | Had no pain<br>Never<br>Rarely<br>Sometimes<br>Often<br>Always | In the past 7 days |
| <b>b280</b> |  |  |  |  |  | PAINBE39 | PROMIS Bank v1.0 - Pain Behavior | When I was in pain I moaned, whined or whimpered   | Had no pain<br>Never<br>Rarely<br>Sometimes<br>Often<br>Always | In the past 7 days |
| <b>b280</b> |  |  |  |  |  | PAINBE40 | PROMIS Bank v1.0 - Pain Behavior | When I was in pain I flung my arms or limbs around | Had no pain<br>Never<br>Rarely<br>Sometimes<br>Often<br>Always | In the past 7 days |
| <b>b280</b> |  |  |  |  |  | PAINBE41 | PROMIS Bank v1.0 - Pain Behavior | When I was in pain I screamed                      | Had no pain<br>Never<br>Rarely<br>Sometimes<br>Often<br>Always | In the past 7 days |
| <b>b280</b> |  |  |  |  |  | PAINBE42 | PROMIS Bank v1.0 - Pain Behavior | When I was in pain my upper body would tense up    | Had no pain<br>Never<br>Rarely<br>Sometimes<br>Often<br>Always | In the past 7 days |
| <b>b280</b> |  |  |  |  |  | PAINBE44 | PROMIS Bank v1.0 - Pain Behavior | When I was in pain I bit or pursed my lips         | Had no pain<br>Never<br>Rarely<br>Sometimes<br>Often<br>Always | In the past 7 days |

|             |       |      |  |  |  |          |                                      |                                                                         |                                                                                      |                    |
|-------------|-------|------|--|--|--|----------|--------------------------------------|-------------------------------------------------------------------------|--------------------------------------------------------------------------------------|--------------------|
| <b>b280</b> |       |      |  |  |  | PAINBE45 | PROMIS Bank v1.0 - Pain Behavior     | When I was in pain I thrashed                                           | Had no pain<br>Never<br>Rarely<br>Sometimes<br>Often<br>Always                       | In the past 7 days |
| <b>b280</b> |       |      |  |  |  | PAINBE46 | PROMIS Bank v1.0 - Pain Behavior     | When I was in pain I protected the part of my body that hurt            | Had no pain<br>Never<br>Rarely<br>Sometimes<br>Often<br>Always                       | In the past 7 days |
| <b>b280</b> |       |      |  |  |  | PAINBE47 | PROMIS Bank v1.0 - Pain Behavior     | When I was in pain my body became stiff                                 | Had no pain<br>Never<br>Rarely<br>Sometimes<br>Often<br>Always                       | In the past 7 days |
| <b>b280</b> |       |      |  |  |  | PAINBE48 | PROMIS Bank v1.0 - Pain Behavior     | When I was in pain I clenched my jaw or gritted my teeth                | Had no pain<br>Never<br>Rarely<br>Sometimes<br>Often<br>Always                       | In the past 7 days |
| <b>b280</b> |       |      |  |  |  | PAINBE49 | PROMIS Bank v1.0 - Pain Behavior     | When I was in pain I winced                                             | Had no pain<br>Never<br>Rarely<br>Sometimes<br>Often<br>Always                       | In the past 7 days |
| <b>b280</b> | d410  |      |  |  |  | PAININ54 | PROMIS Bank v1.0 - Pain Interference | How often did pain keep you from getting into a standing position?      | Never<br>Once a week or less<br>Once every few days<br>Once a day<br>Every few hours | In the past 7 days |
| <b>b280</b> | b140  |      |  |  |  | PAININ29 | PROMIS Bank v1.0 - Pain Interference | How often was your pain so severe you could think of nothing else?      | Never<br>Rarely<br>Sometimes<br>Often<br>Always                                      | In the past 7 days |
| <b>b280</b> | b1641 | d920 |  |  |  | PAININ46 | PROMIS Bank v1.0 - Pain Interference | How often did pain make it difficult for you to plan social activities? | Never<br>Rarely<br>Sometimes<br>Often<br>Always                                      | In the past 7 days |

|             |      |  |  |  |  |          |                                      |                                                                        |                                                 |                    |
|-------------|------|--|--|--|--|----------|--------------------------------------|------------------------------------------------------------------------|-------------------------------------------------|--------------------|
| <b>b280</b> | d910 |  |  |  |  | PAININ53 | PROMIS Bank v1.0 - Pain Interference | How often did pain restrict your social life to your home?             | Never<br>Rarely<br>Sometimes<br>Often<br>Always | In the past 7 days |
| <b>b280</b> | d920 |  |  |  |  | PAININ26 | PROMIS Bank v1.0 - Pain Interference | How often did pain keep you from socializing with others?              | Never<br>Rarely<br>Sometimes<br>Often<br>Always | In the past 7 days |
| <b>b280</b> | b126 |  |  |  |  | PAININ16 | PROMIS Bank v1.0 - Pain Interference | How often did pain make you feel depressed?                            | Never<br>Rarely<br>Sometimes<br>Often<br>Always | In the past 7 days |
| <b>b280</b> | b126 |  |  |  |  | PAININ32 | PROMIS Bank v1.0 - Pain Interference | How often did pain make you feel discouraged?                          | Never<br>Rarely<br>Sometimes<br>Often<br>Always | In the past 7 days |
| <b>b280</b> | b126 |  |  |  |  | PAININ37 | PROMIS Bank v1.0 - Pain Interference | How often did pain make you feel anxious?                              | Never<br>Rarely<br>Sometimes<br>Often<br>Always | In the past 7 days |
| <b>b280</b> | d210 |  |  |  |  | PAININ39 | PROMIS Bank v1.0 - Pain Interference | How often did pain make simple tasks hard to complete?                 | Never<br>Rarely<br>Sometimes<br>Often<br>Always | In the past 7 days |
| <b>b280</b> | d415 |  |  |  |  | PAININ42 | PROMIS Bank v1.0 - Pain Interference | How often did pain prevent you from standing for more than one hour?   | Never<br>Rarely<br>Sometimes<br>Often<br>Always | In the past 7 days |
| <b>b280</b> | d415 |  |  |  |  | PAININ47 | PROMIS Bank v1.0 - Pain Interference | How often did pain prevent you from standing for more than 30 minutes? | Never<br>Rarely<br>Sometimes<br>Often<br>Always | In the past 7 days |
| <b>b280</b> | d415 |  |  |  |  | PAININ50 | PROMIS Bank v1.0 - Pain Interference | How often did pain prevent you from sitting for more than 30 minutes?  | Never<br>Rarely<br>Sometimes<br>Often<br>Always | In the past 7 days |

|             |      |  |  |  |  |          |                                      |                                                                                                  |                                                                    |                    |
|-------------|------|--|--|--|--|----------|--------------------------------------|--------------------------------------------------------------------------------------------------|--------------------------------------------------------------------|--------------------|
| <b>b280</b> | d415 |  |  |  |  | PAININ51 | PROMIS Bank v1.0 - Pain Interference | How often did pain prevent you from sitting for more than 10 minutes?                            | Never<br>Rarely<br>Sometimes<br>Often<br>Always                    | In the past 7 days |
| <b>b280</b> | d415 |  |  |  |  | PAININ55 | PROMIS Bank v1.0 - Pain Interference | How often did pain prevent you from sitting for more than one hour?                              | Never<br>Rarely<br>Sometimes<br>Often<br>Always                    | In the past 7 days |
| <b>b280</b> | d450 |  |  |  |  | PAININ40 | PROMIS Bank v1.0 - Pain Interference | How often did pain prevent you from walking more than 1 mile?                                    | Never<br>Rarely<br>Sometimes<br>Often<br>Always                    | In the past 7 days |
| <b>b280</b> | d920 |  |  |  |  | PAININ38 | PROMIS Bank v1.0 - Pain Interference | How often did you avoid social activities because it might make you hurt more?                   | Never<br>Rarely<br>Sometimes<br>Often<br>Always                    | In the past 7 days |
| <b>b280</b> | d920 |  |  |  |  | PAININ52 | PROMIS Bank v1.0 - Pain Interference | How often was it hard to plan social activities because you didn't know if you would be in pain? | Never<br>Rarely<br>Sometimes<br>Often<br>Always                    | In the past 7 days |
| <b>b280</b> |      |  |  |  |  | PAININ24 | PROMIS Bank v1.0 - Pain Interference | How often was pain distressing to you?                                                           | Never<br>Rarely<br>Sometimes<br>Often<br>Always                    | In the past 7 days |
| <b>b280</b> | b144 |  |  |  |  | PAININ49 | PROMIS Bank v1.0 - Pain Interference | How much did pain interfere with your ability to remember things?                                | Not at all<br>A little bit<br>Somewhat<br>Quite a bit<br>Very much | In the past 7 days |
| <b>b280</b> | d230 |  |  |  |  | PAININ9  | PROMIS Bank v1.0 - Pain Interference | How much did pain interfere with your day to day activities?                                     | Not at all<br>A little bit<br>Somewhat<br>Quite a bit<br>Very much | In the past 7 days |
| <b>b280</b> | d640 |  |  |  |  | PAININ34 | PROMIS Bank v1.0 - Pain Interference | How much did pain interfere with your household chores?                                          | Not at all<br>A little bit<br>Somewhat<br>Quite a bit<br>Very much | In the past 7 days |

|             |      |      |      |      |  |          |                                      |                                                                                     |                                                                    |                    |
|-------------|------|------|------|------|--|----------|--------------------------------------|-------------------------------------------------------------------------------------|--------------------------------------------------------------------|--------------------|
| <b>b280</b> | d640 |      |      |      |  | PAININ48 | PROMIS Bank v1.0 - Pain Interference | How much did pain interfere with your ability to do household chores?               | Not at all<br>A little bit<br>Somewhat<br>Quite a bit<br>Very much | In the past 7 days |
| <b>b280</b> | d640 |      |      |      |  | PAININ22 | PROMIS Bank v1.0 - Pain Interference | How much did pain interfere with work around the home?                              | Not at all<br>A little bit<br>Somewhat<br>Quite a bit<br>Very much | In the past 7 days |
| <b>b280</b> | d750 | d920 | d760 | d770 |  | PAININ17 | PROMIS Bank v1.0 - Pain Interference | How much did pain interfere with your relationships with other people?              | Not at all<br>A little bit<br>Somewhat<br>Quite a bit<br>Very much | In the past 7 days |
| <b>b280</b> | d760 |      |      |      |  | PAININ13 | PROMIS Bank v1.0 - Pain Interference | How much did pain interfere with your family life?                                  | Not at all<br>A little bit<br>Somewhat<br>Quite a bit<br>Very much | In the past 7 days |
| <b>b280</b> | d770 |      |      |      |  | PAININ6  | PROMIS Bank v1.0 - Pain Interference | How much did pain interfere with your close personal relationships?                 | Not at all<br>A little bit<br>Somewhat<br>Quite a bit<br>Very much | In the past 7 days |
| <b>b280</b> | d920 |      |      |      |  | PAININ5  | PROMIS Bank v1.0 - Pain Interference | How much did pain interfere with your ability to participate in leisure activities? | Not at all<br>A little bit<br>Somewhat<br>Quite a bit<br>Very much | In the past 7 days |
| <b>b280</b> | d920 |      |      |      |  | PAININ10 | PROMIS Bank v1.0 - Pain Interference | How much did pain interfere with your enjoyment of recreational activities?         | Not at all<br>A little bit<br>Somewhat<br>Quite a bit<br>Very much | In the past 7 days |
| <b>b280</b> | b126 |      |      |      |  | PAININ3  | PROMIS Bank v1.0 - Pain Interference | How much did pain interfere with your enjoyment of life?                            | Not at all<br>A little bit<br>Somewhat<br>Quite a bit<br>Very much | In the past 7 days |
| <b>b280</b> | b126 |      |      |      |  | PAININ11 | PROMIS Bank v1.0 - Pain Interference | How often did you feel emotionally tense because of your pain?                      | Not at all<br>A little bit<br>Somewhat<br>Quite a bit<br>Very much | In the past 7 days |



|             |               |      |  |  |  |          |                                      |                                                                                                                 |                                                                    |                    |
|-------------|---------------|------|--|--|--|----------|--------------------------------------|-----------------------------------------------------------------------------------------------------------------|--------------------------------------------------------------------|--------------------|
| <b>b280</b> | b126          |      |  |  |  | PAININ56 | PROMIS Bank v1.0 - Pain Interference | How irritable did you feel because of pain?                                                                     | Not at all<br>A little bit<br>Somewhat<br>Quite a bit<br>Very much | In the past 7 days |
| <b>b280</b> | b134          |      |  |  |  | PAININ19 | PROMIS Bank v1.0 - Pain Interference | How much did pain make it difficult to fall asleep?                                                             | Not at all<br>A little bit<br>Somewhat<br>Quite a bit<br>Very much | In the past 7 days |
| <b>b280</b> | b140          |      |  |  |  | PAININ1  | PROMIS Bank v1.0 - Pain Interference | How difficult was it for you to take in new information because of pain?                                        | Not at all<br>A little bit<br>Somewhat<br>Quite a bit<br>Very much | In the past 7 days |
| <b>b280</b> | b140          |      |  |  |  | PAININ8  | PROMIS Bank v1.0 - Pain Interference | How much did pain interfere with your ability to concentrate?                                                   | Not at all<br>A little bit<br>Somewhat<br>Quite a bit<br>Very much | In the past 7 days |
| <b>b280</b> | d460          | d620 |  |  |  | PAININ14 | PROMIS Bank v1.0 - Pain Interference | How much did pain interfere with doing your tasks away from home (e.g., getting groceries, running errands)?    | Not at all<br>A little bit<br>Somewhat<br>Quite a bit<br>Very much | In the past 7 days |
| <b>b280</b> | d460          |      |  |  |  | PAININ35 | PROMIS Bank v1.0 - Pain Interference | How much did pain interfere with your ability to make trips from home that kept you gone for more than 2 hours? | Not at all<br>A little bit<br>Somewhat<br>Quite a bit<br>Very much | In the past 7 days |
| <b>b280</b> | d840-<br>d859 | d640 |  |  |  | PAININ18 | PROMIS Bank v1.0 - Pain Interference | How much did pain interfere with your ability to work (include work at home)?                                   | Not at all<br>A little bit<br>Somewhat<br>Quite a bit<br>Very much | In the past 7 days |
| <b>b280</b> | d920          |      |  |  |  | PAININ12 | PROMIS Bank v1.0 - Pain Interference | How much did pain interfere with the things you usually do for fun?                                             | Not at all<br>A little bit<br>Somewhat<br>Quite a bit<br>Very much | In the past 7 days |
| <b>b280</b> | d920          |      |  |  |  | PAININ31 | PROMIS Bank v1.0 - Pain Interference | How much did pain interfere with your ability to participate in social activities?                              | Not at all<br>A little bit<br>Somewhat<br>Quite a bit<br>Very much | In the past 7 days |

|              |      |      |      |  |  |          |                                      |                                                                        |                                                                                                                    |                    |
|--------------|------|------|------|--|--|----------|--------------------------------------|------------------------------------------------------------------------|--------------------------------------------------------------------------------------------------------------------|--------------------|
| <b>b280</b>  | d920 |      |      |  |  | PAININ36 | PROMIS Bank v1.0 - Pain Interference | How much did pain interfere with your enjoyment of social activities?  | Not at all<br>A little bit<br>Somewhat<br>Quite a bit<br>Very much                                                 | In the past 7 days |
| <b>b280</b>  |      |      |      |  |  | PAININ20 | PROMIS Bank v1.0 - Pain Interference | How much did pain feel like a burden to you?                           | Not at all<br>A little bit<br>Somewhat<br>Quite a bit<br>Very much                                                 | In the past 7 days |
| <b>b280,</b> | b126 |      |      |  |  | PAINBE2  | PROMIS Bank v1.0 - Pain Behavior     | When I was in pain I became irritable                                  | Had no pain<br>Never<br>Rarely<br>Sometimes<br>Often<br>Always                                                     | In the past 7 days |
| <b>b455</b>  | b730 | d850 | d855 |  |  | PFC12    | PROMIS Bank v1.0 - Physical Function | Does your health now limit you in doing two hours of physical labor?   | Not at all<br>Very little<br>Somewhat<br>Quite a lot<br>Cannot do                                                  |                    |
| <b>b455</b>  | b730 | d850 | d855 |  |  | PFC35    | PROMIS Bank v1.0 - Physical Function | Does your health now limit you in doing eight hours of physical labor? | Not at all<br>Very little<br>Somewhat<br>Quite a lot<br>Cannot do                                                  |                    |
| <b>b455</b>  |      |      |      |  |  | PFC10    | PROMIS Bank v1.0 - Physical Function | Does your health now limit you in climbing several flights of stairs?  | Not at all<br>Very little<br>Somewhat<br>Quite a lot<br>Cannot do                                                  |                    |
| <b>b455</b>  | d570 | d920 |      |  |  | PFA13    | PROMIS Bank v1.0 - Physical Function | Are you able to exercise for an hour?                                  | Without any difficulty<br>With a little difficulty<br>With some difficulty<br>With much difficulty<br>Unable to do |                    |
| <b>b455</b>  | d570 |      |      |  |  | PFA33    | PROMIS Bank v1.0 - Physical Function | Are you able to exercise hard for half an hour?                        | Without any difficulty<br>With a little difficulty<br>With some difficulty<br>With much difficulty<br>Unable to do |                    |

|             |  |  |  |  |      |          |                                               |                                                                                                                                                                                                                                                    |                                                                                                                                                       |                                                                                                                                                                                                                                        |
|-------------|--|--|--|--|------|----------|-----------------------------------------------|----------------------------------------------------------------------------------------------------------------------------------------------------------------------------------------------------------------------------------------------------|-------------------------------------------------------------------------------------------------------------------------------------------------------|----------------------------------------------------------------------------------------------------------------------------------------------------------------------------------------------------------------------------------------|
| <b>b455</b> |  |  |  |  | PERF | PFA33    | PROMIS<br>PhysFuncMobility-<br>Aids           | Are you able to exercise hard for half an hour?                                                                                                                                                                                                    |                                                                                                                                                       | The following questions ask about your ability to stand and move with and without support. "Support" means using items such as canes, walking sticks walkers and leg braces, or other people. Can you stand (with or without support)? |
| <b>b640</b> |  |  |  |  |      | SFEFN104 | PROMIS<br>SexualFunx<br>Erectile Men only     | How often have your erections been physically uncomfortable or painful? (If you use pills, injections, or a penis pump to help you get an erection, please answer this question thinking about the times that you used these aids.)                | 0 = Have not had an erection in the past 30 days<br>5 = Never<br>4 = Rarely<br>3 = Sometimes<br>2 = Often<br>1 = Always                               | In the past 30 days                                                                                                                                                                                                                    |
| <b>b640</b> |  |  |  |  |      | SFEFN103 | PROMIS<br>SexualFunx<br>Erectile Men only     | How difficult has it been to keep an erection (stay hard) when you wanted to? (If you normally use pills, injections, or a penis pump to help you get an erection, please answer this question thinking about the times that you used these aids.) | 0 = Have not had an erection in the past 30 days<br>5 = Not at all<br>4 = A little bit<br>3 = Somewhat<br>2 = Quite a bit<br>1 = Very                 | In the past 30 days                                                                                                                                                                                                                    |
| <b>b640</b> |  |  |  |  |      | SFLUB002 | PROMIS Sexual<br>Lubrication (<br>Women only) | How <l>difficult</l> was it to become lubricated ("wet") during sexual activity or intercourse?                                                                                                                                                    | 0 = No sexual activity<br>1 = Extremely difficult or impossible<br>2 = Very difficult<br>3 = Difficult<br>4 = Slightly difficult<br>5 = Not difficult | Over the past 4 weeks                                                                                                                                                                                                                  |
| <b>b640</b> |  |  |  |  |      | SFLUB004 | PROMIS Sexual<br>Lubrication (<br>Women only) | How <l>difficult</l> was it to maintain your lubrication ("wetness") until completion of sexual activity or intercourse?                                                                                                                           | 0 = No sexual activity<br>1 = Extremely difficult or impossible<br>2 = Very difficult<br>3 = Difficult<br>4 = Slightly difficult<br>5 = Not difficult | Over the past 4 weeks                                                                                                                                                                                                                  |

|             |      |  |  |  |  |          |                                         |                                                                                                                                                                                                                                      |                                                                                                                                                                                                                    |                       |
|-------------|------|--|--|--|--|----------|-----------------------------------------|--------------------------------------------------------------------------------------------------------------------------------------------------------------------------------------------------------------------------------------|--------------------------------------------------------------------------------------------------------------------------------------------------------------------------------------------------------------------|-----------------------|
| <b>b640</b> |      |  |  |  |  | SFLUB003 | PROMIS Sexual Lubrication ( Women only) | How often did you <l>maintain</l> your lubrication ("wetness") until completion of sexual activity or intercourse?                                                                                                                   | 0 = No sexual activity<br>5 = Almost always or always<br>4 = Most times (more than half the time)<br>3 = Sometimes (about half the time)<br>2 = A few times (less than half the time)<br>1 = Almost never or never | Over the past 4 weeks |
| <b>b640</b> | e115 |  |  |  |  | SFFAC107 | PROMIS Sexual Funx Interfering Factors  | How much has a medical device (for example, port, colostomy bag, or oxygen tank) affected your satisfaction with your sex life?                                                                                                      | 0= Have not had a medical device in the past 30 days<br>1=Not at all<br>2=A little bit<br>3=Somewhat<br>4=Quite a bit<br>5=Very much                                                                               | In the past 30 days   |
| <b>b640</b> | b670 |  |  |  |  | SFFAC109 | PROMIS Sexual Funx Interfering Factors  | How much has breast tenderness/enlargement affected your satisfaction with your sex life?                                                                                                                                            | 0= Have not had breast tenderness/enlargement in the past 30 days<br>1=Not at all<br>2=A little bit<br>3=Somewhat<br>4=Quite a bit<br>5=Very much                                                                  | In the past 30 days   |
| <b>b640</b> |      |  |  |  |  | SFSAT106 | PROMIS Sexual Satisfaction              | When you have had sexual activity, how satisfying has it been?                                                                                                                                                                       | 0= Have not had sexual activity in the past 30 days<br>1=Not at all<br>2=A little bit<br>3=Somewhat<br>4=Quite a bit<br>5=Very much                                                                                | In the past 30 days   |
| <b>b640</b> | b820 |  |  |  |  | SFFAC108 | PROMIS Sexual Funx Interfering Factors  | How much have scars from surgery affected your satisfaction with your sex life?                                                                                                                                                      | 0= Have not had surgery in the past 30 days<br>1=Not at all<br>2=A little bit<br>3=Somewhat<br>4=Quite a bit<br>5=Very much                                                                                        | In the past 30 days   |
| <b>b640</b> |      |  |  |  |  | SFEFN102 | PROMIS SexualFunx Erectile Men only     | How difficult has it been for you to get an erection when you wanted to? (If you use pills, injections, or a penis pump to help you get an erection, please answer this question thinking about the times that you used these aids.) | 0= Have not tried to get an erection in the past 30 days<br>5 = Not at all<br>4 = A little bit<br>3 = Somewhat<br>2 = Quite a bit<br>1 = Very                                                                      | In the past 30 days   |

|             |      |  |  |  |  |          |                                                    |                                                                                                   |                                                                                                                                                                                                                   |                       |
|-------------|------|--|--|--|--|----------|----------------------------------------------------|---------------------------------------------------------------------------------------------------|-------------------------------------------------------------------------------------------------------------------------------------------------------------------------------------------------------------------|-----------------------|
| <b>b640</b> |      |  |  |  |  | SFLUB001 | PROMIS Sexual Lubrication ( Women only)            | How <l>often</l> did you become lubricated ("wet") during sexual activity or intercourse?         | 0= No sexual activity<br>5 = Almost always or always<br>4 = Most times (more than half the time)<br>3 = Sometimes (about half the time)<br>2 = A few times (less than half the time)<br>1 = Almost never or never | Over the past 4 weeks |
| <b>b640</b> | b770 |  |  |  |  | SFSAT104 | PROMIS Sexual Satisfaction                         | How satisfied have you been with your sexual relationship with a partner?                         | 0=Have not had a partner in the past 30 days<br>1=Not at all<br>2=A little bit<br>3=Somewhat<br>4=Quite a bit<br>5=Very                                                                                           | In the past 30 days   |
| <b>b640</b> |      |  |  |  |  | SFLUB102 | PROMIS Sexual Lubrication ( Women only)            | How easily has your vagina become wet during sexual activity?                                     | 0=Have not had any sexual activity in the past 30 days<br>1 = Not at all<br>2 = A little bit<br>3 = Somewhat<br>4 = Quite a bit<br>5 = Very                                                                       | In the past 30 days   |
| <b>b640</b> | e115 |  |  |  |  | SFAID101 | PROMIS Sexual Function Therapeutic Aids women only | How often have you used personal lubricants (such as KY Jelly or Astroglide) for sexual activity? | 0=Have not had any sexual activity in the past 30 days<br>1=Never<br>2=Rarely<br>3=Sometimes<br>4=Often<br>5=Always                                                                                               | In the past 30 days   |
| <b>b640</b> | e115 |  |  |  |  | SFAID102 | PROMIS Sexual Function Therapeutic Aids women only | How often have you used vaginal moisturizers (such as Replens)?                                   | 0=Have not had any sexual activity in the past 30 days<br>1=Never<br>2=Rarely<br>3=Sometimes<br>4=Often<br>5=Always                                                                                               | In the past 30 days   |
| <b>b640</b> |      |  |  |  |  | SFLUB104 | PROMIS Sexual Lubrication ( Women only)            | How much has vaginal dryness affected your satisfaction with your sex life?                       | 0=Have not had any sexual activity in the past 30 days<br>5 = Not at all<br>4 = A little bit<br>3 = Somewhat<br>2 = Quite a bit<br>1 = Very much                                                                  | In the past 30 days   |

|             |      |      |  |  |  |          |                                         |                                                                                               |                                                                                                                                              |                     |
|-------------|------|------|--|--|--|----------|-----------------------------------------|-----------------------------------------------------------------------------------------------|----------------------------------------------------------------------------------------------------------------------------------------------|---------------------|
| <b>b640</b> |      |      |  |  |  | SFLUB103 | PROMIS Sexual Lubrication ( Women only) | How often have you had difficulty with sexual activity because your vagina was too dry?       | 0=Have not had any sexual activity in the past 30 days<br>5=Never<br>4=Rarely<br>3=Sometimes<br>2=Often<br>1=Always                          | In the past 30 days |
| <b>b640</b> | b130 | b455 |  |  |  | SFFAC101 | PROMIS Sexual Funx Interfering Factors  | How much has fatigue or lack of energy affected your satisfaction with your sex life?         | 0=Have not had fatigue or lack of energy in the past 30 days<br>1=Not at all<br>2=A little bit<br>3=Somewhat<br>4=Quite a bit<br>5=Very much | In the past 30 days |
| <b>b640</b> | b850 |      |  |  |  | SFFAC106 | PROMIS Sexual Funx Interfering Factors  | How much has hair loss from medical treatments affected your satisfaction with your sex life? | 0=Have not had hair loss in the past 30 days<br>1=Not at all<br>2=A little bit<br>3=Somewhat<br>4=Quite a bit<br>5=Very much                 | In the past 30 days |
| <b>b640</b> | b670 |      |  |  |  | SFFAC110 | PROMIS Sexual Funx Interfering Factors  | How much have hot flashes affected your satisfaction with your sex life?                      | 0=Have not had hot flashes in the past 30 days<br>1=Not at all<br>2=A little bit<br>3=Somewhat<br>4=Quite a bit<br>5=Very much               | In the past 30 days |
| <b>b640</b> |      |      |  |  |  | SFSAT105 | PROMIS Sexual Satisfaction              | When you have had sexual activity, how much have you enjoyed it?                              | 0=Have not had sexual activity in the past 30 days<br>1=Not at all<br>2=A little bit<br>3=Somewhat<br>4=Quite a bit<br>5=Very much           | In the past 30 days |
| <b>b640</b> | b530 |      |  |  |  | SFFAC105 | PROMIS Sexual Funx Interfering Factors  | How much has recent weight gain affected your satisfaction with your sex life?                | 0=Have not had weight gain in the past 30 days<br>1=Not at all<br>2=A little bit<br>3=Somewhat<br>4=Quite a bit<br>5=Very much               | In the past 30 days |

|      |      |  |  |  |  |          |                                         |                                                                                                                                                                                                                          |                                                                                                                                   |                     |
|------|------|--|--|--|--|----------|-----------------------------------------|--------------------------------------------------------------------------------------------------------------------------------------------------------------------------------------------------------------------------|-----------------------------------------------------------------------------------------------------------------------------------|---------------------|
| b640 | b530 |  |  |  |  | SFFAC104 | PROMIS Sexual Funx Interfering Factors  | How much has recent weight loss affected your satisfaction with your sex life?                                                                                                                                           | 0=Have not had weight loss in the past 30 days<br>1=Not at all<br>2=A little bit<br>3=Somewhat<br>4=Quite a bit<br>5=Very much    | In the past 30 days |
| b640 |      |  |  |  |  | SFORG150 | PROMIS Sexual Funx Orgasm Men only      | How often have you ejaculated ("come") more quickly than you would like?                                                                                                                                                 | 0=Have not tried to ejaculate in the past 30 days<br>5=Never<br>4=Rarely<br>3=Sometimes<br>2=Often<br>1=Always                    | In the past 30 days |
| b640 |      |  |  |  |  | SFORG151 | PROMIS Sexual Funx Orgasm Men only      | How often have you had pain and/or burning during or after ejaculation?                                                                                                                                                  | 0=Have not tried to ejaculate in the past 30 days<br>5=Never<br>4=Rarely<br>3=Sometimes<br>2=Often<br>1=Always                    | In the past 30 days |
| b640 |      |  |  |  |  | SFEFN101 | PROMIS Sexual Funx Erectile Men only    | How would you rate your ability to get and keep an erection? (If you use pills, injections, or a penis pump to help you get an erection, please answer this question thinking about the times that you used these aids.) | 0=Have not tried to get an erection in the past 30 days<br>5=Excellent<br>4=Very good<br>3=Good<br>2=Fair<br>1=Poor               | In the past 30 days |
| b640 |      |  |  |  |  | SFLUB101 | PROMIS Sexual Lubrication ( Women only) | How difficult has it been for your vagina to get lubricated ("wet") when you wanted it to?                                                                                                                               | 0=Have not tried to get lubricated in the past 30 days<br>5=Not at all<br>4=A little bit<br>3=Somewhat<br>2=Quite a bit<br>1=Very | In the past 30 days |
| b640 |      |  |  |  |  | SFORG101 | PROMIS Sexual Funx Orgasm Men only      | How would you rate your ability to have a satisfying orgasm/climax?                                                                                                                                                      | 0=Have not tried to have an orgasm/climax in the past 30 days<br>5=Excellent<br>4=Very good<br>3=Good<br>2=Fair<br>1=Poor         | In the past 30 days |

|             |      |  |  |  |  |           |                                     |                                                                                             |                                                                                                                                                                                                                                                                                   |                     |
|-------------|------|--|--|--|--|-----------|-------------------------------------|---------------------------------------------------------------------------------------------|-----------------------------------------------------------------------------------------------------------------------------------------------------------------------------------------------------------------------------------------------------------------------------------|---------------------|
| <b>b640</b> | e115 |  |  |  |  | SFACT110  | PROMIS Sexual Activity              | Does your sexual activity ever involve inserting a dildo or other sex toy into your vagina? | 0=No<br>1=Yes                                                                                                                                                                                                                                                                     |                     |
| <b>b640</b> |      |  |  |  |  | SFEFN004  | PROMIS SexualFunx Erectile Men only | How would you describe the FREQUENCY of your erections?                                     | 1 = I NEVER had an erection when I wanted one<br>2 = I had an erection LESS THAN HALF the time I wanted one<br>3 = I had an erection ABOUT HALF the time I wanted one<br>4 = I had an erection MORE THAN HALF the time I wanted one<br>5= I had an erection WHENEVER I wanted one |                     |
| <b>b640</b> |      |  |  |  |  | SFEFN003  | PROMIS SexualFunx Erectile Men only | How would you describe the usual QUALITY of your erections?                                 | 1 = None at all<br>2 = Not firm enough for any sexual activity<br>3 = Firm enough for masturbation and foreplay only<br>4 = Firm enough for intercourse                                                                                                                           |                     |
| <b>b640</b> | d770 |  |  |  |  | SFACT105a | PROMIS Sexual Activity              | How often have you touched someone's genitals with your hand romantically?                  | 1=Have not done in the past 30 days<br>2=Once<br>3=Two to three times<br>4=Four to five times<br>5=Six or more times                                                                                                                                                              | In the past 30 days |
| <b>b640</b> | d770 |  |  |  |  | SFACT106a | PROMIS Sexual Activity              | How often has someone touched your genitals with their hand romantically?                   | 1=Have not done in the past 30 days<br>2=Once<br>3=Two to three times<br>4=Four to five times<br>5=Six or more times                                                                                                                                                              | In the past 30 days |
| <b>b640</b> | d770 |  |  |  |  | SFACT107a | PROMIS Sexual Activity              | How often have you touched someone's genitals with your mouth (had oral sex)?               | 1=Have not done in the past 30 days<br>2=Once<br>3=Two to three times<br>4=Four to five times<br>5=Six or more times                                                                                                                                                              | In the past 30 days |



|             |      |  |  |  |  |           |                                    |                                                                                              |                                                                                                                                 |                     |
|-------------|------|--|--|--|--|-----------|------------------------------------|----------------------------------------------------------------------------------------------|---------------------------------------------------------------------------------------------------------------------------------|---------------------|
| <b>b640</b> | d770 |  |  |  |  | SFACT108a | PROMIS Sexual Activity             | How often has someone touched your genitals with their mouth (had oral sex)?                 | 1=Have not done in the past 30 days<br>2=Once<br>3=Two to three times<br>4=Four to five times<br>5=Six or more times            | In the past 30 days |
| <b>b640</b> | d770 |  |  |  |  | SFACT109a | PROMIS Sexual Activity             | How often have you had vaginal intercourse?                                                  | 1=Have not done in the past 30 days<br>2=Once<br>3=Two to three times<br>4=Four to five times<br>5=Six or more times            | In the past 30 days |
| <b>b640</b> |      |  |  |  |  | SFACT111a | PROMIS Sexual Activity             | How often have you masturbated?                                                              | 1=Have not done in the past 30 days<br>2=Once<br>3=Two to three times<br>4=Four to five times<br>5=Six or more times            | In the past 30 days |
| <b>b640</b> |      |  |  |  |  | SFACT112a | PROMIS Sexual Activity             | How often have you had anal sex?                                                             | 1=Have not done in the past 30 days<br>2=Once<br>3=Two to three times<br>4=Four to five times<br>5=Six or more times            | In the past 30 days |
| <b>b640</b> |      |  |  |  |  | SFACT112a | PROMIS Sexual Func Anal Discomfort | How often have you had anal sex?                                                             | 1=Have not done in the past 30 days<br>2=Once<br>3=Two to three times<br>4=Four to five times<br>5=Six or more times            | In the past 30 days |
| <b>b640</b> | d770 |  |  |  |  | SFACT101  | PROMIS Sexual Activity             | How often have you and another person spent time holding or hugging each other romantically? | 1=Have not done in the past 30 days<br>2=Once a week or less<br>3=Once every few days<br>4=Once a day<br>5=More than once a day | In the past 30 days |
| <b>b640</b> | d770 |  |  |  |  | SFACT102  | PROMIS Sexual Activity             | How often have you kissed another person romantically?                                       | 1=Have not done in the past 30 days<br>2=Once a week or less<br>3=Once every few days<br>4=Once a day<br>5=More than once a day | In the past 30 days |
| <b>b640</b> | d770 |  |  |  |  | SFACT103  | PROMIS Sexual Activity             | How often have you touched someone's breasts or chest with your hand romantically?           | 1=Have not done in the past 30 days<br>2=Once a week or less<br>3=Once every few days<br>4=Once a day<br>5=More than once a day | In the past 30 days |

|             |      |  |  |  |  |           |                        |                                                                                   |                                                                                                                                 |                     |
|-------------|------|--|--|--|--|-----------|------------------------|-----------------------------------------------------------------------------------|---------------------------------------------------------------------------------------------------------------------------------|---------------------|
| <b>b640</b> | d770 |  |  |  |  | SFACT104  | PROMIS Sexual Activity | How often has someone touched your breasts or chest with their hand romantically? | 1=Have not done in the past 30 days<br>2=Once a week or less<br>3=Once every few days<br>4=Once a day<br>5=More than once a day | In the past 30 days |
| <b>b640</b> | d770 |  |  |  |  | SFACT105b | PROMIS Sexual Activity | How often have you touched someone's genitals with your hand romantically?        | 1=Have not done in the past 30 days<br>2=Once a week or less<br>3=Once every few days<br>4=Once a day<br>5=More than once a day | In the past 30 days |
| <b>b640</b> | d770 |  |  |  |  | SFACT106b | PROMIS Sexual Activity | How often has someone touched your genitals with their hand romantically?         | 1=Have not done in the past 30 days<br>2=Once a week or less<br>3=Once every few days<br>4=Once a day<br>5=More than once a day | In the past 30 days |
| <b>b640</b> | d770 |  |  |  |  | SFACT107b | PROMIS Sexual Activity | How often have you touched someone's genitals with your mouth (had oral sex)?     | 1=Have not done in the past 30 days<br>2=Once a week or less<br>3=Once every few days<br>4=Once a day<br>5=More than once a day | In the past 30 days |
| <b>b640</b> | d770 |  |  |  |  | SFACT108b | PROMIS Sexual Activity | How often has someone touched your genitals with their mouth (had oral sex)?      | 1=Have not done in the past 30 days<br>2=Once a week or less<br>3=Once every few days<br>4=Once a day<br>5=More than once a day | In the past 30 days |
| <b>b640</b> | d770 |  |  |  |  | SFACT109b | PROMIS Sexual Activity | How often have you had vaginal intercourse?                                       | 1=Have not done in the past 30 days<br>2=Once a week or less<br>3=Once every few days<br>4=Once a day<br>5=More than once a day | In the past 30 days |
| <b>b640</b> |      |  |  |  |  | SFACT111b | PROMIS Sexual Activity | How often have you masturbated?                                                   | 1=Have not done in the past 30 days<br>2=Once a week or less<br>3=Once every few days<br>4=Once a day<br>5=More than once a day | In the past 30 days |
| <b>b640</b> |      |  |  |  |  | SFACT112b | PROMIS Sexual Activity | How often have you had anal sex?                                                  | 1=Have not done in the past 30 days<br>2=Once a week or less<br>3=Once every few days<br>4=Once a day<br>5=More than once a day | In the past 30 days |

|             |      |  |  |  |  |          |                                                    |                                                                                         |                                                            |                     |
|-------------|------|--|--|--|--|----------|----------------------------------------------------|-----------------------------------------------------------------------------------------|------------------------------------------------------------|---------------------|
| <b>b640</b> |      |  |  |  |  | SFINT102 | PROMIS Sexual Function Interest                    | How often have you felt like you wanted to have sex?                                    | 1=Never<br>2=Rarely<br>3=Sometimes<br>4=Often<br>5=Always  | In the past 30 days |
| <b>b640</b> |      |  |  |  |  | SFINT103 | PROMIS Sexual Function Interest                    | How often have you had sexual thoughts or fantasies while you were awake?               | 1=Never<br>2=Rarely<br>3=Sometimes<br>4=Often<br>5=Always  | In the past 30 days |
| <b>b640</b> |      |  |  |  |  | SFINT104 | PROMIS Sexual Function Interest                    | How often were you interested enough to start a sexual activity?                        | 1=Never<br>2=Rarely<br>3=Sometimes<br>4=Often<br>5=Always  | In the past 30 days |
| <b>b640</b> | e115 |  |  |  |  | SFAID105 | PROMIS Sexual Function Therapeutic Aids MEN only   | How often have you taken a pill such as Viagra, Cialis, or Levitra for sexual activity? | 1=Never<br>2=Rarely<br>3=Sometimes<br>4=Often<br>5=Always  | In the past 30 days |
| <b>b640</b> | e115 |  |  |  |  | SFAID107 | PROMIS Sexual Function Therapeutic Aids MEN only   | How often have you used an injection into your penis to get an erection?                | 1=Never<br>2=Rarely<br>3=Sometimes<br>4=Often<br>5=Always  | In the past 30 days |
| <b>b640</b> | e115 |  |  |  |  | SFAID108 | PROMIS Sexual Function Therapeutic Aids MEN only   | How often have you used a vacuum pump (penis pump) to get an erection?                  | 1=Never<br>2=Rarely<br>3=Sometimes<br>4=Often<br>5=Always  | In the past 30 days |
| <b>b640</b> |      |  |  |  |  | SFSAT103 | PROMIS Sexual Satisfaction                         | How often have you thought that your sex life is wonderful?                             | 1=Never<br>2=Rarely<br>3=Sometimes<br>4=Often<br>5=Always  | In the past 30 days |
| <b>b640</b> | e115 |  |  |  |  | SFAID104 | PROMIS Sexual Function Therapeutic Aids women only | Have you used a vaginal dilator?                                                        | 1=No<br>2=Yes<br>0=I am not sure what a vaginal dilator is | In the past 30 days |
| <b>b640</b> | e115 |  |  |  |  | SFAID109 | PROMIS Sexual Function Therapeutic Aids MEN only   | Have you had a penile implant?                                                          | 1=No<br>2=Yes<br>0=I am not sure what a penile implant is  |                     |
| <b>b640</b> | e115 |  |  |  |  | SFAID106 | PROMIS Sexual Function Therapeutic Aids MEN only   | Have you taken testosterone for sexual activity?                                        | 1=No<br>2=Yes<br>0=I don't know                            | In the past 30 days |

|      |      |  |  |  |  |          |                                                    |                                                                                                                                                                                          |                                                                                                                                                                                                                             |                                                                         |
|------|------|--|--|--|--|----------|----------------------------------------------------|------------------------------------------------------------------------------------------------------------------------------------------------------------------------------------------|-----------------------------------------------------------------------------------------------------------------------------------------------------------------------------------------------------------------------------|-------------------------------------------------------------------------|
| b640 | e115 |  |  |  |  | SFAID103 | PROMIS Sexual Function Therapeutic Aids women only | Have you used hormones (for example, estrogen, testosterone, or progesterone) for sexual activity either as a patch on your skin, or a cream, tablet, or ring inserted into your vagina? | 1=No<br>2=Yes<br>0=I don't know                                                                                                                                                                                             | In the past 30 days                                                     |
| b640 |      |  |  |  |  | SFSAT102 | PROMIS Sexual Satisfaction                         | How much pleasure has your sex life given you?                                                                                                                                           | 1=None<br>2=A little bit<br>3=Somewhat<br>4=Quite a bit<br>5=A lot                                                                                                                                                          | In the past 30 days                                                     |
| b640 |      |  |  |  |  | SFSAT101 | PROMIS Sexual Satisfaction                         | How satisfied have you been with your sex life?                                                                                                                                          | 1=Not at all<br>2=A little bit<br>3=Somewhat<br>4=Quite a bit<br>5=Very                                                                                                                                                     | In the past 30 days                                                     |
| b640 |      |  |  |  |  | SFINT101 | PROMIS Sexual Function Interest                    | How interested have you been in sexual activity?                                                                                                                                         | 1=Not at all<br>2=A little bit<br>3=Somewhat<br>4=Quite a bit<br>5=Very                                                                                                                                                     | In the past 30 days                                                     |
| b640 |      |  |  |  |  | SFSAT001 | PROMIS Sexual Satisfaction                         | I am satisfied with my sex life.                                                                                                                                                         | 1=Not at all<br>2=A little bit<br>3=Somewhat<br>4=Quite a bit<br>5=Very much                                                                                                                                                | During the past 7 days:                                                 |
| b640 |      |  |  |  |  | SFEFN002 | PROMIS SexualFunx Erectile Men only                | Your ability to have an erection                                                                                                                                                         | 1=Very poor<br>2=Poor<br>3=Fair<br>4=Good<br>5=Very good                                                                                                                                                                    | How would you rate the following during the LAST 4 WEEKS                |
| b640 |      |  |  |  |  | SFEFN001 | PROMIS SexualFunx Erectile Men only                | Difficulty getting or keeping an erection                                                                                                                                                | 4 = Not a Problem<br>3 = Little of a Problem<br>2 = Somewhat of a Problem<br>1 = Very much a Problem                                                                                                                        | How much of a problem was the following during the <U>past 4 weeks</U>: |
| b670 |      |  |  |  |  | SFVAG001 | PROMIS Sexual Function Vaginal Women only          | How <l>often</l> did you experience discomfort or pain <U>during</U> vaginal penetration?                                                                                                | 0 = Did not attempt intercourse<br>5 = Almost always or always<br>4 = Most times (more than half the time)<br>3 = Sometimes (about half the time)<br>2 = A few times (less than half the time)<br>1 = Almost never or never | Over the past 4 weeks                                                   |

|             |  |  |  |  |  |          |                                           |                                                                                                              |                                                                                                                                                                                                                             |                       |
|-------------|--|--|--|--|--|----------|-------------------------------------------|--------------------------------------------------------------------------------------------------------------|-----------------------------------------------------------------------------------------------------------------------------------------------------------------------------------------------------------------------------|-----------------------|
| <b>b670</b> |  |  |  |  |  | SFVAG002 | PROMIS Sexual Function Vaginal Women only | How <l>often</l> did you experience discomfort or pain <U>following</U> vaginal penetration?                 | 0 = Did not attempt intercourse<br>5 = Almost always or always<br>4 = Most times (more than half the time)<br>3 = Sometimes (about half the time)<br>2 = A few times (less than half the time)<br>1 = Almost never or never | Over the past 4 weeks |
| <b>b670</b> |  |  |  |  |  | SFVAG003 | PROMIS Sexual Function Vaginal Women only | How would you rate your <l>level</l> (degree) of discomfort or pain during or following vaginal penetration? | 0= Did not attempt intercourse<br>5 = Very high<br>4 = High<br>3 = Moderate<br>2 = Low<br>1 = Very low or none at all                                                                                                       | Over the past 4 weeks |
| <b>b670</b> |  |  |  |  |  | SFANA101 | PROMIS Sexual Func Anal Discomfort        | How often have you had discomfort or pain in your rectum during anal sex?                                    | 0=Have not had anal sex in the past 30 days<br>1=Never<br>2=Rarely<br>3=Sometimes<br>4=Often<br>5=Always                                                                                                                    | In the past 30 days   |
| <b>b670</b> |  |  |  |  |  | SFANA102 | PROMIS Sexual Func Anal Discomfort        | How often have you stopped having anal sex because of anal discomfort or pain?                               | 0=Have not had anal sex in the past 30 days<br>1=Never<br>2=Rarely<br>3=Sometimes<br>4=Often<br>5=Always                                                                                                                    | In the past 30 days   |
| <b>b670</b> |  |  |  |  |  | SFANA103 | PROMIS Sexual Func Anal Discomfort        | How often have you stopped having anal sex because of anal bleeding or irritation?                           | 0=Have not had anal sex in the past 30 days<br>1=Never<br>2=Rarely<br>3=Sometimes<br>4=Often<br>5=Always                                                                                                                    | In the past 30 days   |
| <b>b670</b> |  |  |  |  |  | SFVAG102 | PROMIS Sexual Function Vaginal Women only | How often have you had difficulty with sexual activity because of discomfort or pain in your vagina?         | 0=Have not had any sexual activity in the past 30 days<br>1=Never<br>2=Rarely<br>3=Sometimes<br>4=Often<br>5=Always                                                                                                         | In the past 30 days   |

|      |      |  |  |  |  |          |                                           |                                                                                                                           |                                                                                                                                                                      |                     |
|------|------|--|--|--|--|----------|-------------------------------------------|---------------------------------------------------------------------------------------------------------------------------|----------------------------------------------------------------------------------------------------------------------------------------------------------------------|---------------------|
| b670 |      |  |  |  |  | SFVAG103 | PROMIS Sexual Function Vaginal Women only | How often have you stopped sexual activity because of discomfort or pain in your vagina?                                  | 0=Have not had any sexual activity in the past 30 days<br>1=Never<br>2=Rarely<br>3=Sometimes<br>4=Often<br>5=Always                                                  | In the past 30 days |
| b670 |      |  |  |  |  | SFVAG104 | PROMIS Sexual Function Vaginal Women only | How often have you had difficulty with sexual activity because your vagina felt too tight?                                | 0=Have not had any sexual activity in the past 30 days<br>1=Never<br>2=Rarely<br>3=Sometimes<br>4=Often<br>5=Always                                                  | In the past 30 days |
| b670 |      |  |  |  |  | SFVAG105 | PROMIS Sexual Function Vaginal Women only | How often have you stopped sexual activity because of vaginal tightness?                                                  | 0=Have not had any sexual activity in the past 30 days<br>1=Never<br>2=Rarely<br>3=Sometimes<br>4=Often<br>5=Always                                                  | In the past 30 days |
| b670 |      |  |  |  |  | SFVAG106 | PROMIS Sexual Function Vaginal Women only | How often have you stopped sexual activity because of vaginal irritation or bleeding that was not because of your period? | 0=Have not had any sexual activity in the past 30 days<br>1=Never<br>2=Rarely<br>3=Sometimes<br>4=Often<br>5=Always                                                  | In the past 30 days |
| b670 |      |  |  |  |  | SFVAG107 | PROMIS Sexual Function Vaginal Women only | How often have you had irritation or bleeding in your vagina after sexual activity that was not because of your period?   | 0=Have not had any sexual activity in the past 30 days<br>1=Never<br>2=Rarely<br>3=Sometimes<br>4=Often<br>5=Always                                                  | In the past 30 days |
| b670 |      |  |  |  |  | SFVAG101 | PROMIS Sexual Function Vaginal Women only | How would you describe the comfort of your vagina during sexual activity?                                                 | 0=Have not had any sexual activity in the past 30 days<br>1=Very comfortable<br>2=Comfortable<br>3=Uncomfortable<br>4=Very uncomfortable<br>5=Not comfortable at all | In the past 30 days |
| b670 | b280 |  |  |  |  | SFFAC102 | PROMIS Sexual Funx Interfering Factors    | How much has pain affected your satisfaction with your sex life?                                                          | 0=Have not had pain in the past 30 days<br>1=Not at all<br>2=A little bit<br>3=Somewhat<br>4=Quite a bit<br>5=Very much                                              | In the past 30 days |

|             |      |  |  |  |      |          |                                                                                                          |                                                                                                                            |                                                                                                                                                                         |                                                                                                                                                                                                                                        |
|-------------|------|--|--|--|------|----------|----------------------------------------------------------------------------------------------------------|----------------------------------------------------------------------------------------------------------------------------|-------------------------------------------------------------------------------------------------------------------------------------------------------------------------|----------------------------------------------------------------------------------------------------------------------------------------------------------------------------------------------------------------------------------------|
| <b>b670</b> | b280 |  |  |  |      | SFFAC103 | PROMIS Sexual Funx Interfering Factors                                                                   | How much pain have you had during sexual activity?                                                                         | 88=Have not had any sexual activity in the past 30 days<br>0=0 No Pain<br>1=1<br>2=2<br>3=3<br>4=4<br>5=5<br>6=6<br>7=7<br>8=8<br>9=9<br>10=10 Pain as bad as it can be | In the past 30 days                                                                                                                                                                                                                    |
| <b>b670</b> |      |  |  |  |      | SFANA104 | 0=Have not had anal sex in the past 30 days<br>1=Never<br>2=Rarely<br>3=Sometimes<br>4=Often<br>5=Always |                                                                                                                            | How often have you had bleeding or irritation in your rectum after anal sex?                                                                                            | In the past 30 days                                                                                                                                                                                                                    |
| <b>b720</b> | b126 |  |  |  |      | UCLA7x2  | PROMIS Isolation                                                                                         | I feel that I am no longer close to anyone                                                                                 | 1=Never<br>2=Rarely<br>3=Sometimes<br>4=Usually<br>5=Always                                                                                                             |                                                                                                                                                                                                                                        |
| <b>c3</b>   |      |  |  |  |      | II24     | PROMIS Illness Impact (Neg)                                                                              | I am willing to express my emotions<br>How true was this before your illness?<br>How true is this now, since your illness? | 1=Not at all<br>2=A little bit<br>3=Somewhat<br>4=Quite a bit<br>5=Very much                                                                                            | <u>Thinking about how your illness has affected you</u>, please rate how true this statement was of you <u>before your illness</u>, and again now, <u>since your illness</u>.                                                          |
| <b>d170</b> | d440 |  |  |  | PERF | PFA43    | PROMIS PhysFuncMobility-Aids                                                                             | Are you able to write with a pen or pencil?                                                                                |                                                                                                                                                                         | The following questions ask about your ability to stand and move with and without support. "Support" means using items such as canes, walking sticks walkers and leg braces, or other people. Can you stand (with or without support)? |

|      |    |  |  |  |  |            |                                      |                                                                             |                                                                                                                                    |                         |
|------|----|--|--|--|--|------------|--------------------------------------|-----------------------------------------------------------------------------|------------------------------------------------------------------------------------------------------------------------------------|-------------------------|
| d220 |    |  |  |  |  | PC-CaPS25  | PROMIS Applied Cog Gen Concerns      | I have had difficulty multi-tasking                                         | 1=Never<br>2=Rarely (Once)<br>3=Sometimes (Two or three times)<br>4=Often (About once a day)<br>5=Very often (Several times a day) | In the past 7 days      |
| d220 |    |  |  |  |  | PC-CaPS24  | PROMIS Applied Cog Gen Concerns      | I have been able to multi-task as easily as usual without extra effort      | 1=Not at all<br>2=A little bit<br>3=Somewhat<br>4=Quite a bit<br>5=Very much                                                       | In the past 7 days      |
| d230 |    |  |  |  |  | SRPSAT38r1 | PROMIS Satis w SocialRolesActivities | I am satisfied with the amount of time I spend performing my daily routines | 1=Not at all<br>2=A little bit<br>3=Somewhat<br>4=Quite a bit<br>5=Very much                                                       |                         |
| d230 |    |  |  |  |  | SRPSAT49r1 | PROMIS Satis w SocialRolesActivities | I am satisfied with my ability to perform my daily routines                 | 1=Not at all<br>2=A little bit<br>3=Somewhat<br>4=Quite a bit<br>5=Very much                                                       |                         |
| d230 | e3 |  |  |  |  | An14       | PROMIS Bank v1.0 - Fatigue ?         | I need help doing my usual activities                                       | Not at all<br>A little bit<br>Somewhat<br>Quite a bit<br>Very much                                                                 | During the past 7 days: |
| d230 |    |  |  |  |  | An7        | PROMIS Bank v1.0 - Fatigue ?         | I am able to do my usual activities                                         | Not at all<br>A little bit<br>Somewhat<br>Quite a bit<br>Very much                                                                 | During the past 7 days: |
| d230 |    |  |  |  |  | SRPSAT38   | PROMIS Bank v1.0 - Social Sat Role   | I am satisfied with the amount of time I spend performing my daily routines | Not at all<br>A little bit<br>Somewhat<br>Quite a bit<br>Very much                                                                 | In the past 7 days      |
| d230 |    |  |  |  |  | SRPSAT49   | PROMIS Bank v1.0 - Social Sat Role   | I am satisfied with my ability to perform my daily routines                 | Not at all<br>A little bit<br>Somewhat<br>Quite a bit<br>Very much                                                                 | In the past 7 days      |



|      |  |  |  |  |  |            |                                      |                                                                                                                                   |                                                                              |                                                                                                                                                                               |
|------|--|--|--|--|--|------------|--------------------------------------|-----------------------------------------------------------------------------------------------------------------------------------|------------------------------------------------------------------------------|-------------------------------------------------------------------------------------------------------------------------------------------------------------------------------|
| d240 |  |  |  |  |  | II3        | PROMIS Illness Impact (Neg)          | I believe I can handle problems<br>How true was this before your illness?<br>How true is this now, since your illness?            | 1=Not at all<br>2=A little bit<br>3=Somewhat<br>4=Quite a bit<br>5=Very much | <u>Thinking about how your illness has affected you</u>, please rate how true this statement was of you <u>before your illness</u>, and again now, <u>since your illness</u>. |
| d240 |  |  |  |  |  | II8        | PROMIS Illness Impact (Neg)          | I can keep going when problems arise<br>How true was this before your illness?<br>How true is this now, since your illness?       | 1=Not at all<br>2=A little bit<br>3=Somewhat<br>4=Quite a bit<br>5=Very much | <u>Thinking about how your illness has affected you</u>, please rate how true this statement was of you <u>before your illness</u>, and again now, <u>since your illness</u>. |
| d240 |  |  |  |  |  | II9        | PROMIS Illness Impact (Neg)          | I can handle most anything<br>How true was this before your illness?<br>How true is this now, since your illness?                 | 1=Not at all<br>2=A little bit<br>3=Somewhat<br>4=Quite a bit<br>5=Very much | <u>Thinking about how your illness has affected you</u>, please rate how true this statement was of you <u>before your illness</u>, and again now, <u>since your illness</u>. |
| d240 |  |  |  |  |  | II26       | PROMIS Illness Impact (Neg)          | I can deal with uncertainty<br>How true was this before your illness?<br>How true is this now, since your illness?                | 1=Not at all<br>2=A little bit<br>3=Somewhat<br>4=Quite a bit<br>5=Very much | <u>Thinking about how your illness has affected you</u>, please rate how true this statement was of you <u>before your illness</u>, and again now, <u>since your illness</u>. |
| d240 |  |  |  |  |  | II29       | PROMIS Illness Impact (Neg)          | I am able to deal with stress and problems<br>How true was this before your illness?<br>How true is this now, since your illness? | 1=Not at all<br>2=A little bit<br>3=Somewhat<br>4=Quite a bit<br>5=Very much | <u>Thinking about how your illness has affected you</u>, please rate how true this statement was of you <u>before your illness</u>, and again now, <u>since your illness</u>. |
| d3   |  |  |  |  |  | SRPSAT43_0 | PROMIS Satis w SocialRolesActivities | I am satisfied with my ability to keep in touch with others                                                                       | 1=Not at all<br>2=A little bit<br>3=Somewhat<br>4=Quite a bit<br>5=Very much |                                                                                                                                                                               |

|              |      |    |    |    |      |       |                                            |                                                                                               |                                                                                                                     |                                                                                                                                                                                                                                        |
|--------------|------|----|----|----|------|-------|--------------------------------------------|-----------------------------------------------------------------------------------------------|---------------------------------------------------------------------------------------------------------------------|----------------------------------------------------------------------------------------------------------------------------------------------------------------------------------------------------------------------------------------|
| <b>d3601</b> | d440 |    |    |    | PERF | PF_41 | PROMIS<br>PhysFuncMobility-<br>Aids        | Are you able to type a few sentences on a computer keyboard?                                  |                                                                                                                     | The following questions ask about your ability to stand and move with and without support. "Support" means using items such as canes, walking sticks walkers and leg braces, or other people. Can you stand (with or without support)? |
| <b>d3601</b> | d440 |    |    |    | PERF | PF_43 | PROMIS<br>PhysFuncMobility-<br>Aids        | Are you able to use a regular computer mouse?                                                 |                                                                                                                     | The following questions ask about your ability to stand and move with and without support. "Support" means using items such as canes, walking sticks walkers and leg braces, or other people. Can you stand (with or without support)? |
| <b>d4</b>    | d5   | d6 |    |    |      | PFB50 | PROMIS Bank<br>v1.0 - Physical<br>Function | How much difficulty do you have doing your daily physical activities, because of your health? | No difficulty at all<br>A little bit of difficulty<br>Some difficulty<br>A lot of difficulty<br>Can't do because of |                                                                                                                                                                                                                                        |
| <b>d4</b>    | d5   | d6 | d7 | d8 | d9   | PFC47 | PROMIS Bank<br>v1.0 - Physical<br>Function | Are you able to be out of bed most of the day?                                                | Without any difficulty<br>With a little difficulty<br>With some difficulty<br>With much difficulty<br>Unable to do  |                                                                                                                                                                                                                                        |
| <b>d410</b>  |      |    |    |    |      | PFA3  | PROMIS Bank<br>v1.0 - Physical<br>Function | Does your health now limit you in bending, kneeling, or stooping?                             | Not at all<br>Very little<br>Somewhat<br>Quite a lot<br>Cannot do                                                   |                                                                                                                                                                                                                                        |
| <b>d410</b>  |      |    |    |    |      | PFC54 | PROMIS Bank<br>v1.0 - Physical<br>Function | Does your health now limit you in getting in and out of the bathtub?                          | Not at all<br>Very little<br>Somewhat<br>Quite a lot<br>Cannot do                                                   |                                                                                                                                                                                                                                        |
| <b>d410</b>  | d640 |    |    |    |      | PFA9  | PROMIS Bank<br>v1.0 - Physical<br>Function | Are you able to bend down and pick up clothing from the floor?                                | Without any difficulty<br>With a little difficulty<br>With some difficulty<br>With much difficulty<br>Unable to do  |                                                                                                                                                                                                                                        |

|             |  |  |  |  |  |       |                                      |                                                                            |                                                                                                                    |  |
|-------------|--|--|--|--|--|-------|--------------------------------------|----------------------------------------------------------------------------|--------------------------------------------------------------------------------------------------------------------|--|
| <b>d410</b> |  |  |  |  |  | PFA15 | PROMIS Bank v1.0 - Physical Function | Are you able to stand up from an armless straight chair?                   | Without any difficulty<br>With a little difficulty<br>With some difficulty<br>With much difficulty<br>Unable to do |  |
| <b>d410</b> |  |  |  |  |  | PFA31 | PROMIS Bank v1.0 - Physical Function | Are you able to get up off the floor from lying on your back without help? | Without any difficulty<br>With a little difficulty<br>With some difficulty<br>With much difficulty<br>Unable to do |  |
| <b>d410</b> |  |  |  |  |  | PFA41 | PROMIS Bank v1.0 - Physical Function | Are you able to squat and get up?                                          | Without any difficulty<br>With a little difficulty<br>With some difficulty<br>With much difficulty<br>Unable to do |  |
| <b>d410</b> |  |  |  |  |  | PFA45 | PROMIS Bank v1.0 - Physical Function | Are you able to get out of bed into a chair?                               | Without any difficulty<br>With a little difficulty<br>With some difficulty<br>With much difficulty<br>Unable to do |  |
| <b>d410</b> |  |  |  |  |  | PFA56 | PROMIS Bank v1.0 - Physical Function | Are you able to get in and out of a car?                                   | Without any difficulty<br>With a little difficulty<br>With some difficulty<br>With much difficulty<br>Unable to do |  |
| <b>d410</b> |  |  |  |  |  | PFB40 | PROMIS Bank v1.0 - Physical Function | Are you able to stand up on tiptoes?                                       | Without any difficulty<br>With a little difficulty<br>With some difficulty<br>With much difficulty<br>Unable to do |  |
| <b>d410</b> |  |  |  |  |  | PFC40 | PROMIS Bank v1.0 - Physical Function | Are you able to kneel on the floor?                                        | Without any difficulty<br>With a little difficulty<br>With some difficulty<br>With much difficulty<br>Unable to do |  |
| <b>d410</b> |  |  |  |  |  | PFC41 | PROMIS Bank v1.0 - Physical Function | Are you able to sit down in and stand up from a low, soft couch?           | Without any difficulty<br>With a little difficulty<br>With some difficulty<br>With much difficulty<br>Unable to do |  |
| <b>d410</b> |  |  |  |  |  | PFC45 | PROMIS Bank v1.0 - Physical Function | Are you able to get on and off the toilet?                                 | Without any difficulty<br>With a little difficulty<br>With some difficulty<br>With much difficulty<br>Unable to do |  |

|             |       |       |  |  |      |       |                                      |                                                                               |                                                                                                                    |                                                                                                                                                                                                                                        |
|-------------|-------|-------|--|--|------|-------|--------------------------------------|-------------------------------------------------------------------------------|--------------------------------------------------------------------------------------------------------------------|----------------------------------------------------------------------------------------------------------------------------------------------------------------------------------------------------------------------------------------|
| <b>d410</b> |       |       |  |  |      | PFC52 | PROMIS Bank v1.0 - Physical Function | Are you able to turn from side to side in bed?                                | Without any difficulty<br>With a little difficulty<br>With some difficulty<br>With much difficulty<br>Unable to do |                                                                                                                                                                                                                                        |
| <b>d410</b> |       |       |  |  |      | PFC53 | PROMIS Bank v1.0 - Physical Function | Are you able to get in and out of bed?                                        | Without any difficulty<br>With a little difficulty<br>With some difficulty<br>With much difficulty<br>Unable to do |                                                                                                                                                                                                                                        |
| <b>d410</b> |       |       |  |  |      | PF_52 | PROMIS PhysFuncMobility-Aids         | How much difficulty do you currently have standing up from a low, soft couch? |                                                                                                                    | The following questions ask about your ability to stand and move with and without support. "Support" means using items such as canes, walking sticks walkers and leg braces, or other people. Can you stand (with or without support)? |
| <b>d410</b> | d4105 | d6402 |  |  | PERF | PFA9  | PROMIS PhysFuncMobility-Aids         | Are you able to bend down and pick up clothing from the floor?                |                                                                                                                    | The following questions ask about your ability to stand and move with and without support. "Support" means using items such as canes, walking sticks walkers and leg braces, or other people. Can you stand (with or without support)? |
| <b>d410</b> | d4103 |       |  |  | PERF | PFC53 | PROMIS PhysFuncMobility-Aids         | Are you able to get in and out of bed?                                        |                                                                                                                    | The following questions ask about your ability to stand and move with and without support. "Support" means using items such as canes, walking sticks walkers and leg braces, or other people. Can you stand (with or without support)? |

|              |       |  |  |  |      |       |                                     |                                                                            |  |                                                                                                                                                                                                                                        |
|--------------|-------|--|--|--|------|-------|-------------------------------------|----------------------------------------------------------------------------|--|----------------------------------------------------------------------------------------------------------------------------------------------------------------------------------------------------------------------------------------|
| <b>d410</b>  | d4103 |  |  |  | PERF | PFC45 | PROMIS<br>PhysFuncMobility-<br>Aids | Are you able to get on and off the toilet?                                 |  | The following questions ask about your ability to stand and move with and without support. "Support" means using items such as canes, walking sticks walkers and leg braces, or other people. Can you stand (with or without support)? |
| <b>d410</b>  | d4103 |  |  |  | PERF | PFC47 | PROMIS<br>PhysFuncMobility-<br>Aids | Are you able to be out of bed most of the day?                             |  | The following questions ask about your ability to stand and move with and without support. "Support" means using items such as canes, walking sticks walkers and leg braces, or other people. Can you stand (with or without support)? |
| <b>d4100</b> |       |  |  |  | PERF | PFA31 | PROMIS<br>PhysFuncMobility-<br>Aids | Are you able to get up off the floor from lying on your back without help? |  | The following questions ask about your ability to stand and move with and without support. "Support" means using items such as canes, walking sticks walkers and leg braces, or other people. Can you stand (with or without support)? |
| <b>d4101</b> |       |  |  |  |      | PFA41 | PROMIS<br>PhysFuncMobility-<br>Aids | Are you able to squat and get up?                                          |  | The following questions ask about your ability to stand and move with and without support. "Support" means using items such as canes, walking sticks walkers and leg braces, or other people. Can you stand (with or without support)? |

|              |       |  |  |  |      |          |                                     |                                                                              |  |                                                                                                                                                                                                                                        |
|--------------|-------|--|--|--|------|----------|-------------------------------------|------------------------------------------------------------------------------|--|----------------------------------------------------------------------------------------------------------------------------------------------------------------------------------------------------------------------------------------|
| <b>d4102</b> |       |  |  |  | PERF | PFC40    | PROMIS<br>PhysFuncMobility-<br>Aids | Are you able to kneel on the floor?                                          |  | The following questions ask about your ability to stand and move with and without support. "Support" means using items such as canes, walking sticks walkers and leg braces, or other people. Can you stand (with or without support)? |
| <b>d4102</b> | d4152 |  |  |  | PERF | PFC40_PF | PROMIS<br>PhysFuncMobility-<br>Aids | Are you able to kneel on the floor?                                          |  | The following questions ask about your ability to stand and move with and without support. "Support" means using items such as canes, walking sticks walkers and leg braces, or other people. Can you stand (with or without support)? |
| <b>d4103</b> |       |  |  |  | PERF | PF_51    | PROMIS<br>PhysFuncMobility-<br>Aids | How much difficulty do you currently have sitting down on a low, soft couch? |  | The following questions ask about your ability to stand and move with and without support. "Support" means using items such as canes, walking sticks walkers and leg braces, or other people. Can you stand (with or without support)? |
| <b>d4103</b> |       |  |  |  | PERF | PF_54    | PROMIS<br>PhysFuncMobility-<br>Aids | Are you able to transfer from a bed to a chair or a wheelchair?              |  | The following questions ask about your ability to stand and move with and without support. "Support" means using items such as canes, walking sticks walkers and leg braces, or other people. Can you stand (with or without support)? |

|              |       |  |  |  |      |       |                                            |                                                            |                                                                                                                    |                                                                                                                                                                                                                                        |
|--------------|-------|--|--|--|------|-------|--------------------------------------------|------------------------------------------------------------|--------------------------------------------------------------------------------------------------------------------|----------------------------------------------------------------------------------------------------------------------------------------------------------------------------------------------------------------------------------------|
| <b>d4103</b> | d4701 |  |  |  | PERF | PF_61 | PROMIS<br>PhysFuncMobility-<br>Aids        | Are you able to get into a vehicle?                        |                                                                                                                    | The following questions ask about your ability to stand and move with and without support. "Support" means using items such as canes, walking sticks walkers and leg braces, or other people. Can you stand (with or without support)? |
| <b>d4103</b> |       |  |  |  | PERF | PFA45 | PROMIS<br>PhysFuncMobility-<br>Aids        | Are you able to get out of bed into a chair?               |                                                                                                                    | The following questions ask about your ability to stand and move with and without support. "Support" means using items such as canes, walking sticks walkers and leg braces, or other people. Can you stand (with or without support)? |
| <b>d4103</b> | d470  |  |  |  | PERF | PFA56 | PROMIS<br>PhysFuncMobility-<br>Aids        | Are you able to get in and out of a car?                   |                                                                                                                    | The following questions ask about your ability to stand and move with and without support. "Support" means using items such as canes, walking sticks walkers and leg braces, or other people. Can you stand (with or without support)? |
| <b>d4105</b> | b710  |  |  |  |      | PFA49 | PROMIS Bank<br>v1.0 - Physical<br>Function | Are you able to bend or twist your back?                   | Without any difficulty<br>With a little difficulty<br>With some difficulty<br>With much difficulty<br>Unable to do |                                                                                                                                                                                                                                        |
| <b>d4106</b> |       |  |  |  | PERF | PF_14 | PROMIS<br>PhysFuncMobility-<br>Aids        | Are you able to roll onto your stomach while lying in bed? |                                                                                                                    | The following questions ask about your ability to stand and move with and without support. "Support" means using items such as canes, walking sticks walkers and leg braces, or other people. Can you stand (with or without support)? |

|       |      |  |  |  |      |       |                                      |                                                                        |                                                                                                                    |                                                                                                                                                                                                                                        |
|-------|------|--|--|--|------|-------|--------------------------------------|------------------------------------------------------------------------|--------------------------------------------------------------------------------------------------------------------|----------------------------------------------------------------------------------------------------------------------------------------------------------------------------------------------------------------------------------------|
| d415  | b710 |  |  |  |      | PFA32 | PROMIS Bank v1.0 - Physical Function | Are you able to stand with your knees straight?                        | Without any difficulty<br>With a little difficulty<br>With some difficulty<br>With much difficulty<br>Unable to do |                                                                                                                                                                                                                                        |
| d415  |      |  |  |  |      | PFA10 | PROMIS Bank v1.0 - Physical Function | Are you able to stand for one hour?                                    | Without any difficulty<br>With a little difficulty<br>With some difficulty<br>With much difficulty<br>Unable to do |                                                                                                                                                                                                                                        |
| d415  |      |  |  |  |      | PFA37 | PROMIS Bank v1.0 - Physical Function | Are you able to stand for short periods of time?                       | Without any difficulty<br>With a little difficulty<br>With some difficulty<br>With much difficulty<br>Unable to do |                                                                                                                                                                                                                                        |
| d415  |      |  |  |  |      | PFA51 | PROMIS Bank v1.0 - Physical Function | Are you able to sit on the edge of a bed?                              | Without any difficulty<br>With a little difficulty<br>With some difficulty<br>With much difficulty<br>Unable to do |                                                                                                                                                                                                                                        |
| d415  |      |  |  |  |      | PFB32 | PROMIS Bank v1.0 - Physical Function | Are you able to stand unsupported for 10 minutes?                      | Without any difficulty<br>With a little difficulty<br>With some difficulty<br>With much difficulty<br>Unable to do |                                                                                                                                                                                                                                        |
| d415  |      |  |  |  |      | PFB42 | PROMIS Bank v1.0 - Physical Function | Are you able to stand unsupported for 30 minutes?                      | Without any difficulty<br>With a little difficulty<br>With some difficulty<br>With much difficulty<br>Unable to do |                                                                                                                                                                                                                                        |
| d415  |      |  |  |  |      | PFC39 | PROMIS Bank v1.0 - Physical Function | Are you able to stand without losing your balance for several minutes? | Without any difficulty<br>With a little difficulty<br>With some difficulty<br>With much difficulty<br>Unable to do |                                                                                                                                                                                                                                        |
| d4153 |      |  |  |  | PERF | PFA51 | PROMIS PhysFuncMobility-Aids         | Are you able to sit on the edge of a bed?                              |                                                                                                                    | The following questions ask about your ability to stand and move with and without support. "Support" means using items such as canes, walking sticks walkers and leg braces, or other people. Can you stand (with or without support)? |



|              |      |  |  |  |      |       |                                            |                                                          |                                                                                                                    |                                                                                                                                                                                                                                        |
|--------------|------|--|--|--|------|-------|--------------------------------------------|----------------------------------------------------------|--------------------------------------------------------------------------------------------------------------------|----------------------------------------------------------------------------------------------------------------------------------------------------------------------------------------------------------------------------------------|
| <b>d4154</b> |      |  |  |  |      | PF_53 | PROMIS<br>PhysFuncMobility-<br>Aids        | Are you able to stand upright briefly without support?   |                                                                                                                    | The following questions ask about your ability to stand and move with and without support. "Support" means using items such as canes, walking sticks walkers and leg braces, or other people. Can you stand (with or without support)? |
| <b>d4154</b> | b740 |  |  |  |      | PFA10 | PROMIS<br>PhysFuncMobility-<br>Aids        | Are you able to stand for one hour?                      |                                                                                                                    | The following questions ask about your ability to stand and move with and without support. "Support" means using items such as canes, walking sticks walkers and leg braces, or other people. Can you stand (with or without support)? |
| <b>d4154</b> |      |  |  |  |      | PFA37 | PROMIS<br>PhysFuncMobility-<br>Aids        | Are you able to stand for short periods of time?         |                                                                                                                    | The following questions ask about your ability to stand and move with and without support. "Support" means using items such as canes, walking sticks walkers and leg braces, or other people. Can you stand (with or without support)? |
| <b>d4154</b> |      |  |  |  | PERF | PFB32 | PROMIS<br>PhysFuncMobility-<br>Aids        | Are you able to stand unsupported for 10 minutes?        |                                                                                                                    | The following questions ask about your ability to stand and move with and without support. "Support" means using items such as canes, walking sticks walkers and leg braces, or other people. Can you stand (with or without support)? |
| <b>d420</b>  |      |  |  |  |      | PFC46 | PROMIS Bank<br>v1.0 - Physical<br>Function | Are you able to transfer from a bed to a chair and back? | Without any difficulty<br>With a little difficulty<br>With some difficulty<br>With much difficulty<br>Unable to do |                                                                                                                                                                                                                                        |

|             |      |      |      |  |      |       |                                      |                                                                  |                                                                                                                    |                                                                                                                                                                                                                                        |
|-------------|------|------|------|--|------|-------|--------------------------------------|------------------------------------------------------------------|--------------------------------------------------------------------------------------------------------------------|----------------------------------------------------------------------------------------------------------------------------------------------------------------------------------------------------------------------------------------|
| <b>d430</b> | d620 |      |      |  |      | PFA5  | PROMIS Bank v1.0 - Physical Function | Does your health now limit you in lifting or carrying groceries? | Not at all<br>Very little<br>Somewhat<br>Quite a lot<br>Cannot do                                                  |                                                                                                                                                                                                                                        |
| <b>d430</b> | b455 | b730 |      |  |      | PFB8  | PROMIS Bank v1.0 - Physical Function | Are you able to carry two bags filled with groceries 100 yards?  | Without any difficulty<br>With a little difficulty<br>With some difficulty<br>With much difficulty<br>Unable to do |                                                                                                                                                                                                                                        |
| <b>d430</b> | b730 |      |      |  |      | PFA14 | PROMIS Bank v1.0 - Physical Function | Are you able to carry a heavy object (over 10 pounds)?           | Without any difficulty<br>With a little difficulty<br>With some difficulty<br>With much difficulty<br>Unable to do |                                                                                                                                                                                                                                        |
| <b>d430</b> | d455 | d640 | d460 |  |      | PFA42 | PROMIS Bank v1.0 - Physical Function | Are you able to carry a laundry basket up a flight of stairs?    | Without any difficulty<br>With a little difficulty<br>With some difficulty<br>With much difficulty<br>Unable to do |                                                                                                                                                                                                                                        |
| <b>d430</b> |      |      |      |  |      | PFA8  | PROMIS Bank v1.0 - Physical Function | Are you able to move a chair from one room to another?           | Without any difficulty<br>With a little difficulty<br>With some difficulty<br>With much difficulty<br>Unable to do |                                                                                                                                                                                                                                        |
| <b>d430</b> |      |      |      |  |      | PFB13 | PROMIS Bank v1.0 - Physical Function | Are you able to carry a shopping bag or briefcase?               | Without any difficulty<br>With a little difficulty<br>With some difficulty<br>With much difficulty<br>Unable to do |                                                                                                                                                                                                                                        |
| <b>d430</b> |      |      |      |  | PERF | PF_24 | PROMIS PhysFuncMobility-Aids         | Are you able to carry a bag of groceries for a short distance?   |                                                                                                                    | The following questions ask about your ability to stand and move with and without support. "Support" means using items such as canes, walking sticks walkers and leg braces, or other people. Can you stand (with or without support)? |

|             |       |      |      |  |      |       |                                     |                                                                 |  |                                                                                                                                                                                                                                        |
|-------------|-------|------|------|--|------|-------|-------------------------------------|-----------------------------------------------------------------|--|----------------------------------------------------------------------------------------------------------------------------------------------------------------------------------------------------------------------------------------|
| <b>d430</b> |       |      |      |  | PERF | PF_48 | PROMIS<br>PhysFuncMobility-<br>Aids | Are you able to carry a shopping bag?                           |  | The following questions ask about your ability to stand and move with and without support. "Support" means using items such as canes, walking sticks walkers and leg braces, or other people. Can you stand (with or without support)? |
| <b>d430</b> | d4301 |      |      |  | PERF | PFA8  | PROMIS<br>PhysFuncMobility-<br>Aids | Are you able to move a chair from one room to another?          |  | The following questions ask about your ability to stand and move with and without support. "Support" means using items such as canes, walking sticks walkers and leg braces, or other people. Can you stand (with or without support)? |
| <b>d430</b> |       |      |      |  | PERF | PFA14 | PROMIS<br>PhysFuncMobility-<br>Aids | Are you able to carry a heavy object (over 10 pounds)?          |  | The following questions ask about your ability to stand and move with and without support. "Support" means using items such as canes, walking sticks walkers and leg braces, or other people. Can you stand (with or without support)? |
| <b>d430</b> | b455  | b730 | b740 |  | PERF | PFB8  | PROMIS<br>PhysFuncMobility-<br>Aids | Are you able to carry two bags filled with groceries 100 yards? |  | The following questions ask about your ability to stand and move with and without support. "Support" means using items such as canes, walking sticks walkers and leg braces, or other people. Can you stand (with or without support)? |

|              |       |      |  |  |      |       |                                            |                                                                                            |                                                                                                                    |                                                                                                                                                                                                                                        |
|--------------|-------|------|--|--|------|-------|--------------------------------------------|--------------------------------------------------------------------------------------------|--------------------------------------------------------------------------------------------------------------------|----------------------------------------------------------------------------------------------------------------------------------------------------------------------------------------------------------------------------------------|
| <b>d4300</b> |       |      |  |  | PERF | PF_22 | PROMIS<br>PhysFuncMobility-<br>Aids        | Are you able to lift small objects (such as a can of soup) above your shoulder?            |                                                                                                                    | The following questions ask about your ability to stand and move with and without support. "Support" means using items such as canes, walking sticks walkers and leg braces, or other people. Can you stand (with or without support)? |
| <b>d4302</b> | d4551 | b730 |  |  |      | PFA42 | PROMIS<br>PhysFuncMobility-<br>Aids        | Are you able to carry a laundry basket up a flight of stairs?                              |                                                                                                                    | The following questions ask about your ability to stand and move with and without support. "Support" means using items such as canes, walking sticks walkers and leg braces, or other people. Can you stand (with or without support)? |
| <b>d4305</b> |       |      |  |  | PERF | PF_23 | PROMIS<br>PhysFuncMobility-<br>Aids        | Are you able to reach and get down an object (such as a can of soup) from above your head? |                                                                                                                    | The following questions ask about your ability to stand and move with and without support. "Support" means using items such as canes, walking sticks walkers and leg braces, or other people. Can you stand (with or without support)? |
| <b>d440</b>  | b730  |      |  |  |      | PFA22 | PROMIS Bank<br>v1.0 - Physical<br>Function | Are you able to open previously opened jars?                                               | Without any difficulty<br>With a little difficulty<br>With some difficulty<br>With much difficulty<br>Unable to do |                                                                                                                                                                                                                                        |
| <b>d440</b>  | d345  | d170 |  |  |      | PFA43 | PROMIS Bank<br>v1.0 - Physical<br>Function | Are you able to write with a pen or pencil?                                                | Without any difficulty<br>With a little difficulty<br>With some difficulty<br>With much difficulty<br>Unable to do |                                                                                                                                                                                                                                        |
| <b>d440</b>  | d445  |      |  |  |      | PFB23 | PROMIS Bank<br>v1.0 - Physical<br>Function | Are you able to pour liquid from a bottle into a glass?                                    | Without any difficulty<br>With a little difficulty<br>With some difficulty<br>With much difficulty<br>Unable to do |                                                                                                                                                                                                                                        |

|             |      |  |  |  |  |       |                                      |                                                                                |                                                                                                                    |  |
|-------------|------|--|--|--|--|-------|--------------------------------------|--------------------------------------------------------------------------------|--------------------------------------------------------------------------------------------------------------------|--|
| <b>d440</b> | d445 |  |  |  |  | PFB25 | PROMIS Bank v1.0 - Physical Function | Are you able to push open a door after turning the knob?                       | Without any difficulty<br>With a little difficulty<br>With some difficulty<br>With much difficulty<br>Unable to do |  |
| <b>d440</b> | d540 |  |  |  |  | PFA35 | PROMIS Bank v1.0 - Physical Function | Are you able to open and close a zipper?                                       | Without any difficulty<br>With a little difficulty<br>With some difficulty<br>With much difficulty<br>Unable to do |  |
| <b>d440</b> | d630 |  |  |  |  | PFA48 | PROMIS Bank v1.0 - Physical Function | Are you able to peel fruit?                                                    | Without any difficulty<br>With a little difficulty<br>With some difficulty<br>With much difficulty<br>Unable to do |  |
| <b>d440</b> |      |  |  |  |  | PFA28 | PROMIS Bank v1.0 - Physical Function | Are you able to open a can with a hand can opener?                             | Without any difficulty<br>With a little difficulty<br>With some difficulty<br>With much difficulty<br>Unable to do |  |
| <b>d440</b> |      |  |  |  |  | PFA40 | PROMIS Bank v1.0 - Physical Function | Are you able to turn a key in a lock?                                          | Without any difficulty<br>With a little difficulty<br>With some difficulty<br>With much difficulty<br>Unable to do |  |
| <b>d440</b> |      |  |  |  |  | PFB16 | PROMIS Bank v1.0 - Physical Function | Are you able to press with your index finger (for example ringing a doorbell)? | Without any difficulty<br>With a little difficulty<br>With some difficulty<br>With much difficulty<br>Unable to do |  |
| <b>d440</b> |      |  |  |  |  | PFB20 | PROMIS Bank v1.0 - Physical Function | Are you able to cut a piece of paper with scissors?                            | Without any difficulty<br>With a little difficulty<br>With some difficulty<br>With much difficulty<br>Unable to do |  |
| <b>d440</b> |      |  |  |  |  | PFB21 | PROMIS Bank v1.0 - Physical Function | Are you able to pick up coins from a table top?                                | Without any difficulty<br>With a little difficulty<br>With some difficulty<br>With much difficulty<br>Unable to do |  |
| <b>d440</b> |      |  |  |  |  | PFB22 | PROMIS Bank v1.0 - Physical Function | Are you able to hold a plate full of food?                                     | Without any difficulty<br>With a little difficulty<br>With some difficulty<br>With much difficulty<br>Unable to do |  |

|      |       |  |  |  |      |       |                                      |                                                                                                          |                                                                                                                    |                                                                                                                                                                                                                                        |
|------|-------|--|--|--|------|-------|--------------------------------------|----------------------------------------------------------------------------------------------------------|--------------------------------------------------------------------------------------------------------------------|----------------------------------------------------------------------------------------------------------------------------------------------------------------------------------------------------------------------------------------|
| d440 |       |  |  |  |      | PFB27 | PROMIS Bank v1.0 - Physical Function | Are you able to tie a knot or a bow?                                                                     | Without any difficulty<br>With a little difficulty<br>With some difficulty<br>With much difficulty<br>Unable to do |                                                                                                                                                                                                                                        |
| d440 |       |  |  |  |      | PFB37 | PROMIS Bank v1.0 - Physical Function | Are you able to turn faucets on and off?                                                                 | Without any difficulty<br>With a little difficulty<br>With some difficulty<br>With much difficulty<br>Unable to do |                                                                                                                                                                                                                                        |
| d440 |       |  |  |  |      | PFC43 | PROMIS Bank v1.0 - Physical Function | Are you able to use your hands, such as for turning faucets, using kitchen gadgets, or sewing?           | Without any difficulty<br>With a little difficulty<br>With some difficulty<br>With much difficulty<br>Unable to do |                                                                                                                                                                                                                                        |
| d440 |       |  |  |  |      | PF_9  | PROMIS PhysFuncMobility-Aids         | Are you able to receive a call on a cell phone?                                                          |                                                                                                                    | The following questions ask about your ability to stand and move with and without support. "Support" means using items such as canes, walking sticks walkers and leg braces, or other people. Can you stand (with or without support)? |
| d440 |       |  |  |  | PERF | PF_18 | PROMIS PhysFuncMobility-Aids         | Are you able to open and squeeze a new tube of toothpaste?                                               |                                                                                                                    | The following questions ask about your ability to stand and move with and without support. "Support" means using items such as canes, walking sticks walkers and leg braces, or other people. Can you stand (with or without support)? |
| d440 | d9200 |  |  |  | PERF | PF_64 | PROMIS PhysFuncMobility-Aids         | How much difficulty do you currently have playing cards or Bingo or other light recreational activities? |                                                                                                                    | The following questions ask about your ability to stand and move with and without support. "Support" means using items such as canes, walking sticks walkers and leg braces, or other people. Can you stand (with or without support)? |

|              |      |  |  |  |      |       |                                     |                                                                                  |  |                                                                                                                                                                                                                                        |
|--------------|------|--|--|--|------|-------|-------------------------------------|----------------------------------------------------------------------------------|--|----------------------------------------------------------------------------------------------------------------------------------------------------------------------------------------------------------------------------------------|
| <b>d440</b>  | d445 |  |  |  | PERF | PF_65 | PROMIS<br>PhysFuncMobility-<br>Aids | How much difficulty do you currently have removing wrappings from small objects? |  | The following questions ask about your ability to stand and move with and without support. "Support" means using items such as canes, walking sticks walkers and leg braces, or other people. Can you stand (with or without support)? |
| <b>d4401</b> |      |  |  |  | PERF | PF_12 | PROMIS<br>PhysFuncMobility-<br>Aids | How much difficulty do you currently have opening previously opened jars?        |  | The following questions ask about your ability to stand and move with and without support. "Support" means using items such as canes, walking sticks walkers and leg braces, or other people. Can you stand (with or without support)? |
| <b>d4401</b> |      |  |  |  | PERF | PF_36 | PROMIS<br>PhysFuncMobility-<br>Aids | Are you able to take a letter out of an envelope?                                |  | The following questions ask about your ability to stand and move with and without support. "Support" means using items such as canes, walking sticks walkers and leg braces, or other people. Can you stand (with or without support)? |
| <b>d4401</b> | d445 |  |  |  | PERF | PFB22 | PROMIS<br>PhysFuncMobility-<br>Aids | Are you able to hold a plate full of food?                                       |  | The following questions ask about your ability to stand and move with and without support. "Support" means using items such as canes, walking sticks walkers and leg braces, or other people. Can you stand (with or without support)? |

|              |  |  |  |  |      |       |                                     |                                                                  |  |                                                                                                                                                                                                                                        |
|--------------|--|--|--|--|------|-------|-------------------------------------|------------------------------------------------------------------|--|----------------------------------------------------------------------------------------------------------------------------------------------------------------------------------------------------------------------------------------|
| <b>d4402</b> |  |  |  |  | PERF | PF_10 | PROMIS<br>PhysFuncMobility-<br>Aids | Are you able to dial a number on a phone with large buttons?     |  | The following questions ask about your ability to stand and move with and without support. "Support" means using items such as canes, walking sticks walkers and leg braces, or other people. Can you stand (with or without support)? |
| <b>d4402</b> |  |  |  |  | PERF | PF_13 | PROMIS<br>PhysFuncMobility-<br>Aids | Are you able to dial a number on the keypad of a cell phone?     |  | The following questions ask about your ability to stand and move with and without support. "Support" means using items such as canes, walking sticks walkers and leg braces, or other people. Can you stand (with or without support)? |
| <b>d4402</b> |  |  |  |  | PERF | PF_31 | PROMIS<br>PhysFuncMobility-<br>Aids | Are you able to turn pages in a book?                            |  | The following questions ask about your ability to stand and move with and without support. "Support" means using items such as canes, walking sticks walkers and leg braces, or other people. Can you stand (with or without support)? |
| <b>d4402</b> |  |  |  |  | PERF | PF_37 | PROMIS<br>PhysFuncMobility-<br>Aids | Are you able to push the buttons on a television remote control? |  | The following questions ask about your ability to stand and move with and without support. "Support" means using items such as canes, walking sticks walkers and leg braces, or other people. Can you stand (with or without support)? |



|       |      |  |  |  |      |       |                                            |                                                                  |                                                                                                                    |                                                                                                                                                                                                                                        |
|-------|------|--|--|--|------|-------|--------------------------------------------|------------------------------------------------------------------|--------------------------------------------------------------------------------------------------------------------|----------------------------------------------------------------------------------------------------------------------------------------------------------------------------------------------------------------------------------------|
| d4402 |      |  |  |  | PERF | PF_38 | PROMIS<br>PhysFuncMobility-<br>Aids        | Are you able to get items in and out of a wallet?                |                                                                                                                    | The following questions ask about your ability to stand and move with and without support. "Support" means using items such as canes, walking sticks walkers and leg braces, or other people. Can you stand (with or without support)? |
| d4402 |      |  |  |  | PERF | PFB20 | PROMIS<br>PhysFuncMobility-<br>Aids        | Are you able to cut a piece of paper with scissors?              |                                                                                                                    | The following questions ask about your ability to stand and move with and without support. "Support" means using items such as canes, walking sticks walkers and leg braces, or other people. Can you stand (with or without support)? |
| d4402 |      |  |  |  | PERF | PFB21 | PROMIS<br>PhysFuncMobility-<br>Aids        | Are you able to pick up coins from a table top?                  |                                                                                                                    | The following questions ask about your ability to stand and move with and without support. "Support" means using items such as canes, walking sticks walkers and leg braces, or other people. Can you stand (with or without support)? |
| d4402 |      |  |  |  | PERF | PFB27 | PROMIS<br>PhysFuncMobility-<br>Aids        | Are you able to tie a knot or a bow?                             |                                                                                                                    | The following questions ask about your ability to stand and move with and without support. "Support" means using items such as canes, walking sticks walkers and leg braces, or other people. Can you stand (with or without support)? |
| d445  | b730 |  |  |  |      | PFA29 | PROMIS Bank<br>v1.0 - Physical<br>Function | Are you able to pull heavy objects (10 pounds) towards yourself? | Without any difficulty<br>With a little difficulty<br>With some difficulty<br>With much difficulty<br>Unable to do |                                                                                                                                                                                                                                        |

|      |      |      |  |  |  |       |                                      |                                                                                                      |                                                                                                                    |  |
|------|------|------|--|--|--|-------|--------------------------------------|------------------------------------------------------------------------------------------------------|--------------------------------------------------------------------------------------------------------------------|--|
| d445 | b730 |      |  |  |  | PFB28 | PROMIS Bank v1.0 - Physical Function | Are you able to lift 10 pounds above your shoulder?                                                  | Without any difficulty<br>With a little difficulty<br>With some difficulty<br>With much difficulty<br>Unable to do |  |
| d445 | b730 |      |  |  |  | PFB56 | PROMIS Bank v1.0 - Physical Function | Are you able to lift one pound (a full pint container) to shoulder level without bending your elbow? | Without any difficulty<br>With a little difficulty<br>With some difficulty<br>With much difficulty<br>Unable to do |  |
| d445 | d440 | d710 |  |  |  | PFB33 | PROMIS Bank v1.0 - Physical Function | Are you able to remove something from your back pocket?                                              | Without any difficulty<br>With a little difficulty<br>With some difficulty<br>With much difficulty<br>Unable to do |  |
| d445 | d650 | d440 |  |  |  | PFA18 | PROMIS Bank v1.0 - Physical Function | Are you able to use a hammer to pound a nail?                                                        | Without any difficulty<br>With a little difficulty<br>With some difficulty<br>With much difficulty<br>Unable to do |  |
| d445 |      |      |  |  |  | PFA12 | PROMIS Bank v1.0 - Physical Function | Are you able to push open a heavy door?                                                              | Without any difficulty<br>With a little difficulty<br>With some difficulty<br>With much difficulty<br>Unable to do |  |
| d445 |      |      |  |  |  | PFA17 | PROMIS Bank v1.0 - Physical Function | Are you able to reach into a high cupboard?                                                          | Without any difficulty<br>With a little difficulty<br>With some difficulty<br>With much difficulty<br>Unable to do |  |
| d445 |      |      |  |  |  | PFB31 | PROMIS Bank v1.0 - Physical Function | Are you able to open car doors?                                                                      | Without any difficulty<br>With a little difficulty<br>With some difficulty<br>With much difficulty<br>Unable to do |  |
| d445 |      |      |  |  |  | PFB34 | PROMIS Bank v1.0 - Physical Function | Are you able to change a light bulb overhead?                                                        | Without any difficulty<br>With a little difficulty<br>With some difficulty<br>With much difficulty<br>Unable to do |  |
| d445 |      |      |  |  |  | PFB39 | PROMIS Bank v1.0 - Physical Function | Are you able to reach and get down a 5 pound object from above your head?                            | Without any difficulty<br>With a little difficulty<br>With some difficulty<br>With much difficulty<br>Unable to do |  |

|             |      |  |  |  |      |       |                                            |                                                               |                                                                                                                    |                                                                                                                                                                                                                                                                   |
|-------------|------|--|--|--|------|-------|--------------------------------------------|---------------------------------------------------------------|--------------------------------------------------------------------------------------------------------------------|-------------------------------------------------------------------------------------------------------------------------------------------------------------------------------------------------------------------------------------------------------------------|
| <b>d445</b> |      |  |  |  |      | PFC31 | PROMIS Bank<br>v1.0 - Physical<br>Function | Are you able to reach into a low<br>cupboard?                 | Without any difficulty<br>With a little difficulty<br>With some difficulty<br>With much difficulty<br>Unable to do |                                                                                                                                                                                                                                                                   |
| <b>d445</b> | d470 |  |  |  |      | PF_2  | PROMIS<br>PhysFuncMobility-<br>Aids        | Are you able to fasten and unfasten a<br>seatbelt?            |                                                                                                                    | The following questions<br>ask about your ability to<br>stand and move with and<br>without support.<br>"Support" means using<br>items such as canes,<br>walking sticks walkers<br>and leg braces, or other<br>people. Can you stand<br>(with or without support)? |
| <b>d445</b> |      |  |  |  | PERF | PF_30 | PROMIS<br>PhysFuncMobility-<br>Aids        | Are you able to pour liquid from a<br>container into a cup?   |                                                                                                                    | The following questions<br>ask about your ability to<br>stand and move with and<br>without support.<br>"Support" means using<br>items such as canes,<br>walking sticks walkers<br>and leg braces, or other<br>people. Can you stand<br>(with or without support)? |
| <b>d445</b> | d440 |  |  |  | PERF | PF_40 | PROMIS<br>PhysFuncMobility-<br>Aids        | Are you able to turn sink faucets on<br>and off?              |                                                                                                                    | The following questions<br>ask about your ability to<br>stand and move with and<br>without support.<br>"Support" means using<br>items such as canes,<br>walking sticks walkers<br>and leg braces, or other<br>people. Can you stand<br>(with or without support)? |
| <b>d445</b> | d440 |  |  |  | PERF | PF_59 | PROMIS<br>PhysFuncMobility-<br>Aids        | Are you able to hold a card or letter in<br>order to read it? |                                                                                                                    | The following questions<br>ask about your ability to<br>stand and move with and<br>without support.<br>"Support" means using<br>items such as canes,<br>walking sticks walkers<br>and leg braces, or other<br>people. Can you stand<br>(with or without support)? |

|              |      |  |  |  |      |       |                                            |                                                                                  |                                                                   |                                                                                                                                                                                                                                        |
|--------------|------|--|--|--|------|-------|--------------------------------------------|----------------------------------------------------------------------------------|-------------------------------------------------------------------|----------------------------------------------------------------------------------------------------------------------------------------------------------------------------------------------------------------------------------------|
| <b>d445</b>  | b730 |  |  |  | PERF | PFC4  | PROMIS<br>PhysFuncMobility-<br>Aids        | Are you able to open a tight or new jar?                                         |                                                                   | The following questions ask about your ability to stand and move with and without support. "Support" means using items such as canes, walking sticks walkers and leg braces, or other people. Can you stand (with or without support)? |
| <b>d4451</b> |      |  |  |  | PERF | PFA12 | PROMIS<br>PhysFuncMobility-<br>Aids        | Are you able to push open a heavy door?                                          |                                                                   | The following questions ask about your ability to stand and move with and without support. "Support" means using items such as canes, walking sticks walkers and leg braces, or other people. Can you stand (with or without support)? |
| <b>d4453</b> |      |  |  |  | PERF | PF_39 | PROMIS<br>PhysFuncMobility-<br>Aids        | Are you able to turn a key to unlock a door?                                     |                                                                   | The following questions ask about your ability to stand and move with and without support. "Support" means using items such as canes, walking sticks walkers and leg braces, or other people. Can you stand (with or without support)? |
| <b>d450</b>  | b455 |  |  |  |      | PFB49 | PROMIS Bank<br>v1.0 - Physical<br>Function | Does your health now limit you in going for a short walk (less than 15 minutes)? | Not at all<br>Very little<br>Somewhat<br>Quite a lot<br>Cannot do |                                                                                                                                                                                                                                        |
| <b>d450</b>  | b455 |  |  |  |      | PFC20 | PROMIS Bank<br>v1.0 - Physical<br>Function | Does your health now limit you in walking one hundred yards?                     | Not at all<br>Very little<br>Somewhat<br>Quite a lot<br>Cannot do |                                                                                                                                                                                                                                        |
| <b>d450</b>  | b455 |  |  |  |      | PFC34 | PROMIS Bank<br>v1.0 - Physical<br>Function | Does your health now limit you in walking several hundred yards?                 | Not at all<br>Very little<br>Somewhat<br>Quite a lot<br>Cannot do |                                                                                                                                                                                                                                        |

|       |       |  |  |  |      |       |                                      |                                                                                                                     |                                                                                                                    |                                                                                                                                                                                                                                        |
|-------|-------|--|--|--|------|-------|--------------------------------------|---------------------------------------------------------------------------------------------------------------------|--------------------------------------------------------------------------------------------------------------------|----------------------------------------------------------------------------------------------------------------------------------------------------------------------------------------------------------------------------------------|
| d450  | b455  |  |  |  |      | PFC36 | PROMIS Bank v1.0 - Physical Function | Does your health now limit you in walking more than a mile?                                                         | Not at all<br>Very little<br>Somewhat<br>Quite a lot<br>Cannot do                                                  |                                                                                                                                                                                                                                        |
| d450  | d455  |  |  |  |      | PFA7  | PROMIS Bank v1.0 - Physical Function | How much do physical health problems now limit your usual physical activities (such as walking or climbing stairs)? | Not at all<br>Very little<br>Somewhat<br>Quite a lot<br>Cannot do                                                  |                                                                                                                                                                                                                                        |
| d450  | b455  |  |  |  |      | PFA23 | PROMIS Bank v1.0 - Physical Function | Are you able to go for a walk of at least 15 minutes?                                                               | Without any difficulty<br>With a little difficulty<br>With some difficulty<br>With much difficulty<br>Unable to do |                                                                                                                                                                                                                                        |
| d450  |       |  |  |  |      | PFC6  | PROMIS Bank v1.0 - Physical Function | Are you able to walk a block on flat ground?                                                                        | Without any difficulty<br>With a little difficulty<br>With some difficulty<br>With much difficulty<br>Unable to do |                                                                                                                                                                                                                                        |
| d450  |       |  |  |  |      | PFC38 | PROMIS Bank v1.0 - Physical Function | Are you able to walk at a normal speed?                                                                             | Without any difficulty<br>With a little difficulty<br>With some difficulty<br>With much difficulty<br>Unable to do |                                                                                                                                                                                                                                        |
| d450  |       |  |  |  | PERF | PFC38 | PROMIS PhysFuncMobility-Aids         | Are you able to walk at a normal speed?                                                                             |                                                                                                                    | The following questions ask about your ability to stand and move with and without support. "Support" means using items such as canes, walking sticks walkers and leg braces, or other people. Can you stand (with or without support)? |
| d4500 | d4602 |  |  |  |      | PFC6  | PROMIS PhysFuncMobility-Aids         | Are you able to walk a block on flat ground?                                                                        |                                                                                                                    | The following questions ask about your ability to stand and move with and without support. "Support" means using items such as canes, walking sticks walkers and leg braces, or other people. Can you stand (with or without support)? |

|              |      |      |  |  |      |             |                                            |                                                                                                                                         |                                                                   |                                                                                                                                                                                                                                        |
|--------------|------|------|--|--|------|-------------|--------------------------------------------|-----------------------------------------------------------------------------------------------------------------------------------------|-------------------------------------------------------------------|----------------------------------------------------------------------------------------------------------------------------------------------------------------------------------------------------------------------------------------|
| <b>d4500</b> |      |      |  |  |      | PF_Screener | PROMIS<br>PhysFuncMobility-<br>Aids        | Can you walk 25 feet on a level surface (with or without support)?                                                                      |                                                                   | The following questions ask about your ability to stand and move with and without support. "Support" means using items such as canes, walking sticks walkers and leg braces, or other people. Can you stand (with or without support)? |
| <b>d4501</b> | b455 |      |  |  |      | PF_17       | PROMIS<br>PhysFuncMobility-<br>Aids        | Are you able to walk more than a mile?                                                                                                  |                                                                   | The following questions ask about your ability to stand and move with and without support. "Support" means using items such as canes, walking sticks walkers and leg braces, or other people. Can you stand (with or without support)? |
| <b>d4501</b> |      |      |  |  |      | PFA23       | PROMIS<br>PhysFuncMobility-<br>Aids        | Are you able to go for a walk of at least 15 minutes?                                                                                   |                                                                   | The following questions ask about your ability to stand and move with and without support. "Support" means using items such as canes, walking sticks walkers and leg braces, or other people. Can you stand (with or without support)? |
| <b>d4502</b> |      |      |  |  | PERF | PF_45       | PROMIS<br>PhysFuncMobility-<br>Aids        | Are you able to move around on a slippery surface outdoors?                                                                             |                                                                   | The following questions ask about your ability to stand and move with and without support. "Support" means using items such as canes, walking sticks walkers and leg braces, or other people. Can you stand (with or without support)? |
| <b>d455</b>  | d430 | d920 |  |  |      | PFA1        | PROMIS Bank<br>v1.0 - Physical<br>Function | Does your health now limit you in doing vigorous activities, such as running, lifting heavy objects, participating in strenuous sports? | Not at all<br>Very little<br>Somewhat<br>Quite a lot<br>Cannot do |                                                                                                                                                                                                                                        |

|      |      |      |      |      |  |       |                                      |                                                                                                 |                                                                                                                    |  |
|------|------|------|------|------|--|-------|--------------------------------------|-------------------------------------------------------------------------------------------------|--------------------------------------------------------------------------------------------------------------------|--|
| d455 | d920 | d460 | b455 | d450 |  | PFB5  | PROMIS Bank v1.0 - Physical Function | Does your health now limit you in hiking a couple of miles on uneven surfaces, including hills? | Not at all<br>Very little<br>Somewhat<br>Quite a lot<br>Cannot do                                                  |  |
| d455 |      |      |      |      |  | PFC37 | PROMIS Bank v1.0 - Physical Function | Does your health now limit you in climbing one flight of stairs?                                | Not at all<br>Very little<br>Somewhat<br>Quite a lot<br>Cannot do                                                  |  |
| d455 | b455 | d920 |      |      |  | PFC7  | PROMIS Bank v1.0 - Physical Function | Are you able to run five miles?                                                                 | Without any difficulty<br>With a little difficulty<br>With some difficulty<br>With much difficulty<br>Unable to do |  |
| d455 | b455 |      |      |      |  | PFA19 | PROMIS Bank v1.0 - Physical Function | Are you able to run or jog for two miles?                                                       | Without any difficulty<br>With a little difficulty<br>With some difficulty<br>With much difficulty<br>Unable to do |  |
| d455 | b455 |      |      |      |  | PFA21 | PROMIS Bank v1.0 - Physical Function | Are you able to go up and down stairs at a normal pace?                                         | Without any difficulty<br>With a little difficulty<br>With some difficulty<br>With much difficulty<br>Unable to do |  |
| d455 | b455 |      |      |      |  | PFC13 | PROMIS Bank v1.0 - Physical Function | Are you able to run 100 yards?                                                                  | Without any difficulty<br>With a little difficulty<br>With some difficulty<br>With much difficulty<br>Unable to do |  |
| d455 | b455 |      |      |      |  | PFC33 | PROMIS Bank v1.0 - Physical Function | Are you able to run ten miles?                                                                  | Without any difficulty<br>With a little difficulty<br>With some difficulty<br>With much difficulty<br>Unable to do |  |
| d455 | d460 |      |      |      |  | PFB24 | PROMIS Bank v1.0 - Physical Function | Are you able to run a short distance, such as to catch a bus?                                   | Without any difficulty<br>With a little difficulty<br>With some difficulty<br>With much difficulty<br>Unable to do |  |
| d455 |      |      |      |      |  | PFA30 | PROMIS Bank v1.0 - Physical Function | Are you able to step up and down curbs?                                                         | Without any difficulty<br>With a little difficulty<br>With some difficulty<br>With much difficulty<br>Unable to do |  |

|      |      |  |  |  |      |       |                                      |                                                                             |                                                                                                                    |                                                                                                                                                                                                                                        |
|------|------|--|--|--|------|-------|--------------------------------------|-----------------------------------------------------------------------------|--------------------------------------------------------------------------------------------------------------------|----------------------------------------------------------------------------------------------------------------------------------------------------------------------------------------------------------------------------------------|
| d455 |      |  |  |  |      | PFA39 | PROMIS Bank v1.0 - Physical Function | Are you able to run at a fast pace for two miles?                           | Without any difficulty<br>With a little difficulty<br>With some difficulty<br>With much difficulty<br>Unable to do |                                                                                                                                                                                                                                        |
| d455 |      |  |  |  |      | PFB9  | PROMIS Bank v1.0 - Physical Function | Are you able to jump up and down?                                           | Without any difficulty<br>With a little difficulty<br>With some difficulty<br>With much difficulty<br>Unable to do |                                                                                                                                                                                                                                        |
| d455 |      |  |  |  |      | PFB10 | PROMIS Bank v1.0 - Physical Function | Are you able to climb up five steps?                                        | Without any difficulty<br>With a little difficulty<br>With some difficulty<br>With much difficulty<br>Unable to do |                                                                                                                                                                                                                                        |
| d455 |      |  |  |  |      | PFC29 | PROMIS Bank v1.0 - Physical Function | Are you able to walk up and down two steps?                                 | Without any difficulty<br>With a little difficulty<br>With some difficulty<br>With much difficulty<br>Unable to do |                                                                                                                                                                                                                                        |
| d455 |      |  |  |  |      | PFC32 | PROMIS Bank v1.0 - Physical Function | Are you able to climb up 5 flights of stairs?                               | Without any difficulty<br>With a little difficulty<br>With some difficulty<br>With much difficulty<br>Unable to do |                                                                                                                                                                                                                                        |
| d455 | b455 |  |  |  |      | PF_16 | PROMIS PhysFuncMobility-Aids         | Are you able to hike a couple of miles on uneven surfaces, including hills? |                                                                                                                    | The following questions ask about your ability to stand and move with and without support. "Support" means using items such as canes, walking sticks walkers and leg braces, or other people. Can you stand (with or without support)? |
| d455 | d440 |  |  |  | PERF | PF_15 | PROMIS PhysFuncMobility-Aids         | Are you able to pull up covers while lying in bed?                          |                                                                                                                    | The following questions ask about your ability to stand and move with and without support. "Support" means using items such as canes, walking sticks walkers and leg braces, or other people. Can you stand (with or without support)? |



|       |      |      |  |  |      |       |                                 |                                                                                                  |  |                                                                                                                                                                                                                                           |
|-------|------|------|--|--|------|-------|---------------------------------|--------------------------------------------------------------------------------------------------|--|-------------------------------------------------------------------------------------------------------------------------------------------------------------------------------------------------------------------------------------------|
| d455  | d450 |      |  |  | PERF | PF_55 | PROMIS<br>PhysFuncMobility-Aids | If you need to, are you physically able to rush for a short distance, such as to cross a street? |  | The following questions ask about your ability to stand and move with and without support.<br>"Support" means using items such as canes, walking sticks walkers and leg braces, or other people. Can you stand (with or without support)? |
| d4551 |      |      |  |  |      | PF_21 | PROMIS<br>PhysFuncMobility-Aids | Are you able to go up and down stairs?                                                           |  |                                                                                                                                                                                                                                           |
| d4551 |      |      |  |  |      | PFB10 | PROMIS<br>PhysFuncMobility-Aids | Are you able to climb up five steps?                                                             |  | The following questions ask about your ability to stand and move with and without support.<br>"Support" means using items such as canes, walking sticks walkers and leg braces, or other people. Can you stand (with or without support)? |
| d4551 | b730 | b455 |  |  | PERF | PFC32 | PROMIS<br>PhysFuncMobility-Aids | Are you able to climb up 5 flights of stairs?                                                    |  | The following questions ask about your ability to stand and move with and without support.<br>"Support" means using items such as canes, walking sticks walkers and leg braces, or other people. Can you stand (with or without support)? |
| d4551 |      |      |  |  | PERF | PFC29 | PROMIS<br>PhysFuncMobility-Aids | Are you able to walk up and down two steps?                                                      |  | The following questions ask about your ability to stand and move with and without support.<br>"Support" means using items such as canes, walking sticks walkers and leg braces, or other people. Can you stand (with or without support)? |

|       |      |  |  |  |      |       |                                            |                                                                                                                       |                                                                   |                                                                                                                                                                                                                                        |
|-------|------|--|--|--|------|-------|--------------------------------------------|-----------------------------------------------------------------------------------------------------------------------|-------------------------------------------------------------------|----------------------------------------------------------------------------------------------------------------------------------------------------------------------------------------------------------------------------------------|
| d4551 |      |  |  |  | PERF | PF_56 | PROMIS<br>PhysFuncMobility-<br>Aids        | Are you able to move from the street to the sidewalk without a curb cut?                                              |                                                                   | The following questions ask about your ability to stand and move with and without support. "Support" means using items such as canes, walking sticks walkers and leg braces, or other people. Can you stand (with or without support)? |
| d4551 | d470 |  |  |  | PERF | PF_62 | PROMIS<br>PhysFuncMobility-<br>Aids        | How much difficulty do you currently have getting into and out of a truck, bus, shuttle van or sport utility vehicle? |                                                                   | The following questions ask about your ability to stand and move with and without support. "Support" means using items such as canes, walking sticks walkers and leg braces, or other people. Can you stand (with or without support)? |
| d4552 |      |  |  |  |      | PFC13 | PROMIS<br>PhysFuncMobility-<br>Aids        | Are you able to run 100 yards?                                                                                        |                                                                   |                                                                                                                                                                                                                                        |
| d4552 |      |  |  |  | PERF | PF_33 | PROMIS<br>PhysFuncMobility-<br>Aids        | Are you able to reach above your head?                                                                                |                                                                   | The following questions ask about your ability to stand and move with and without support. "Support" means using items such as canes, walking sticks walkers and leg braces, or other people. Can you stand (with or without support)? |
| d4553 |      |  |  |  |      | PFB9  | PROMIS<br>PhysFuncMobility-<br>Aids        | Are you able to jump up and down?                                                                                     |                                                                   | The following questions ask about your ability to stand and move with and without support. "Support" means using items such as canes, walking sticks walkers and leg braces, or other people. Can you stand (with or without support)? |
| d460  |      |  |  |  |      | PFB54 | PROMIS Bank<br>v1.0 - Physical<br>Function | Does your health now limit you in going OUTSIDE the home, for example to shop or visit a doctor's office?             | Not at all<br>Very little<br>Somewhat<br>Quite a lot<br>Cannot do |                                                                                                                                                                                                                                        |

|              |      |      |  |  |      |       |                                      |                                                                                      |                                                                   |                                                                                                                                                                                                                                        |
|--------------|------|------|--|--|------|-------|--------------------------------------|--------------------------------------------------------------------------------------|-------------------------------------------------------------------|----------------------------------------------------------------------------------------------------------------------------------------------------------------------------------------------------------------------------------------|
| <b>d460</b>  |      |      |  |  |      | PFC56 | PROMIS Bank v1.0 - Physical Function | Does your health now limit you in walking about the house?                           | Not at all<br>Very little<br>Somewhat<br>Quite a lot<br>Cannot do |                                                                                                                                                                                                                                        |
| <b>d4600</b> |      |      |  |  | PERF | PF_42 | PROMIS PhysFuncMobility-Aids         | Are you able to move about the house?                                                |                                                                   | The following questions ask about your ability to stand and move with and without support. "Support" means using items such as canes, walking sticks walkers and leg braces, or other people. Can you stand (with or without support)? |
| <b>d4600</b> | b235 | b260 |  |  | PERF | PF_46 | PROMIS PhysFuncMobility-Aids         | Are you able to move about in a dark room or hallway without falling?                |                                                                   | The following questions ask about your ability to stand and move with and without support. "Support" means using items such as canes, walking sticks walkers and leg braces, or other people. Can you stand (with or without support)? |
| <b>d4601</b> |      |      |  |  | PERF | PF_57 | PROMIS PhysFuncMobility-Aids         | Are you able to use a moving escalator safely?                                       |                                                                   | The following questions ask about your ability to stand and move with and without support. "Support" means using items such as canes, walking sticks walkers and leg braces, or other people. Can you stand (with or without support)? |
| <b>d4602</b> |      |      |  |  |      | PF_1  | PROMIS PhysFuncMobility-Aids         | Are you able to go OUTSIDE the home, for example to shop or visit a doctor's office? |                                                                   |                                                                                                                                                                                                                                        |
| <b>d465</b>  |      |      |  |  |      | PF_3  | PROMIS PhysFuncMobility-Aids         | Are you able to stand on a moving escalator?                                         |                                                                   | The following questions ask about your ability to stand and move with and without support. "Support" means using items such as canes, walking sticks walkers and leg braces, or other people. Can you stand (with or without support)? |

|      |      |  |  |  |  |            |                                       |                                                                                                              |                                                                                                                    |                    |
|------|------|--|--|--|--|------------|---------------------------------------|--------------------------------------------------------------------------------------------------------------|--------------------------------------------------------------------------------------------------------------------|--------------------|
| d5   | d6   |  |  |  |  | SRPSAT47r1 | PROMIS Satis w SocialRolesActiviti es | I am satisfied with my ability to do regular personal and household responsibilities                         | 1=Not at all<br>2=A little bit<br>3=Somewhat<br>4=Quite a bit<br>5=Very much                                       |                    |
| d5   |      |  |  |  |  | SRPSAT47_0 | PROMIS Satis w SocialRolesActiviti es | I am satisfied with my ability to do regular personal responsibilities                                       | 1=Not at all<br>2=A little bit<br>3=Somewhat<br>4=Quite a bit<br>5=Very much                                       |                    |
| d5   | d6   |  |  |  |  | SRPSAT47   | PROMIS Bank v1.0 - Social Sat Role    | I am satisfied with my ability to do regular personal and household responsibilities                         | Not at all<br>A little bit<br>Somewhat<br>Quite a bit<br>Very much                                                 | In the past 7 days |
| d5   |      |  |  |  |  | PFB43      | PROMIS Bank v1.0 - Physical Function  | Does your health now limit you in taking care of your personal needs (dress, comb hair, toilet, eat, bathe)? | Not at all<br>Very little<br>Somewhat<br>Quite a lot<br>Cannot do                                                  |                    |
| d510 | d540 |  |  |  |  | PFA6       | PROMIS Bank v1.0 - Physical Function  | Does your health now limit you in bathing or dressing yourself?                                              | Not at all<br>Very little<br>Somewhat<br>Quite a lot<br>Cannot do                                                  |                    |
| d510 |      |  |  |  |  | PFB48      | PROMIS Bank v1.0 - Physical Function  | Does your health now limit you in taking a shower?                                                           | Not at all<br>Very little<br>Somewhat<br>Quite a lot<br>Cannot do                                                  |                    |
| d510 | b710 |  |  |  |  | PFA34      | PROMIS Bank v1.0 - Physical Function  | Are you able to wash your back?                                                                              | Without any difficulty<br>With a little difficulty<br>With some difficulty<br>With much difficulty<br>Unable to do |                    |
| d510 | d410 |  |  |  |  | PFB14      | PROMIS Bank v1.0 - Physical Function  | Are you able to take a tub bath?                                                                             | Without any difficulty<br>With a little difficulty<br>With some difficulty<br>With much difficulty<br>Unable to do |                    |
| d510 |      |  |  |  |  | PFA38      | PROMIS Bank v1.0 - Physical Function  | Are you able to dry your back with a towel?                                                                  | Without any difficulty<br>With a little difficulty<br>With some difficulty<br>With much difficulty<br>Unable to do |                    |

|             |       |  |  |  |      |       |                                      |                                         |                                                                                                                    |                                                                                                                                                                                                                                        |
|-------------|-------|--|--|--|------|-------|--------------------------------------|-----------------------------------------|--------------------------------------------------------------------------------------------------------------------|----------------------------------------------------------------------------------------------------------------------------------------------------------------------------------------------------------------------------------------|
| <b>d510</b> |       |  |  |  |      | PFA55 | PROMIS Bank v1.0 - Physical Function | Are you able to wash and dry your body? | Without any difficulty<br>With a little difficulty<br>With some difficulty<br>With much difficulty<br>Unable to do |                                                                                                                                                                                                                                        |
| <b>d510</b> | d4154 |  |  |  |      | PF_4  | PROMIS PhysFuncMobility-Aids         | Are you able to take a shower?          |                                                                                                                    | The following questions ask about your ability to stand and move with and without support. "Support" means using items such as canes, walking sticks walkers and leg braces, or other people. Can you stand (with or without support)? |
| <b>d510</b> |       |  |  |  |      | PF_5  | PROMIS PhysFuncMobility-Aids         | Are you able to wash and dry your feet? |                                                                                                                    | The following questions ask about your ability to stand and move with and without support. "Support" means using items such as canes, walking sticks walkers and leg braces, or other people. Can you stand (with or without support)? |
| <b>d510</b> |       |  |  |  | PERF | PFA55 | PROMIS PhysFuncMobility-Aids         | Are you able to wash and dry your body? |                                                                                                                    | The following questions ask about your ability to stand and move with and without support. "Support" means using items such as canes, walking sticks walkers and leg braces, or other people. Can you stand (with or without support)? |
| <b>d510</b> |       |  |  |  | PERF | PF_   | PROMIS PhysFuncMobility-Aids         | Are you able to wash and dry your feet? |                                                                                                                    | The following questions ask about your ability to stand and move with and without support. "Support" means using items such as canes, walking sticks walkers and leg braces, or other people. Can you stand (with or without support)? |

|              |      |      |  |  |      |       |                                            |                                                   |                                                                                                                    |                                                                                                                                                                                                                                        |
|--------------|------|------|--|--|------|-------|--------------------------------------------|---------------------------------------------------|--------------------------------------------------------------------------------------------------------------------|----------------------------------------------------------------------------------------------------------------------------------------------------------------------------------------------------------------------------------------|
| <b>d5102</b> |      |      |  |  | PERF | PFA38 | PROMIS<br>PhysFuncMobility-<br>Aids        | Are you able to dry your back with a towel?       |                                                                                                                    | The following questions ask about your ability to stand and move with and without support. "Support" means using items such as canes, walking sticks walkers and leg braces, or other people. Can you stand (with or without support)? |
| <b>d520</b>  | b730 |      |  |  |      | PFB19 | PROMIS Bank<br>v1.0 - Physical<br>Function | Are you able to squeeze a new tube of toothpaste? | Without any difficulty<br>With a little difficulty<br>With some difficulty<br>With much difficulty<br>Unable to do |                                                                                                                                                                                                                                        |
| <b>d520</b>  | d440 | d445 |  |  |      | PFA50 | PROMIS Bank<br>v1.0 - Physical<br>Function | Are you able to brush your teeth?                 | Without any difficulty<br>With a little difficulty<br>With some difficulty<br>With much difficulty<br>Unable to do |                                                                                                                                                                                                                                        |
| <b>d520</b>  | d440 |      |  |  |      | PFB18 | PROMIS Bank<br>v1.0 - Physical<br>Function | Are you able to shave your face or apply makeup?  | Without any difficulty<br>With a little difficulty<br>With some difficulty<br>With much difficulty<br>Unable to do |                                                                                                                                                                                                                                        |
| <b>d520</b>  |      |      |  |  |      | PFB26 | PROMIS Bank<br>v1.0 - Physical<br>Function | Are you able to shampoo your hair?                | Without any difficulty<br>With a little difficulty<br>With some difficulty<br>With much difficulty<br>Unable to do |                                                                                                                                                                                                                                        |
| <b>d520</b>  |      |      |  |  |      | PFB41 | PROMIS Bank<br>v1.0 - Physical<br>Function | Are you able to trim your fingernails?            | Without any difficulty<br>With a little difficulty<br>With some difficulty<br>With much difficulty<br>Unable to do |                                                                                                                                                                                                                                        |
| <b>d5201</b> |      |      |  |  | PERF | PFA50 | PROMIS<br>PhysFuncMobility-<br>Aids        | Are you able to brush your teeth?                 |                                                                                                                    | The following questions ask about your ability to stand and move with and without support. "Support" means using items such as canes, walking sticks walkers and leg braces, or other people. Can you stand (with or without support)? |

|              |  |  |  |  |      |       |                                            |                                                                                                       |                                                                                                                    |                                                                                                                                                                                                                                        |
|--------------|--|--|--|--|------|-------|--------------------------------------------|-------------------------------------------------------------------------------------------------------|--------------------------------------------------------------------------------------------------------------------|----------------------------------------------------------------------------------------------------------------------------------------------------------------------------------------------------------------------------------------|
| <b>d5202</b> |  |  |  |  | PERF | PFB26 | PROMIS<br>PhysFuncMobility-<br>Aids        | Are you able to shampoo your hair?                                                                    |                                                                                                                    | The following questions ask about your ability to stand and move with and without support. "Support" means using items such as canes, walking sticks walkers and leg braces, or other people. Can you stand (with or without support)? |
| <b>d5203</b> |  |  |  |  | PERF | PFB41 | PROMIS<br>PhysFuncMobility-<br>Aids        | Are you able to trim your fingernails?                                                                |                                                                                                                    | The following questions ask about your ability to stand and move with and without support. "Support" means using items such as canes, walking sticks walkers and leg braces, or other people. Can you stand (with or without support)? |
| <b>d5204</b> |  |  |  |  |      | PF_6  | PROMIS<br>PhysFuncMobility-<br>Aids        | Are you able to cut your toenails?                                                                    |                                                                                                                    | The following questions ask about your ability to stand and move with and without support. "Support" means using items such as canes, walking sticks walkers and leg braces, or other people. Can you stand (with or without support)? |
| <b>d530</b>  |  |  |  |  |      | PFC51 | PROMIS Bank<br>v1.0 - Physical<br>Function | Are you able to wipe yourself after using the toilet?                                                 | Without any difficulty<br>With a little difficulty<br>With some difficulty<br>With much difficulty<br>Unable to do |                                                                                                                                                                                                                                        |
| <b>d5301</b> |  |  |  |  | PERF | PF_19 | PROMIS<br>PhysFuncMobility-<br>Aids        | How much difficulty do you currently have pulling up and fastening your pants after a bowel movement? |                                                                                                                    | The following questions ask about your ability to stand and move with and without support. "Support" means using items such as canes, walking sticks walkers and leg braces, or other people. Can you stand (with or without support)? |

|              |      |  |  |  |      |       |                                            |                                                                                     |                                                                                                                    |                                                                                                                                                                                                                                        |
|--------------|------|--|--|--|------|-------|--------------------------------------------|-------------------------------------------------------------------------------------|--------------------------------------------------------------------------------------------------------------------|----------------------------------------------------------------------------------------------------------------------------------------------------------------------------------------------------------------------------------------|
| <b>d5301</b> |      |  |  |  | PERF | PF_27 | PROMIS<br>PhysFuncMobility-<br>Aids        | How much difficulty do you currently have cleaning yourself after a bowel movement? |                                                                                                                    | The following questions ask about your ability to stand and move with and without support. "Support" means using items such as canes, walking sticks walkers and leg braces, or other people. Can you stand (with or without support)? |
| <b>d540</b>  | d440 |  |  |  |      | PFA16 | PROMIS Bank<br>v1.0 - Physical<br>Function | Are you able to dress yourself, including tying shoelaces and doing buttons?        | Without any difficulty<br>With a little difficulty<br>With some difficulty<br>With much difficulty<br>Unable to do |                                                                                                                                                                                                                                        |
| <b>d540</b>  | d440 |  |  |  |      | PFA52 | PROMIS Bank<br>v1.0 - Physical<br>Function | Are you able to tie your shoelaces?                                                 | Without any difficulty<br>With a little difficulty<br>With some difficulty<br>With much difficulty<br>Unable to do |                                                                                                                                                                                                                                        |
| <b>d540</b>  | d440 |  |  |  |      | PFA54 | PROMIS Bank<br>v1.0 - Physical<br>Function | Are you able to button your shirt?                                                  | Without any difficulty<br>With a little difficulty<br>With some difficulty<br>With much difficulty<br>Unable to do |                                                                                                                                                                                                                                        |
| <b>d540</b>  | d440 |  |  |  |      | PFB17 | PROMIS Bank<br>v1.0 - Physical<br>Function | Are you able to put on and take off your socks?                                     | Without any difficulty<br>With a little difficulty<br>With some difficulty<br>With much difficulty<br>Unable to do |                                                                                                                                                                                                                                        |
| <b>d540</b>  | d445 |  |  |  |      | PFA47 | PROMIS Bank<br>v1.0 - Physical<br>Function | Are you able to pull on trousers?                                                   | Without any difficulty<br>With a little difficulty<br>With some difficulty<br>With much difficulty<br>Unable to do |                                                                                                                                                                                                                                        |
| <b>d540</b>  |      |  |  |  |      | PFA36 | PROMIS Bank<br>v1.0 - Physical<br>Function | Are you able to put on and take off a coat or jacket?                               | Without any difficulty<br>With a little difficulty<br>With some difficulty<br>With much difficulty<br>Unable to do |                                                                                                                                                                                                                                        |
| <b>d540</b>  |      |  |  |  |      | PFA44 | PROMIS Bank<br>v1.0 - Physical<br>Function | Are you able to put on a shirt or blouse?                                           | Without any difficulty<br>With a little difficulty<br>With some difficulty<br>With much difficulty<br>Unable to do |                                                                                                                                                                                                                                        |



|             |       |  |  |  |      |       |                                      |                                                       |                                                                                                                    |                                                                                                                                                                                                                                        |
|-------------|-------|--|--|--|------|-------|--------------------------------------|-------------------------------------------------------|--------------------------------------------------------------------------------------------------------------------|----------------------------------------------------------------------------------------------------------------------------------------------------------------------------------------------------------------------------------------|
| <b>d540</b> |       |  |  |  |      | PFB36 | PROMIS Bank v1.0 - Physical Function | Are you able to put on a pullover sweater?            | Without any difficulty<br>With a little difficulty<br>With some difficulty<br>With much difficulty<br>Unable to do |                                                                                                                                                                                                                                        |
| <b>d540</b> |       |  |  |  | PERF | PF_49 | PROMIS PhysFuncMobility-Aids         | Are you able to dress yourself?                       |                                                                                                                    | The following questions ask about your ability to stand and move with and without support. "Support" means using items such as canes, walking sticks walkers and leg braces, or other people. Can you stand (with or without support)? |
| <b>d540</b> | d4402 |  |  |  | PERF | PF_58 | PROMIS PhysFuncMobility-Aids         | Are you able to fasten buttons on a shirt or blouse?  |                                                                                                                    | The following questions ask about your ability to stand and move with and without support. "Support" means using items such as canes, walking sticks walkers and leg braces, or other people. Can you stand (with or without support)? |
| <b>d540</b> |       |  |  |  | PERF | PFA36 | PROMIS PhysFuncMobility-Aids         | Are you able to put on and take off a coat or jacket? |                                                                                                                    | The following questions ask about your ability to stand and move with and without support. "Support" means using items such as canes, walking sticks walkers and leg braces, or other people. Can you stand (with or without support)? |
| <b>d540</b> |       |  |  |  | PERF | PFA44 | PROMIS PhysFuncMobility-Aids         | Are you able to put on a shirt or blouse?             |                                                                                                                    | The following questions ask about your ability to stand and move with and without support. "Support" means using items such as canes, walking sticks walkers and leg braces, or other people. Can you stand (with or without support)? |

|              |       |  |  |  |      |       |                                            |                                                           |                                                                                                                    |                                                                                                                                                                                                                                        |
|--------------|-------|--|--|--|------|-------|--------------------------------------------|-----------------------------------------------------------|--------------------------------------------------------------------------------------------------------------------|----------------------------------------------------------------------------------------------------------------------------------------------------------------------------------------------------------------------------------------|
| <b>d5400</b> |       |  |  |  | PERF | PF_26 | PROMIS<br>PhysFuncMobility-<br>Aids        | Are you able to pull a sweater or t-shirt over your head? |                                                                                                                    | The following questions ask about your ability to stand and move with and without support. "Support" means using items such as canes, walking sticks walkers and leg braces, or other people. Can you stand (with or without support)? |
| <b>d5402</b> |       |  |  |  | PERF | PF_25 | PROMIS<br>PhysFuncMobility-<br>Aids        | Are you able to put on socks?                             |                                                                                                                    | The following questions ask about your ability to stand and move with and without support. "Support" means using items such as canes, walking sticks walkers and leg braces, or other people. Can you stand (with or without support)? |
| <b>d5403</b> | d4402 |  |  |  | PERF | PFA52 | PROMIS<br>PhysFuncMobility-<br>Aids        | Are you able to tie your shoelaces?                       |                                                                                                                    | The following questions ask about your ability to stand and move with and without support. "Support" means using items such as canes, walking sticks walkers and leg braces, or other people. Can you stand (with or without support)? |
| <b>d550</b>  | d440  |  |  |  |      | PFA20 | PROMIS Bank<br>v1.0 - Physical<br>Function | Are you able to cut your food using eating utensils?      | Without any difficulty<br>With a little difficulty<br>With some difficulty<br>With much difficulty<br>Unable to do |                                                                                                                                                                                                                                        |
| <b>d550</b>  |       |  |  |  | PERF | PFA20 | PROMIS<br>PhysFuncMobility-<br>Aids        | Are you able to cut your food using eating utensils?      |                                                                                                                    | The following questions ask about your ability to stand and move with and without support. "Support" means using items such as canes, walking sticks walkers and leg braces, or other people. Can you stand (with or without support)? |

|              |      |  |  |  |      |            |                                      |                                                                                                             |                                                                                                                    |                                                                                                                                                                                                                                        |
|--------------|------|--|--|--|------|------------|--------------------------------------|-------------------------------------------------------------------------------------------------------------|--------------------------------------------------------------------------------------------------------------------|----------------------------------------------------------------------------------------------------------------------------------------------------------------------------------------------------------------------------------------|
| <b>d560</b>  |      |  |  |  |      | PFB29      | PROMIS Bank v1.0 - Physical Function | Are you able to lift a full cup or glass to your mouth?                                                     | Without any difficulty<br>With a little difficulty<br>With some difficulty<br>With much difficulty<br>Unable to do |                                                                                                                                                                                                                                        |
| <b>d570</b>  |      |  |  |  |      | II31       | PROMIS Illness Impact (Neg)          | I take good care of myself How true was this before your illness? How true is this now, since your illness? | 1=Not at all<br>2=A little bit<br>3=Somewhat<br>4=Quite a bit<br>5=Very much                                       | <u>Thinking about how your illness has affected you</u>, please rate how true this statement was of you <u>before your illness</u>, and again now, <u>since your illness</u>.                                                          |
| <b>d570</b>  | d920 |  |  |  |      | PF_7       | PROMIS PhysFuncMobility-Aids         | Are you able to exercise regularly?                                                                         |                                                                                                                    | The following questions ask about your ability to stand and move with and without support. "Support" means using items such as canes, walking sticks walkers and leg braces, or other people. Can you stand (with or without support)? |
| <b>d5701</b> | b455 |  |  |  | PERF | PF_28      | PROMIS PhysFuncMobility-Aids         | Are you able to do an exercise of your choice for 20 minutes several times a week?                          |                                                                                                                    | The following questions ask about your ability to stand and move with and without support. "Support" means using items such as canes, walking sticks walkers and leg braces, or other people. Can you stand (with or without support)? |
| <b>d620</b>  | d660 |  |  |  |      | SRPSAT51_0 | PROMIS Satis w SocialRolesActivities | I am satisfied with my ability to run errands for others                                                    | 1=Not at all<br>2=A little bit<br>3=Somewhat<br>4=Quite a bit<br>5=Very much                                       |                                                                                                                                                                                                                                        |
| <b>d620</b>  |      |  |  |  |      | SRPSAT51r1 | PROMIS Satis w SocialRolesActivities | I am satisfied with my ability to run errands                                                               | 1=Not at all<br>2=A little bit<br>3=Somewhat<br>4=Quite a bit<br>5=Very much                                       |                                                                                                                                                                                                                                        |
| <b>d620</b>  |      |  |  |  |      | SRPSAT51   | PROMIS Bank v1.0 - Social Sat Role   | I am satisfied with my ability to run errands                                                               | Not at all<br>A little bit<br>Somewhat<br>Quite a bit<br>Very much                                                 | In the past 7 days                                                                                                                                                                                                                     |

|              |      |      |      |  |      |            |                                      |                                                                  |                                                                                                                    |                                                                                                                                                                                                                                        |
|--------------|------|------|------|--|------|------------|--------------------------------------|------------------------------------------------------------------|--------------------------------------------------------------------------------------------------------------------|----------------------------------------------------------------------------------------------------------------------------------------------------------------------------------------------------------------------------------------|
| <b>d620</b>  |      |      |      |  |      | PFA53      | PROMIS Bank v1.0 - Physical Function | Are you able to run errands and shop?                            | Without any difficulty<br>With a little difficulty<br>With some difficulty<br>With much difficulty<br>Unable to do |                                                                                                                                                                                                                                        |
| <b>d620</b>  |      |      |      |  | PERF | PFA53      | PROMIS PhysFuncMobility-Aids         | Are you able to run errands and shop?                            |                                                                                                                    | The following questions ask about your ability to stand and move with and without support. "Support" means using items such as canes, walking sticks walkers and leg braces, or other people. Can you stand (with or without support)? |
| <b>d630</b>  | d640 | d650 | d660 |  |      | SRPSAT39r1 | PROMIS Satis w SocialRolesActivities | I am satisfied with my ability to do household chores/tasks      | 1=Not at all<br>2=A little bit<br>3=Somewhat<br>4=Quite a bit<br>5=Very much                                       |                                                                                                                                                                                                                                        |
| <b>d630</b>  | d640 | d650 | d660 |  |      | SRPSAT39   | PROMIS Bank v1.0 - Social Sat Role   | I am satisfied with my ability to do household chores/tasks      | Not at all<br>A little bit<br>Somewhat<br>Quite a bit<br>Very much                                                 | In the past 7 days                                                                                                                                                                                                                     |
| <b>d630</b>  |      |      |      |  |      | PFB30      | PROMIS Bank v1.0 - Physical Function | Are you able to open a new milk carton?                          | Without any difficulty<br>With a little difficulty<br>With some difficulty<br>With much difficulty<br>Unable to do |                                                                                                                                                                                                                                        |
| <b>d6300</b> |      |      |      |  | PERF | PF_32      | PROMIS PhysFuncMobility-Aids         | Are you able to prepare simple meals for yourself or for others? |                                                                                                                    | The following questions ask about your ability to stand and move with and without support. "Support" means using items such as canes, walking sticks walkers and leg braces, or other people. Can you stand (with or without support)? |

|              |           |  |  |  |      |            |                                               |                                                                                            |                                                                       |                                                                                                                                                                                                                                        |
|--------------|-----------|--|--|--|------|------------|-----------------------------------------------|--------------------------------------------------------------------------------------------|-----------------------------------------------------------------------|----------------------------------------------------------------------------------------------------------------------------------------------------------------------------------------------------------------------------------------|
| <b>d6300</b> | d440      |  |  |  | PERF | PF_63      | PROMIS<br>PhysFuncMobility-<br>Aids           | How much difficulty do you currently have applying spreads to breads using a knife?        |                                                                       | The following questions ask about your ability to stand and move with and without support. "Support" means using items such as canes, walking sticks walkers and leg braces, or other people. Can you stand (with or without support)? |
| <b>d640</b>  | d840-859  |  |  |  |      | SRPPER06_0 | PROMIS Ability to participate in social roles | I have trouble accomplishing my usual work (include work at home)                          | 5 = Never<br>4 = Rarely<br>3 = Sometimes<br>2 = Usually<br>1 = Always |                                                                                                                                                                                                                                        |
| <b>d640</b>  | d840-859  |  |  |  |      | SRPPER16r1 | PROMIS Ability to participate in social roles | I have to do my work for shorter periods of time than usual (include work at home)         | 5 = Never<br>4 = Rarely<br>3 = Sometimes<br>2 = Usually<br>1 = Always |                                                                                                                                                                                                                                        |
| <b>d640</b>  | d840-d859 |  |  |  |      | SRPPER23_0 | PROMIS Ability to participate in social roles | I have trouble doing all of my usual work (include work at home)                           | 5 = Never<br>4 = Rarely<br>3 = Sometimes<br>2 = Usually<br>1 = Always |                                                                                                                                                                                                                                        |
| <b>d640</b>  | d840-d859 |  |  |  |      | SRPPER26_0 | PROMIS Ability to participate in social roles | I have trouble doing all of the work that is really important to me (include work at home) | 5 = Never<br>4 = Rarely<br>3 = Sometimes<br>2 = Usually<br>1 = Always |                                                                                                                                                                                                                                        |
| <b>d640</b>  | d840-d859 |  |  |  |      | SRPPER37_0 | PROMIS Ability to participate in social roles | I have trouble doing all of the work that I feel I should do (include work at home)        | 5 = Never<br>4 = Rarely<br>3 = Sometimes<br>2 = Usually<br>1 = Always |                                                                                                                                                                                                                                        |
| <b>d640</b>  | d840-d859 |  |  |  |      | SRPPER47_0 | PROMIS Ability to participate in social roles | I have trouble keeping up with my work responsibilities (include work at home)             | 5 = Never<br>4 = Rarely<br>3 = Sometimes<br>2 = Usually<br>1 = Always |                                                                                                                                                                                                                                        |
| <b>d640</b>  | d849-859  |  |  |  |      | SRPPER09_0 | PROMIS Ability to participate in social roles | I have trouble doing everything for work that I want to do (include work at home)          | 5 = Never<br>4 = Rarely<br>3 = Sometimes<br>2 = Usually<br>1 = Always |                                                                                                                                                                                                                                        |

|             |      |      |  |  |  |       |                                               |                                                                                                                                          |                                                                                                                    |  |
|-------------|------|------|--|--|--|-------|-----------------------------------------------|------------------------------------------------------------------------------------------------------------------------------------------|--------------------------------------------------------------------------------------------------------------------|--|
| <b>d640</b> |      |      |  |  |  | RP1   | PROMIS Ability to participate in social roles | I have trouble doing my regular daily work around the house                                                                              | 5 = Never<br>4 = Rarely<br>3 = Sometimes<br>2 = Usually<br>1 = Always                                              |  |
| <b>d640</b> | d650 | d430 |  |  |  | PFA4  | PROMIS Bank v1.0 - Physical Function          | Does your health now limit you in doing heavy work around the house like scrubbing floors, or lifting or moving heavy furniture?         | Not at all<br>Very little<br>Somewhat<br>Quite a lot<br>Cannot do                                                  |  |
| <b>d640</b> | d920 | b455 |  |  |  | PFB44 | PROMIS Bank v1.0 - Physical Function          | Does your health now limit you in doing moderate activities, such as moving a table, pushing a vacuum cleaner, bowling, or playing golf? | Not at all<br>Very little<br>Somewhat<br>Quite a lot<br>Cannot do                                                  |  |
| <b>d640</b> |      |      |  |  |  | PFB1  | PROMIS Bank v1.0 - Physical Function          | Does your health now limit you in doing moderate work around the house like vacuuming, sweeping floors or carrying in groceries?         | Not at all<br>Very little<br>Somewhat<br>Quite a lot<br>Cannot do                                                  |  |
| <b>d640</b> |      |      |  |  |  | PFB3  | PROMIS Bank v1.0 - Physical Function          | Does your health now limit you in putting a trash bag outside?                                                                           | Not at all<br>Very little<br>Somewhat<br>Quite a lot<br>Cannot do                                                  |  |
| <b>d640</b> | d415 |      |  |  |  | PFB11 | PROMIS Bank v1.0 - Physical Function          | Are you able to wash dishes, pots, and utensils by hand while standing at a sink?                                                        | Without any difficulty<br>With a little difficulty<br>With some difficulty<br>With much difficulty<br>Unable to do |  |
| <b>d640</b> | d445 |      |  |  |  | PFB12 | PROMIS Bank v1.0 - Physical Function          | Are you able to make a bed, including spreading and tucking in bed sheets?                                                               | Without any difficulty<br>With a little difficulty<br>With some difficulty<br>With much difficulty<br>Unable to do |  |
| <b>d640</b> |      |      |  |  |  | PFA11 | PROMIS Bank v1.0 - Physical Function          | Are you able to do chores such as vacuuming or yard work?                                                                                | Without any difficulty<br>With a little difficulty<br>With some difficulty<br>With much difficulty<br>Unable to do |  |

|              |       |  |  |  |      |       |                                     |                                                                                                     |  |                                                                                                                                                                                                                                        |
|--------------|-------|--|--|--|------|-------|-------------------------------------|-----------------------------------------------------------------------------------------------------|--|----------------------------------------------------------------------------------------------------------------------------------------------------------------------------------------------------------------------------------------|
| <b>d640</b>  | d650  |  |  |  | PERF | PF_29 | PROMIS<br>PhysFuncMobility-<br>Aids | Are you able to do strenuous tasks around the house like cleaning the bathroom or scrubbing floors? |  | The following questions ask about your ability to stand and move with and without support. "Support" means using items such as canes, walking sticks walkers and leg braces, or other people. Can you stand (with or without support)? |
| <b>d640</b>  |       |  |  |  | PERF | PF_60 | PROMIS<br>PhysFuncMobility-<br>Aids | Are you able to fold clean laundry?                                                                 |  | The following questions ask about your ability to stand and move with and without support. "Support" means using items such as canes, walking sticks walkers and leg braces, or other people. Can you stand (with or without support)? |
| <b>d640</b>  | d6402 |  |  |  | PERF | PFB12 | PROMIS<br>PhysFuncMobility-<br>Aids | Are you able to make a bed, including spreading and tucking in bed sheets?                          |  | The following questions ask about your ability to stand and move with and without support. "Support" means using items such as canes, walking sticks walkers and leg braces, or other people. Can you stand (with or without support)? |
| <b>d6400</b> |       |  |  |  | PERF | PF_44 | PROMIS<br>PhysFuncMobility-<br>Aids | Are you able to move wet clothes from the washer to the dryer?                                      |  | The following questions ask about your ability to stand and move with and without support. "Support" means using items such as canes, walking sticks walkers and leg braces, or other people. Can you stand (with or without support)? |

|              |      |  |  |  |      |       |                                            |                                                                       |                                                                                                                    |                                                                                                                                                                                                                                        |
|--------------|------|--|--|--|------|-------|--------------------------------------------|-----------------------------------------------------------------------|--------------------------------------------------------------------------------------------------------------------|----------------------------------------------------------------------------------------------------------------------------------------------------------------------------------------------------------------------------------------|
| <b>d6401</b> |      |  |  |  | PERF | PF_11 | PROMIS<br>PhysFuncMobility-<br>Aids        | Are you able to clean up after a meal?                                |                                                                                                                    | The following questions ask about your ability to stand and move with and without support. "Support" means using items such as canes, walking sticks walkers and leg braces, or other people. Can you stand (with or without support)? |
| <b>d6401</b> |      |  |  |  | PERF | PF_50 | PROMIS<br>PhysFuncMobility-<br>Aids        | Are you able to wash dishes and utensils by hand?                     |                                                                                                                    | The following questions ask about your ability to stand and move with and without support. "Support" means using items such as canes, walking sticks walkers and leg braces, or other people. Can you stand (with or without support)? |
| <b>d6402</b> |      |  |  |  | PERF | PF_20 | PROMIS<br>PhysFuncMobility-<br>Aids        | Are you able to do chores such as vacuuming carpet or mopping floors? |                                                                                                                    | The following questions ask about your ability to stand and move with and without support. "Support" means using items such as canes, walking sticks walkers and leg braces, or other people. Can you stand (with or without support)? |
| <b>d6402</b> |      |  |  |  | PERF | PF_34 | PROMIS<br>PhysFuncMobility-<br>Aids        | Are you able to do housework like vacuuming or sweeping floors?       |                                                                                                                    | The following questions ask about your ability to stand and move with and without support. "Support" means using items such as canes, walking sticks walkers and leg braces, or other people. Can you stand (with or without support)? |
| <b>d650</b>  | d440 |  |  |  |      | PFB15 | PROMIS Bank<br>v1.0 - Physical<br>Function | Are you able to change the bulb in a table lamp?                      | Without any difficulty<br>With a little difficulty<br>With some difficulty<br>With much difficulty<br>Unable to do |                                                                                                                                                                                                                                        |



|              |       |  |  |  |      |       |                                      |                                                                                    |                                                                                                                    |                                                                                                                                                                                                                                        |
|--------------|-------|--|--|--|------|-------|--------------------------------------|------------------------------------------------------------------------------------|--------------------------------------------------------------------------------------------------------------------|----------------------------------------------------------------------------------------------------------------------------------------------------------------------------------------------------------------------------------------|
| <b>d650</b>  |       |  |  |  |      | PFA25 | PROMIS Bank v1.0 - Physical Function | Are you able to do yard work like raking leaves, weeding, or pushing a lawn mower? | Without any difficulty<br>With a little difficulty<br>With some difficulty<br>With much difficulty<br>Unable to do |                                                                                                                                                                                                                                        |
| <b>d650</b>  |       |  |  |  |      | PFC49 | PROMIS Bank v1.0 - Physical Function | Are you able to water a house plant?                                               | Without any difficulty<br>With a little difficulty<br>With some difficulty<br>With much difficulty<br>Unable to do |                                                                                                                                                                                                                                        |
| <b>d650</b>  | d6501 |  |  |  | PERF | PFB15 | PROMIS PhysFuncMobility-Aids         | Are you able to change the bulb in a table lamp?                                   |                                                                                                                    | The following questions ask about your ability to stand and move with and without support. "Support" means using items such as canes, walking sticks walkers and leg braces, or other people. Can you stand (with or without support)? |
| <b>d6501</b> |       |  |  |  | PERF | PFB34 | PROMIS PhysFuncMobility-Aids         | Are you able to change a light bulb overhead?                                      |                                                                                                                    | The following questions ask about your ability to stand and move with and without support. "Support" means using items such as canes, walking sticks walkers and leg braces, or other people. Can you stand (with or without support)? |
| <b>d6505</b> |       |  |  |  | PERF | PF_35 | PROMIS PhysFuncMobility-Aids         | Are you able to do yard work like raking leaves or sweeping the driveway?          |                                                                                                                    | The following questions ask about your ability to stand and move with and without support. "Support" means using items such as canes, walking sticks walkers and leg braces, or other people. Can you stand (with or without support)? |

|              |      |  |  |  |      |            |                                             |                                                                                    |                                                                              |                                                                                                                                                                                                                                        |
|--------------|------|--|--|--|------|------------|---------------------------------------------|------------------------------------------------------------------------------------|------------------------------------------------------------------------------|----------------------------------------------------------------------------------------------------------------------------------------------------------------------------------------------------------------------------------------|
| <b>d6505</b> |      |  |  |  | PERF | PFA25      | PROMIS<br>PhysFuncMobility-<br>Aids         | Are you able to do yard work like raking leaves, weeding, or pushing a lawn mower? |                                                                              | The following questions ask about your ability to stand and move with and without support. "Support" means using items such as canes, walking sticks walkers and leg braces, or other people. Can you stand (with or without support)? |
| <b>d6505</b> |      |  |  |  | PERF | PFC49      | PROMIS<br>PhysFuncMobility-<br>Aids         | Are you able to water a house plant?                                               |                                                                              | The following questions ask about your ability to stand and move with and without support. "Support" means using items such as canes, walking sticks walkers and leg braces, or other people. Can you stand (with or without support)? |
| <b>d660</b>  | d750 |  |  |  |      | SRPSAT50r1 | PROMIS Satis w<br>SocialRolesActiviti<br>es | I am satisfied with my ability to meet the needs of those who depend on me         | 1=Not at all<br>2=A little bit<br>3=Somewhat<br>4=Quite a bit<br>5=Very much |                                                                                                                                                                                                                                        |
| <b>d660</b>  |      |  |  |  |      | SRPSAT06r1 | PROMIS Satis w<br>SocialRolesActiviti<br>es | I am satisfied with my ability to do things for my family                          | 1=Not at all<br>2=A little bit<br>3=Somewhat<br>4=Quite a bit<br>5=Very much |                                                                                                                                                                                                                                        |
| <b>d660</b>  |      |  |  |  |      | SRPSAT08r1 | PROMIS Satis w<br>SocialRolesActiviti<br>es | I feel good about my ability to do things for my family                            | 1=Not at all<br>2=A little bit<br>3=Somewhat<br>4=Quite a bit<br>5=Very much |                                                                                                                                                                                                                                        |
| <b>d660</b>  |      |  |  |  |      | SRPSAT22r1 | PROMIS Satis w<br>SocialRolesActiviti<br>es | I am happy with how much I do for my family                                        | 1=Not at all<br>2=A little bit<br>3=Somewhat<br>4=Quite a bit<br>5=Very much |                                                                                                                                                                                                                                        |
| <b>d660</b>  |      |  |  |  |      | SRPSAT38_0 | PROMIS Satis w<br>SocialRolesActiviti<br>es | I am satisfied with the amount of time I spend doing things for my family          | 1=Not at all<br>2=A little bit<br>3=Somewhat<br>4=Quite a bit<br>5=Very much |                                                                                                                                                                                                                                        |

|      |         |      |  |  |  |            |                                               |                                                                                   |                                                                              |  |
|------|---------|------|--|--|--|------------|-----------------------------------------------|-----------------------------------------------------------------------------------|------------------------------------------------------------------------------|--|
| d660 |         |      |  |  |  | SRPSAT45_0 | PROMIS Satis w SocialRolesActivities          | I am satisfied with my ability to meet the needs of my family                     | 1=Not at all<br>2=A little bit<br>3=Somewhat<br>4=Quite a bit<br>5=Very much |  |
| d660 | d710    |      |  |  |  | SRPPER17r1 | PROMIS Ability to participate in social roles | I feel limited in the amount of time I have for my family                         | 5 = Never<br>4 = Rarely<br>3 = Sometimes<br>2 = Usually<br>1 = Always        |  |
| d660 | d710    |      |  |  |  | SRPPER18_0 | PROMIS Ability to participate in social roles | I have trouble doing all of the family activities that I want to do               | 5 = Never<br>4 = Rarely<br>3 = Sometimes<br>2 = Usually<br>1 = Always        |  |
| d660 | d760    |      |  |  |  | SRPPER01r1 | PROMIS Ability to participate in social roles | I have trouble meeting the needs of my family                                     | 5 = Never<br>4 = Rarely<br>3 = Sometimes<br>2 = Usually<br>1 = Always        |  |
| d660 | d760    |      |  |  |  | SRPPER07_0 | PROMIS Ability to participate in social roles | I have trouble doing all of the family activities that I feel I should do         | 5 = Never<br>4 = Rarely<br>3 = Sometimes<br>2 = Usually<br>1 = Always        |  |
| d660 | d760    |      |  |  |  | SRPPER08_0 | PROMIS Ability to participate in social roles | I have trouble doing all of the family activities that are really important to me | 5 = Never<br>4 = Rarely<br>3 = Sometimes<br>2 = Usually<br>1 = Always        |  |
| d660 | d760    |      |  |  |  | SRPPER14r1 | PROMIS Ability to participate in social roles | I have to limit my regular family activities                                      | 5 = Never<br>4 = Rarely<br>3 = Sometimes<br>2 = Usually<br>1 = Always        |  |
| d660 | 840-d85 | d570 |  |  |  | SRPPER31_0 | PROMIS Ability to participate in social roles | I have trouble taking care of my regular personal responsibilities                | 5 = Never<br>4 = Rarely<br>3 = Sometimes<br>2 = Usually<br>1 = Always        |  |
| d660 |         |      |  |  |  | SRPPER05_0 | PROMIS Ability to participate in social roles | I have trouble doing everything for my family that I feel I should do             | 5 = Never<br>4 = Rarely<br>3 = Sometimes<br>2 = Usually<br>1 = Always        |  |

|      |      |  |  |  |  |            |                                               |                                                                                                                             |                                                                              |                                                                                                                                                                               |
|------|------|--|--|--|--|------------|-----------------------------------------------|-----------------------------------------------------------------------------------------------------------------------------|------------------------------------------------------------------------------|-------------------------------------------------------------------------------------------------------------------------------------------------------------------------------|
| d660 |      |  |  |  |  | SRPPER22_0 | PROMIS Ability to participate in social roles | I have trouble keeping up with my family responsibilities                                                                   | 5 = Never<br>4 = Rarely<br>3 = Sometimes<br>2 = Usually<br>1 = Always        |                                                                                                                                                                               |
| d660 |      |  |  |  |  | SRPSAT06   | PROMIS Bank v1.0 - Social Sat Role            | I am satisfied with my ability to do things for my family                                                                   | Not at all<br>A little bit<br>Somewhat<br>Quite a bit<br>Very much           | In the past 7 days                                                                                                                                                            |
| d660 |      |  |  |  |  | SRPSAT08   | PROMIS Bank v1.0 - Social Sat Role            | I feel good about my ability to do things for my family                                                                     | Not at all<br>A little bit<br>Somewhat<br>Quite a bit<br>Very much           | In the past 7 days                                                                                                                                                            |
| d660 |      |  |  |  |  | SRPSAT22   | PROMIS Bank v1.0 - Social Sat Role            | I am happy with how much I do for my family                                                                                 | Not at all<br>A little bit<br>Somewhat<br>Quite a bit<br>Very much           | In the past 7 days                                                                                                                                                            |
| d660 |      |  |  |  |  | SRPSAT50   | PROMIS Bank v1.0 - Social Sat Role            | I am satisfied with my ability to meet the needs of those who depend on me                                                  | Not at all<br>A little bit<br>Somewhat<br>Quite a bit<br>Very much           | In the past 7 days                                                                                                                                                            |
| d710 | d910 |  |  |  |  | II22       | PROMIS Illness Impact (Neg)                   | I feel connected to people in my community How true was this before your illness? How true is this now, since your illness? | 1=Not at all<br>2=A little bit<br>3=Somewhat<br>4=Quite a bit<br>5=Very much | <u>Thinking about how your illness has affected you</u>, please rate how true this statement was of you <u>before your illness</u>, and again now, <u>since your illness</u>. |
| d710 |      |  |  |  |  | II15       | PROMIS Illness Impact (Neg)                   | My relationships are meaningful How true was this before your illness? How true is this now, since your illness?            | 1=Not at all<br>2=A little bit<br>3=Somewhat<br>4=Quite a bit<br>5=Very much | <u>Thinking about how your illness has affected you</u>, please rate how true this statement was of you <u>before your illness</u>, and again now, <u>since your illness</u>. |
| d710 | d3   |  |  |  |  | SRPPER43r1 | PROMIS Ability to participate in social roles | I have trouble keeping in touch with others                                                                                 | 5 = Never<br>4 = Rarely<br>3 = Sometimes<br>2 = Usually<br>1 = Always        |                                                                                                                                                                               |

|      |  |  |  |  |  |            |                                               |                                                                                         |                                                                       |                    |
|------|--|--|--|--|--|------------|-----------------------------------------------|-----------------------------------------------------------------------------------------|-----------------------------------------------------------------------|--------------------|
| d710 |  |  |  |  |  | SRPPER13_0 | PROMIS Ability to participate in social roles | I have to limit social activities with groups of people                                 | 5 = Never<br>4 = Rarely<br>3 = Sometimes<br>2 = Usually<br>1 = Always |                    |
| d710 |  |  |  |  |  | SRPPER20_0 | PROMIS Ability to participate in social roles | I have trouble doing all of the activities with friends that are really important to me | 5 = Never<br>4 = Rarely<br>3 = Sometimes<br>2 = Usually<br>1 = Always |                    |
| d710 |  |  |  |  |  | SRPPER28r1 | PROMIS Ability to participate in social roles | I have to limit my regular activities with friends                                      | 5 = Never<br>4 = Rarely<br>3 = Sometimes<br>2 = Usually<br>1 = Always |                    |
| d710 |  |  |  |  |  | SRPPER35_0 | PROMIS Ability to participate in social roles | I have trouble doing everything for my friends that I want to do                        | 5 = Never<br>4 = Rarely<br>3 = Sometimes<br>2 = Usually<br>1 = Always |                    |
| d710 |  |  |  |  |  | SRPPER36_0 | PROMIS Ability to participate in social roles | I have trouble doing all of the activities with friends that I feel I should do         | 5 = Never<br>4 = Rarely<br>3 = Sometimes<br>2 = Usually<br>1 = Always |                    |
| d710 |  |  |  |  |  | SRPPER42r1 | PROMIS Ability to participate in social roles | I feel limited in my ability to visit friends                                           | 5 = Never<br>4 = Rarely<br>3 = Sometimes<br>2 = Usually<br>1 = Always |                    |
| d710 |  |  |  |  |  | SRPPER46_0 | PROMIS Ability to participate in social roles | I have trouble doing all of the activities with friends that I want to do               | 5 = Never<br>4 = Rarely<br>3 = Sometimes<br>2 = Usually<br>1 = Always |                    |
| d710 |  |  |  |  |  | SRPSAT25   | PROMIS Bank v1.0 - Social Sat DSA             | I am satisfied with my current level of activities with my friends                      | Not at all<br>A little bit<br>Somewhat<br>Quite a bit<br>Very much    | In the past 7 days |
| d720 |  |  |  |  |  | Iso-CaPS3  | PROMIS Isolation                              | I feel detached from other people                                                       | 1=Never<br>2=Rarely<br>3=Sometimes<br>4=Usually<br>5=Always           |                    |

|             |      |      |      |  |  |            |                             |                                                                                                                           |                                                                              |                                                                                                                                                                               |
|-------------|------|------|------|--|--|------------|-----------------------------|---------------------------------------------------------------------------------------------------------------------------|------------------------------------------------------------------------------|-------------------------------------------------------------------------------------------------------------------------------------------------------------------------------|
| <b>d720</b> |      |      |      |  |  | Iso-CaPS9  | PROMIS Isolation            | I feel like a stranger to those around me                                                                                 | 1=Never<br>2=Rarely<br>3=Sometimes<br>4=Usually<br>5=Always                  |                                                                                                                                                                               |
| <b>d750</b> | e3   | d760 | d770 |  |  | FSE31057x2 | PROMIS Companionship        | Do you have someone with whom to have fun?                                                                                | 1=Never<br>2=Rarely<br>3=Sometimes<br>4=Usually<br>5=Always                  |                                                                                                                                                                               |
| <b>d750</b> | e3   | d760 | d770 |  |  | FSE31061x2 | PROMIS Companionship        | Do you have someone with whom to relax?                                                                                   | 1=Never<br>2=Rarely<br>3=Sometimes<br>4=Usually<br>5=Always                  |                                                                                                                                                                               |
| <b>d750</b> | e3   | d760 | d770 |  |  | FSE31068x  | PROMIS Companionship        | Do you have someone with whom you can do something enjoyable?                                                             | 1=Never<br>2=Rarely<br>3=Sometimes<br>4=Usually<br>5=Always                  |                                                                                                                                                                               |
| <b>d750</b> | e3   | d760 | d770 |  |  | SSC-CaPS1  | PROMIS Companionship        | Do you have someone to keep you company at home?                                                                          | 1=Never<br>2=Rarely<br>3=Sometimes<br>4=Usually<br>5=Always                  |                                                                                                                                                                               |
| <b>d750</b> | e3   | d760 | d770 |  |  | SSC-CaPS10 | PROMIS Companionship        | Do you have someone to go with you to an event?                                                                           | 1=Never<br>2=Rarely<br>3=Sometimes<br>4=Usually<br>5=Always                  |                                                                                                                                                                               |
| <b>d750</b> | e3   | d760 | d770 |  |  | UCLA15x2   | PROMIS Companionship        | Can you find companionship when you want it?                                                                              | 1=Never<br>2=Rarely<br>3=Sometimes<br>4=Usually<br>5=Always                  |                                                                                                                                                                               |
| <b>d750</b> |      |      |      |  |  | GS1x       | PROMIS Emotional Support    | I feel close to my friends                                                                                                | 1=Never<br>2=Rarely<br>3=Sometimes<br>4=Usually<br>5=Always                  |                                                                                                                                                                               |
| <b>d750</b> | d760 | d770 |      |  |  | II21       | PROMIS Illness Impact (Neg) | I make time for family and friends<br>How true was this before your illness?<br>How true is this now, since your illness? | 1=Not at all<br>2=A little bit<br>3=Somewhat<br>4=Quite a bit<br>5=Very much | <u>Thinking about how your illness has affected you</u>, please rate how true this statement was of you <u>before your illness</u>, and again now, <u>since your illness</u>. |

|      |      |      |  |  |  |            |                                               |                                                                                                                            |                                                                              |                                                                                                                                                                               |
|------|------|------|--|--|--|------------|-----------------------------------------------|----------------------------------------------------------------------------------------------------------------------------|------------------------------------------------------------------------------|-------------------------------------------------------------------------------------------------------------------------------------------------------------------------------|
| d750 | d760 | d770 |  |  |  | II23       | PROMIS Illness Impact (Neg)                   | I feel close to people I care about<br>How true was this before your illness?<br>How true is this now, since your illness? | 1=Not at all<br>2=A little bit<br>3=Somewhat<br>4=Quite a bit<br>5=Very much | <u>Thinking about how your illness has affected you</u>, please rate how true this statement was of you <u>before your illness</u>, and again now, <u>since your illness</u>. |
| d750 | b126 |      |  |  |  | SRPSAT36r1 | PROMIS Satis w SocialRolesActivities          | I am happy with how much I do for my friends                                                                               | 1=Not at all<br>2=A little bit<br>3=Somewhat<br>4=Quite a bit<br>5=Very much |                                                                                                                                                                               |
| d750 |      |      |  |  |  | RP7_CaPS   | PROMIS Satis w SocialRolesActivities          | I am satisfied with my ability to maintain friendships                                                                     | 1=Not at all<br>2=A little bit<br>3=Somewhat<br>4=Quite a bit<br>5=Very much |                                                                                                                                                                               |
| d750 |      |      |  |  |  | SRPSAT34r1 | PROMIS Satis w SocialRolesActivities          | I feel good about my ability to do things for my friends                                                                   | 1=Not at all<br>2=A little bit<br>3=Somewhat<br>4=Quite a bit<br>5=Very much |                                                                                                                                                                               |
| d750 |      |      |  |  |  | SRPSAT37r1 | PROMIS Satis w SocialRolesActivities          | I am satisfied with the amount of time I spend visiting friends                                                            | 1=Not at all<br>2=A little bit<br>3=Somewhat<br>4=Quite a bit<br>5=Very much |                                                                                                                                                                               |
| d750 |      |      |  |  |  | SRPSAT46_C | PROMIS Satis w SocialRolesActivities          | I am satisfied with my ability to meet the needs of my friends                                                             | 1=Not at all<br>2=A little bit<br>3=Somewhat<br>4=Quite a bit<br>5=Very much |                                                                                                                                                                               |
| d750 | d760 | d770 |  |  |  | SRPPER_Ca  | PROMIS Ability to participate in social roles | I have to limit social activities at home                                                                                  | 5 = Never<br>4 = Rarely<br>3 = Sometimes<br>2 = Usually<br>1 = Always        |                                                                                                                                                                               |
| d750 |      |      |  |  |  | RP6        | PROMIS Ability to participate in social roles | I have trouble meeting the needs of my friends                                                                             | 5 = Never<br>4 = Rarely<br>3 = Sometimes<br>2 = Usually<br>1 = Always        |                                                                                                                                                                               |
| d750 |      |      |  |  |  | SRPPER54_C | PROMIS Ability to participate in social roles | I have trouble doing everything for my friends that I feel I should do                                                     | 5 = Never<br>4 = Rarely<br>3 = Sometimes<br>2 = Usually<br>1 = Always        |                                                                                                                                                                               |

|                 |      |  |  |  |  |            |                                       |                                                                                                     |                                                                              |                    |
|-----------------|------|--|--|--|--|------------|---------------------------------------|-----------------------------------------------------------------------------------------------------|------------------------------------------------------------------------------|--------------------|
| <b>d750</b>     |      |  |  |  |  | SRPSAT20   | PROMIS Bank v1.0 - Social Sat DSA     | I am satisfied with my ability to do things for my friends                                          | Not at all<br>A little bit<br>Somewhat<br>Quite a bit<br>Very much           | In the past 7 days |
| <b>d750</b>     |      |  |  |  |  | SRPSAT34   | PROMIS Bank v1.0 - Social Sat DSA     | I feel good about my ability to do things for my friends                                            | Not at all<br>A little bit<br>Somewhat<br>Quite a bit<br>Very much           | In the past 7 days |
| <b>d750</b>     |      |  |  |  |  | SRPSAT36   | PROMIS Bank v1.0 - Social Sat DSA     | I am happy with how much I do for my friends                                                        | Not at all<br>A little bit<br>Somewhat<br>Quite a bit<br>Very much           | In the past 7 days |
| <b>d750</b>     |      |  |  |  |  | SRPSAT37   | PROMIS Bank v1.0 - Social Sat DSA     | I am satisfied with the amount of time I spend visiting friends                                     | Not at all<br>A little bit<br>Somewhat<br>Quite a bit<br>Very much           | In the past 7 days |
| <b>d760</b>     | d920 |  |  |  |  | SRPSAT15_0 | PROMIS Satis w SocialRolesActiviti es | I am satisfied with my ability to participate in family activities                                  | 1=Not at all<br>2=A little bit<br>3=Somewhat<br>4=Quite a bit<br>5=Very much |                    |
| <b>d760</b>     |      |  |  |  |  | RP14_CaPS  | PROMIS Satis w SocialRolesActiviti es | I am satisfied with my current level of family activities                                           | 1=Not at all<br>2=A little bit<br>3=Somewhat<br>4=Quite a bit<br>5=Very much |                    |
| <b>d840-859</b> |      |  |  |  |  | SRPSAT07r1 | PROMIS Satis w SocialRolesActiviti es | I am satisfied with how much work I can do (include work at home)                                   | 1=Not at all<br>2=A little bit<br>3=Somewhat<br>4=Quite a bit<br>5=Very much |                    |
| <b>d840-859</b> |      |  |  |  |  | SRPSAT09r1 | PROMIS Satis w SocialRolesActiviti es | I am satisfied with my ability to do the work that is really important to me (include work at home) | 1=Not at all<br>2=A little bit<br>3=Somewhat<br>4=Quite a bit<br>5=Very much |                    |
| <b>d840-859</b> |      |  |  |  |  | SRPSAT21r1 | PROMIS Satis w SocialRolesActiviti es | I am satisfied with the amount of time I spend doing work (include work at home)                    | 1=Not at all<br>2=A little bit<br>3=Somewhat<br>4=Quite a bit<br>5=Very much |                    |



|          |      |  |  |  |  |            |                                               |                                                                                                      |                                                                              |                    |
|----------|------|--|--|--|--|------------|-----------------------------------------------|------------------------------------------------------------------------------------------------------|------------------------------------------------------------------------------|--------------------|
| d840-859 |      |  |  |  |  | SRPSAT24r1 | PROMIS Satis w SocialRolesActivities          | I am satisfied with my ability to work (include work at home)                                        | 1=Not at all<br>2=A little bit<br>3=Somewhat<br>4=Quite a bit<br>5=Very much |                    |
| d840-859 |      |  |  |  |  | SRPSAT35r1 | PROMIS Satis w SocialRolesActivities          | The quality of my work is as good as I want it to be (include work at home)                          | 1=Not at all<br>2=A little bit<br>3=Somewhat<br>4=Quite a bit<br>5=Very much |                    |
| d840-859 | d640 |  |  |  |  | SRPPER02r1 | PROMIS Ability to participate in social roles | I am limited in doing my work (include work at home)                                                 | 5 = Never<br>4 = Rarely<br>3 = Sometimes<br>2 = Usually<br>1 = Always        |                    |
| d840-859 |      |  |  |  |  | SRPSAT07   | PROMIS Bank v1.0 - Social Sat Role            | I am satisfied with how much work I can do (include work at home)                                    | Not at all<br>A little bit<br>Somewhat<br>Quite a bit<br>Very much           | In the past 7 days |
| d840-859 |      |  |  |  |  | SRPSAT09   | PROMIS Bank v1.0 - Social Sat Role            | I am satisfied with my ability to do the work that is really important to me (include work at home)  | Not at all<br>A little bit<br>Somewhat<br>Quite a bit<br>Very much           | In the past 7 days |
| d840-859 |      |  |  |  |  | SRPSAT21   | PROMIS Bank v1.0 - Social Sat Role            | I am satisfied with the amount of time I spend doing work (include work at home)                     | Not at all<br>A little bit<br>Somewhat<br>Quite a bit<br>Very much           | In the past 7 days |
| d840-859 |      |  |  |  |  | SRPSAT24   | PROMIS Bank v1.0 - Social Sat Role            | I am satisfied with my ability to work (include work at home)                                        | Not at all<br>A little bit<br>Somewhat<br>Quite a bit<br>Very much           | In the past 7 days |
| d840-859 |      |  |  |  |  | SRPSAT35   | PROMIS Bank v1.0 - Social Sat Role            | The quality of my work is as good as I want it to be (include work at home)                          | Not at all<br>A little bit<br>Somewhat<br>Quite a bit<br>Very much           | In the past 7 days |
| d910     | d9   |  |  |  |  | SRPSAT19r1 | PROMIS Satis w SocialRolesActivities          | I am satisfied with my ability to do all of the community activities that are really important to me | 1=Not at all<br>2=A little bit<br>3=Somewhat<br>4=Quite a bit<br>5=Very much |                    |

|             |       |  |  |  |  |            |                                       |                                                                                                      |                                                                              |                    |
|-------------|-------|--|--|--|--|------------|---------------------------------------|------------------------------------------------------------------------------------------------------|------------------------------------------------------------------------------|--------------------|
| <b>d910</b> |       |  |  |  |  | SRPSAT19   | PROMIS Bank v1.0 - Social Sat DSA     | I am satisfied with my ability to do all of the community activities that are really important to me | Not at all<br>A little bit<br>Somewhat<br>Quite a bit<br>Very much           | In the past 7 days |
| <b>d920</b> | d9205 |  |  |  |  | SRPSAT04_C | PROMIS Satis w SocialRolesActiviti es | I am satisfied with my ability to socialize with friends                                             | 1=Not at all<br>2=A little bit<br>3=Somewhat<br>4=Quite a bit<br>5=Very much |                    |
| <b>d920</b> |       |  |  |  |  | SRPSAT17_C | PROMIS Satis w SocialRolesActiviti es | I am satisfied with the extent of my social activities outside my home                               | 1=Not at all<br>2=A little bit<br>3=Somewhat<br>4=Quite a bit<br>5=Very much |                    |
| <b>d920</b> |       |  |  |  |  | SRPSAT03_C | PROMIS Satis w SocialRolesActiviti es | I am satisfied with how often I go out for entertainment                                             | 1=Not at all<br>2=A little bit<br>3=Somewhat<br>4=Quite a bit<br>5=Very much |                    |
| <b>d920</b> |       |  |  |  |  | SRPSAT05r1 | PROMIS Satis w SocialRolesActiviti es | I am satisfied with the amount of time I spend doing leisure activities                              | 1=Not at all<br>2=A little bit<br>3=Somewhat<br>4=Quite a bit<br>5=Very much |                    |
| <b>d920</b> |       |  |  |  |  | SRPSAT05_C | PROMIS Satis w SocialRolesActiviti es | I am satisfied with the amount of time I spend doing leisure activities with others                  | 1=Not at all<br>2=A little bit<br>3=Somewhat<br>4=Quite a bit<br>5=Very much |                    |
| <b>d920</b> |       |  |  |  |  | SRPSAT10r1 | PROMIS Satis w SocialRolesActiviti es | I am satisfied with my current level of social activity                                              | 1=Not at all<br>2=A little bit<br>3=Somewhat<br>4=Quite a bit<br>5=Very much |                    |
| <b>d920</b> |       |  |  |  |  | SRPSAT20r1 | PROMIS Satis w SocialRolesActiviti es | I am satisfied with my ability to do things for my friends                                           | 1=Not at all<br>2=A little bit<br>3=Somewhat<br>4=Quite a bit<br>5=Very much |                    |
| <b>d920</b> |       |  |  |  |  | SRPSAT23r1 | PROMIS Satis w SocialRolesActiviti es | I am satisfied with my ability to do leisure activities                                              | 1=Not at all<br>2=A little bit<br>3=Somewhat<br>4=Quite a bit<br>5=Very much |                    |

|      |  |  |  |  |  |            |                                             |                                                                                                            |                                                                              |  |
|------|--|--|--|--|--|------------|---------------------------------------------|------------------------------------------------------------------------------------------------------------|------------------------------------------------------------------------------|--|
| d920 |  |  |  |  |  | SRPSAT23_C | PROMIS Satis w<br>SocialRolesActiviti<br>es | I am satisfied with my ability to do<br>leisure activities with others                                     | 1=Not at all<br>2=A little bit<br>3=Somewhat<br>4=Quite a bit<br>5=Very much |  |
| d920 |  |  |  |  |  | SRPSAT25r1 | PROMIS Satis w<br>SocialRolesActiviti<br>es | I am satisfied with my current level of<br>activities with my friends                                      | 1=Not at all<br>2=A little bit<br>3=Somewhat<br>4=Quite a bit<br>5=Very much |  |
| d920 |  |  |  |  |  | SRPSAT29_C | PROMIS Satis w<br>SocialRolesActiviti<br>es | I am satisfied with my ability to<br>engage in activities with friends                                     | 1=Not at all<br>2=A little bit<br>3=Somewhat<br>4=Quite a bit<br>5=Very much |  |
| d920 |  |  |  |  |  | SRPSAT33r1 | PROMIS Satis w<br>SocialRolesActiviti<br>es | I am satisfied with my ability to do<br>things for fun outside my home                                     | 1=Not at all<br>2=A little bit<br>3=Somewhat<br>4=Quite a bit<br>5=Very much |  |
| d920 |  |  |  |  |  | SRPSAT33_C | PROMIS Satis w<br>SocialRolesActiviti<br>es | I am satisfied with my ability to do<br>things for fun with others                                         | 1=Not at all<br>2=A little bit<br>3=Somewhat<br>4=Quite a bit<br>5=Very much |  |
| d920 |  |  |  |  |  | SRPSAT41_C | PROMIS Satis w<br>SocialRolesActiviti<br>es | I am satisfied with the extent of my<br>social activities with groups of people                            | 1=Not at all<br>2=A little bit<br>3=Somewhat<br>4=Quite a bit<br>5=Very much |  |
| d920 |  |  |  |  |  | SRPSAT48r1 | PROMIS Satis w<br>SocialRolesActiviti<br>es | I am satisfied with my ability to do<br>things for fun at home (like reading,<br>listening to music, etc.) | 1=Not at all<br>2=A little bit<br>3=Somewhat<br>4=Quite a bit<br>5=Very much |  |
| d920 |  |  |  |  |  | SRPSAT52r1 | PROMIS Satis w<br>SocialRolesActiviti<br>es | I am satisfied with my ability to do all<br>of the leisure activities that are really<br>important to me   | 1=Not at all<br>2=A little bit<br>3=Somewhat<br>4=Quite a bit<br>5=Very much |  |
| d920 |  |  |  |  |  | SRPSAT52_C | PROMIS Satis w<br>SocialRolesActiviti<br>es | I am satisfied with my ability to do all<br>of the group activities that are really<br>important to me     | 1=Not at all<br>2=A little bit<br>3=Somewhat<br>4=Quite a bit<br>5=Very much |  |

|      |       |  |  |  |  |            |                                               |                                                                               |                                                                       |                    |
|------|-------|--|--|--|--|------------|-----------------------------------------------|-------------------------------------------------------------------------------|-----------------------------------------------------------------------|--------------------|
| d920 | d710  |  |  |  |  | SRPPER15_0 | PROMIS Ability to participate in social roles | I have to limit the things I do for fun with others                           | 5 = Never<br>4 = Rarely<br>3 = Sometimes<br>2 = Usually<br>1 = Always |                    |
| d920 |       |  |  |  |  | SRPPER03r1 | PROMIS Ability to participate in social roles | I have to limit social activities outside my home                             | 5 = Never<br>4 = Rarely<br>3 = Sometimes<br>2 = Usually<br>1 = Always |                    |
| d920 |       |  |  |  |  | SRPPER04_0 | PROMIS Ability to participate in social roles | I have trouble participating in recreational activities with others           | 5 = Never<br>4 = Rarely<br>3 = Sometimes<br>2 = Usually<br>1 = Always |                    |
| d920 |       |  |  |  |  | SRPPER11_0 | PROMIS Ability to participate in social roles | I have trouble doing all of my regular leisure activities with others         | 5 = Never<br>4 = Rarely<br>3 = Sometimes<br>2 = Usually<br>1 = Always |                    |
| d920 |       |  |  |  |  | SRPPER21_0 | PROMIS Ability to participate in social roles | I have trouble doing all the leisure activities with others that I want to do | 5 = Never<br>4 = Rarely<br>3 = Sometimes<br>2 = Usually<br>1 = Always |                    |
| d920 |       |  |  |  |  | SRPPER55r1 | PROMIS Ability to participate in social roles | I feel limited in the amount of time I have to visit friends                  | 5 = Never<br>4 = Rarely<br>3 = Sometimes<br>2 = Usually<br>1 = Always |                    |
| d920 | d9205 |  |  |  |  | SRPSAT10   | PROMIS Bank v1.0 - Social Sat DSA             | I am satisfied with my current level of social activity                       | Not at all<br>A little bit<br>Somewhat<br>Quite a bit<br>Very much    | In the past 7 days |
| d920 |       |  |  |  |  | SRPSAT05   | PROMIS Bank v1.0 - Social Sat DSA             | I am satisfied with the amount of time I spend doing leisure activities       | Not at all<br>A little bit<br>Somewhat<br>Quite a bit<br>Very much    | In the past 7 days |
| d920 |       |  |  |  |  | SRPSAT23   | PROMIS Bank v1.0 - Social Sat DSA             | I am satisfied with my ability to do leisure activities                       | Not at all<br>A little bit<br>Somewhat<br>Quite a bit<br>Very much    | In the past 7 days |

|              |      |      |  |  |      |           |                                      |                                                                                                                                 |                                                                    |                                                                                                                                                                                                                                        |
|--------------|------|------|--|--|------|-----------|--------------------------------------|---------------------------------------------------------------------------------------------------------------------------------|--------------------------------------------------------------------|----------------------------------------------------------------------------------------------------------------------------------------------------------------------------------------------------------------------------------------|
| <b>d920</b>  |      |      |  |  |      | SRPSAT33  | PROMIS Bank v1.0 - Social Sat DSA    | I am satisfied with my ability to do things for fun outside my home                                                             | Not at all<br>A little bit<br>Somewhat<br>Quite a bit<br>Very much | In the past 7 days                                                                                                                                                                                                                     |
| <b>d920</b>  |      |      |  |  |      | SRPSAT48  | PROMIS Bank v1.0 - Social Sat DSA    | I am satisfied with my ability to do things for fun at home (like reading, listening to music, etc.)                            | Not at all<br>A little bit<br>Somewhat<br>Quite a bit<br>Very much | In the past 7 days                                                                                                                                                                                                                     |
| <b>d920</b>  |      |      |  |  |      | SRPSAT52  | PROMIS Bank v1.0 - Social Sat DSA    | I am satisfied with my ability to do all of the leisure activities that are really important to me                              | Not at all<br>A little bit<br>Somewhat<br>Quite a bit<br>Very much | In the past 7 days                                                                                                                                                                                                                     |
| <b>d920</b>  | d455 | b455 |  |  |      | PFB7      | PROMIS Bank v1.0 - Physical Function | Does your health now limit you in doing strenuous activities such as backpacking, skiing, playing tennis, bicycling or jogging? | Not at all<br>Very little<br>Somewhat<br>Quite a lot<br>Cannot do  |                                                                                                                                                                                                                                        |
| <b>d920</b>  |      |      |  |  |      | PFB51     | PROMIS Bank v1.0 - Physical Function | Does your health now limit you in participating in active sports such as swimming, tennis, or basketball?                       | Not at all<br>Very little<br>Somewhat<br>Quite a lot<br>Cannot do  |                                                                                                                                                                                                                                        |
| <b>d9201</b> |      |      |  |  | PERF | PF_47     | PROMIS PhysFuncMobility-Aids         | Are you able to do vigorous activities, such as playing sports?                                                                 |                                                                    | The following questions ask about your ability to stand and move with and without support. "Support" means using items such as canes, walking sticks walkers and leg braces, or other people. Can you stand (with or without support)? |
| <b>e3</b>    | d760 |      |  |  |      | GS2x      | PROMIS Emotional Support             | I get emotional support from my family                                                                                          | 1=Never<br>2=Rarely<br>3=Sometimes<br>4=Usually<br>5=Always        |                                                                                                                                                                                                                                        |
| <b>e3</b>    |      |      |  |  |      | SSE-CaPS7 | PROMIS Emotional Support             | I have people who I can talk to about my health                                                                                 | 1=Never<br>2=Rarely<br>3=Sometimes<br>4=Usually<br>5=Always        |                                                                                                                                                                                                                                        |

|    |  |  |  |  |  |            |                             |                                                                     |                                                             |  |
|----|--|--|--|--|--|------------|-----------------------------|---------------------------------------------------------------------|-------------------------------------------------------------|--|
| e3 |  |  |  |  |  | FSE31053x2 | PROMIS<br>Emotional Support | I have someone who will listen to me when I need to talk            | 1=Never<br>2=Rarely<br>3=Sometimes<br>4=Usually<br>5=Always |  |
| e3 |  |  |  |  |  | FSE31059x2 | PROMIS<br>Emotional Support | I have someone to confide in or talk to about myself or my problems | 1=Never<br>2=Rarely<br>3=Sometimes<br>4=Usually<br>5=Always |  |
| e3 |  |  |  |  |  | FSE31066x2 | PROMIS<br>Emotional Support | I have someone with whom to share my most private worries and fears | 1=Never<br>2=Rarely<br>3=Sometimes<br>4=Usually<br>5=Always |  |
| e3 |  |  |  |  |  | FSE31069x2 | PROMIS<br>Emotional Support | I have someone who understands my problems                          | 1=Never<br>2=Rarely<br>3=Sometimes<br>4=Usually<br>5=Always |  |
| e3 |  |  |  |  |  | SS11x      | PROMIS<br>Emotional Support | I have someone who makes me feel needed                             | 1=Never<br>2=Rarely<br>3=Sometimes<br>4=Usually<br>5=Always |  |
| e3 |  |  |  |  |  | SS12x      | PROMIS<br>Emotional Support | I have someone who makes me feel appreciated                        | 1=Never<br>2=Rarely<br>3=Sometimes<br>4=Usually<br>5=Always |  |
| e3 |  |  |  |  |  | SSE-CaPS6  | PROMIS<br>Emotional Support | I have someone I trust to talk with about my feelings               | 1=Never<br>2=Rarely<br>3=Sometimes<br>4=Usually<br>5=Always |  |
| e3 |  |  |  |  |  | SSQ1x      | PROMIS<br>Emotional Support | I have people who care about what happens to me                     | 1=Never<br>2=Rarely<br>3=Sometimes<br>4=Usually<br>5=Always |  |
| e3 |  |  |  |  |  | SSQ2x      | PROMIS<br>Emotional Support | I get love and affection                                            | 1=Never<br>2=Rarely<br>3=Sometimes<br>4=Usually<br>5=Always |  |

|    |      |  |  |  |  |            |                               |                                                                            |                                                             |  |
|----|------|--|--|--|--|------------|-------------------------------|----------------------------------------------------------------------------|-------------------------------------------------------------|--|
| e3 |      |  |  |  |  | SSQ3x2     | PROMIS<br>Emotional Support   | I have someone to talk with when I have a bad day                          | 1=Never<br>2=Rarely<br>3=Sometimes<br>4=Usually<br>5=Always |  |
| e3 |      |  |  |  |  | SSQ4x2     | PROMIS<br>Emotional Support   | I have someone I trust to talk with about my problems                      | 1=Never<br>2=Rarely<br>3=Sometimes<br>4=Usually<br>5=Always |  |
| e3 |      |  |  |  |  | UCLA16x2   | PROMIS<br>Emotional Support   | I feel there are people who really understand me                           | 1=Never<br>2=Rarely<br>3=Sometimes<br>4=Usually<br>5=Always |  |
| e3 |      |  |  |  |  | UCLA19x3   | PROMIS<br>Emotional Support   | There are people I can talk to                                             | 1=Never<br>2=Rarely<br>3=Sometimes<br>4=Usually<br>5=Always |  |
| e3 | d750 |  |  |  |  | INF-CaPS4  | PROMIS<br>Information Support | My friends have useful information to help me with my problems             | 1=Never<br>2=Rarely<br>3=Sometimes<br>4=Usually<br>5=Always |  |
| e3 | d760 |  |  |  |  | INF-CaPS5  | PROMIS<br>Information Support | My family has useful information to help me with my problems               | 1=Never<br>2=Rarely<br>3=Sometimes<br>4=Usually<br>5=Always |  |
| e3 |      |  |  |  |  | FSE31054x2 | PROMIS<br>Information Support | I have someone to give me good advice about a crisis if I need it          | 1=Never<br>2=Rarely<br>3=Sometimes<br>4=Usually<br>5=Always |  |
| e3 |      |  |  |  |  | SS7x       | PROMIS<br>Information Support | I have someone to turn to for suggestions about how to deal with a problem | 1=Never<br>2=Rarely<br>3=Sometimes<br>4=Usually<br>5=Always |  |
| e3 |      |  |  |  |  | INF-CaPS2  | PROMIS<br>Information Support | I can get helpful advice from others when dealing with a problem           | 1=Never<br>2=Rarely<br>3=Sometimes<br>4=Usually<br>5=Always |  |

|    |      |      |  |  |  |            |                             |                                                                                                 |                                                             |  |
|----|------|------|--|--|--|------------|-----------------------------|-------------------------------------------------------------------------------------------------|-------------------------------------------------------------|--|
| e3 |      |      |  |  |  | INF-CaPS3  | PROMIS Information Support  | I have people I can turn to for help with my problems                                           | 1=Never<br>2=Rarely<br>3=Sometimes<br>4=Usually<br>5=Always |  |
| e3 |      |      |  |  |  | FSE31058x2 | PROMIS Information Support  | I have someone to give me information if I need it                                              | 1=Never<br>2=Rarely<br>3=Sometimes<br>4=Usually<br>5=Always |  |
| e3 |      |      |  |  |  | SSQ7x      | PROMIS Information Support  | I get useful advice about important things in life                                              | 1=Never<br>2=Rarely<br>3=Sometimes<br>4=Usually<br>5=Always |  |
| e3 |      |      |  |  |  | INF-CaPS1  | PROMIS Information Support  | Other people help me get information when I have a problem                                      | 1=Never<br>2=Rarely<br>3=Sometimes<br>4=Usually<br>5=Always |  |
| e3 |      |      |  |  |  | SSQ5x      | PROMIS Information Support  | I have someone to talk with about money matters                                                 | 1=Never<br>2=Rarely<br>3=Sometimes<br>4=Usually<br>5=Always |  |
| e3 | d750 | d760 |  |  |  | INS-CaPS6  | PROMIS Instrumental Support | Could you get a friend or family member to help move furniture around your home if you need it? | 1=Never<br>2=Rarely<br>3=Sometimes<br>4=Usually<br>5=Always |  |
| e3 | e340 |      |  |  |  | CCC31052x  | PROMIS Instrumental Support | Do you have someone to help you if you are confined to bed?                                     | 1=Never<br>2=Rarely<br>3=Sometimes<br>4=Usually<br>5=Always |  |
| e3 | e340 |      |  |  |  | CCC31062x  | PROMIS Instrumental Support | Do you have someone to prepare your meals if you are unable to do it yourself?                  | 1=Never<br>2=Rarely<br>3=Sometimes<br>4=Usually<br>5=Always |  |
| e3 | e340 |      |  |  |  | CCC31065x  | PROMIS Instrumental Support | Do you have someone to help with your daily chores if you are sick?                             | 1=Never<br>2=Rarely<br>3=Sometimes<br>4=Usually<br>5=Always |  |



|    |      |  |  |  |  |            |                             |                                                                                                                                |                                                                              |                                                                                                                                                                               |
|----|------|--|--|--|--|------------|-----------------------------|--------------------------------------------------------------------------------------------------------------------------------|------------------------------------------------------------------------------|-------------------------------------------------------------------------------------------------------------------------------------------------------------------------------|
| e3 | e340 |  |  |  |  | INS-CaPS2  | PROMIS Instrumental Support | Do you have someone to help you clean up around the home if you need it?                                                       | 1=Never<br>2=Rarely<br>3=Sometimes<br>4=Usually<br>5=Always                  |                                                                                                                                                                               |
| e3 |      |  |  |  |  | CCC31051x3 | PROMIS Instrumental Support | Is someone available to help you if you need it?                                                                               | 1=Never<br>2=Rarely<br>3=Sometimes<br>4=Usually<br>5=Always                  |                                                                                                                                                                               |
| e3 |      |  |  |  |  | CCC31055x  | PROMIS Instrumental Support | Do you have someone to take you to the doctor if you need it?                                                                  | 1=Never<br>2=Rarely<br>3=Sometimes<br>4=Usually<br>5=Always                  |                                                                                                                                                                               |
| e3 |      |  |  |  |  | INS-CaPS1  | PROMIS Instrumental Support | Do you have someone to bring you to an appointment if you need it?                                                             | 1=Never<br>2=Rarely<br>3=Sometimes<br>4=Usually<br>5=Always                  |                                                                                                                                                                               |
| e3 |      |  |  |  |  | SS6        | PROMIS Instrumental Support | Do you have someone to run errands if you need it?                                                                             | 1=Never<br>2=Rarely<br>3=Sometimes<br>4=Usually<br>5=Always                  |                                                                                                                                                                               |
| e3 |      |  |  |  |  | SS8        | PROMIS Instrumental Support | Do you have someone to pick up a prescription if you need it?                                                                  | 1=Never<br>2=Rarely<br>3=Sometimes<br>4=Usually<br>5=Always                  |                                                                                                                                                                               |
| e3 |      |  |  |  |  | SS9        | PROMIS Instrumental Support | Do you have someone to take over all of your responsibilities at home if you need it?                                          | 1=Never<br>2=Rarely<br>3=Sometimes<br>4=Usually<br>5=Always                  |                                                                                                                                                                               |
| e3 |      |  |  |  |  | CARES23x   | PROMIS Isolation            | I find that friends or relatives have difficulty talking with me about my health                                               | 1=Never<br>2=Rarely<br>3=Sometimes<br>4=Usually<br>5=Always                  |                                                                                                                                                                               |
| e3 |      |  |  |  |  | II12       | PROMIS Illness Impact (Neg) | I know who I can count on in times of trouble How true was this before your illness? How true is this now, since your illness? | 1=Not at all<br>2=A little bit<br>3=Somewhat<br>4=Quite a bit<br>5=Very much | <u>Thinking about how your illness has affected you</u>, please rate how true this statement was of you <u>before your illness</u>, and again now, <u>since your illness</u>. |

|    |      |  |  |  |  |           |                             |                                                                                                                                                 |                                                                              |                                                                                                                                                                               |
|----|------|--|--|--|--|-----------|-----------------------------|-------------------------------------------------------------------------------------------------------------------------------------------------|------------------------------------------------------------------------------|-------------------------------------------------------------------------------------------------------------------------------------------------------------------------------|
| e3 |      |  |  |  |  | II16      | PROMIS Illness Impact (Neg) | I am aware of the love and support available from other people How true was this before your illness? How true is this now, since your illness? | 1=Not at all<br>2=A little bit<br>3=Somewhat<br>4=Quite a bit<br>5=Very much | <u>Thinking about how your illness has affected you</u>, please rate how true this statement was of you <u>before your illness</u>, and again now, <u>since your illness</u>. |
| e3 |      |  |  |  |  | II17      | PROMIS Illness Impact (Neg) | I realize who my real friends are How true was this before your illness? How true is this now, since your illness?                              | 1=Not at all<br>2=A little bit<br>3=Somewhat<br>4=Quite a bit<br>5=Very much | <u>Thinking about how your illness has affected you</u>, please rate how true this statement was of you <u>before your illness</u>, and again now, <u>since your illness</u>. |
| e4 | b126 |  |  |  |  | Iso-CaPS2 | PROMIS Isolation            | I feel that people avoid talking to me                                                                                                          | 1=Never<br>2=Rarely<br>3=Sometimes<br>4=Usually<br>5=Always                  |                                                                                                                                                                               |
| e4 | b126 |  |  |  |  | SCSC3x2   | PROMIS Isolation            | I feel that some of my friends avoid me                                                                                                         | 1=Never<br>2=Rarely<br>3=Sometimes<br>4=Usually<br>5=Always                  |                                                                                                                                                                               |
| e4 | b126 |  |  |  |  | SS10x     | PROMIS Isolation            | I feel that some of my family members avoid me                                                                                                  | 1=Never<br>2=Rarely<br>3=Sometimes<br>4=Usually<br>5=Always                  |                                                                                                                                                                               |
| e4 | b126 |  |  |  |  | UCLA13x3  | PROMIS Isolation            | I feel that people barely know me                                                                                                               | 1=Never<br>2=Rarely<br>3=Sometimes<br>4=Usually<br>5=Always                  |                                                                                                                                                                               |
| e4 |      |  |  |  |  | SCSC2x3   | PROMIS Isolation            | People get the wrong idea about my situation                                                                                                    | 1=Never<br>2=Rarely<br>3=Sometimes<br>4=Usually<br>5=Always                  |                                                                                                                                                                               |
